# Supplementary material for: High-throughput oxygen chemical potential engineering of perovskite oxides for chemical looping applications
Source: Royal Society of Chemistry journal article supplement (doi:10.1039/d1ee02889h), 2022-01-01
Supplement: d1ee02889h1.pdf [file d1ee02889h1.pdf]

*Supplemental Information*

**High-Throughput Oxygen Chemical Potential Engineering of  
Perovskite Oxides for Chemical Looping Applications**

Xijun Wang,<sup>‡a</sup> Yunfei Gao,<sup>‡a</sup> Emily Krzystowczyk,<sup>‡a</sup> Sherafghan Iftikhar,<sup>a</sup> Jian Dou,<sup>a</sup> Runxia Cai,<sup>a</sup>

Haiying Wang,<sup>a,b</sup> Chongyan Ruan,<sup>a</sup> Sheng Ye,<sup>c</sup> Fanxing Li,<sup>\*a</sup>

<sup>a</sup>*Department of Chemical and Biomolecular Engineering, North Carolina State University, Raleigh, North Carolina 27606, United States*

<sup>b</sup>*College of Chemistry & Chemical Engineering, Northeast Petroleum University, Daqing, 163318, P. R. China*

<sup>c</sup>*Hefei National Laboratory for Physical Sciences at the Microscale, Collaborative Innovation Center of Chemistry for Energy Materials, CAS Center for Excellence in Nanoscience, School of Chemistry and Materials Science, University of Science and Technology of China, Hefei, Anhui 230026, P. R. China*

<sup>‡</sup>*These authors contributed equally to this work.*

*\*Email: [fli5@ncsu.edu](mailto:fli5@ncsu.edu)*

**Keywords:** High-throughput, Machine learning, SrFeO<sub>3</sub>, Perovskite, Chemical looping, Air separation, CO<sub>2</sub> splitting

## 1. Overbinding of O<sub>2</sub>

To address the overbinding issue of the O<sub>2</sub> molecule within DFT, we applied the CBS-QB3 method implemented by Gaussian16<sup>1</sup> to calculate the enthalpy and entropy of O<sub>2</sub>. DFT results agreed very well with the data obtained from NIST database<sup>2</sup> when T < 1,000 K, as shown in **Figure S1**. At 0 K, the CBS-QB3<sup>3</sup> computed O-O binding energy of O<sub>2</sub> is -5.15 eV, which also agrees well with the experimental value (-5.12 eV).<sup>4</sup> These demonstrate that CBS-QB3 method is suitable within the studied temperature range. However, the energy obtained from CBS-QB3 is not directly compatible with the energies obtained by VASP (PAW/PBE) calculations due to different basis set and pseudo potential. To solve this problem, and to avoid reintroducing the overbinding error, we defined a T-dependent binding energy of O<sub>2</sub> computed by CBS-QB3:

$$H_{binding}^{CBS-QB3}(T) = H_{O_2}^{CBS-QB3}(T) - 2H_0^{CBS-QB3}(T) \quad (1)$$

Then, we translate the  $H_0^{CBS-QB3}(T)$  to  $H_0^{PAW/PBE}(T)$  by

$$H_0^{PAW/PBE}(T) = H_0^{CBS-QB3}(T) - H_0^{CBS-QB3}(0K) + H_0^{PAW/PBE}(0K) \quad (2)$$

So that the T-dependent  $H_{O_2}$  can be written as:

$$H_{O_2}(T) = 2H_0^{PAW/PBE}(T) + H_{binding}^{CBS-QB3}(T) \quad (3)$$

**Table S1** lists some computed enthalpy, entropy and Gibbs free energy values at the studied temperatures in this work.

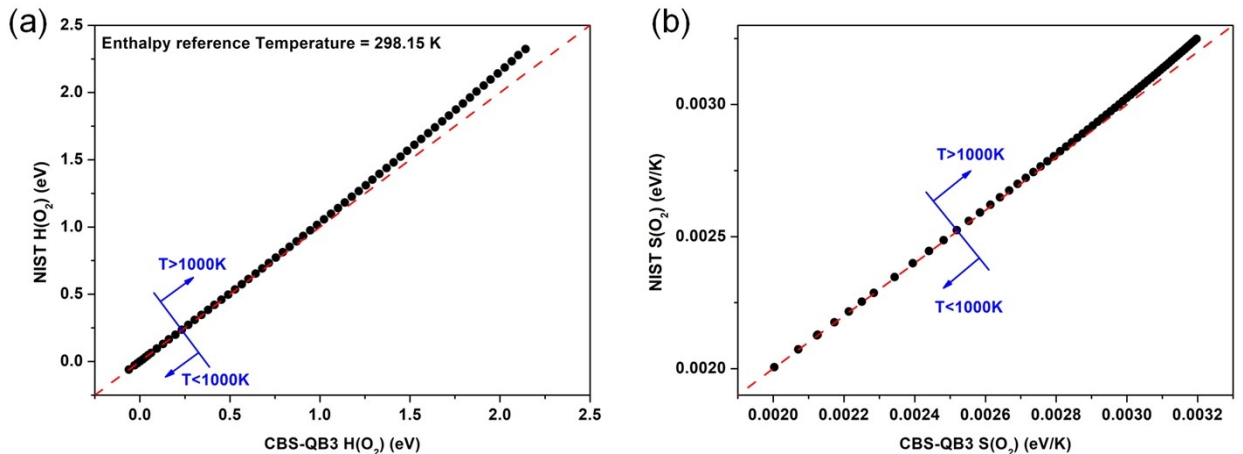

**Figure S1.** Comparison of the (a) enthalpy and (b) entropy of O<sub>2</sub> computed by CBS-QB3 method and from the NIST database.

**Table S1.** Computed enthalpy, entropy, and Gibbs free energy values at 0K, 400, 500, 600, and 700

°C.

| T (°C)  | $H_{binding}^{CBS-QB3}(T)$ (eV) | $H_o(T)$ (eV) | $H_{o_2}(T)$ (eV) | $TS_{o_2}(T)$ (eV) | $G_{o_2}(T)$ (eV) |
|---------|---------------------------------|---------------|-------------------|--------------------|-------------------|
| -273.15 | -5.1546                         | -1.90264      | -8.95985          | 0                  | -8.95985          |
| 400     | -5.2352                         | -1.7576       | -8.75038          | 1.60321            | -10.35359         |
| 500     | -5.2446                         | -1.73605      | -8.71667          | 1.87778            | -10.59445         |
| 600     | -5.2513                         | -1.71453      | -8.68037          | 2.15751            | -10.83788         |
| 700     | -5.2589                         | -1.69298      | -8.64485          | 2.4419             | -11.08675         |
| 800     | -5.2671                         | -1.67115      | -8.60937          | 2.73045            | -11.33982         |
| 900     | -5.2739                         | -1.6496       | -8.57313          | 3.02275            | -11.59588         |
| 950     | -5.2778                         | -1.63883      | -8.55544          | 3.17021            | -11.72565         |
| 1000    | -5.2810                         | -1.62808      | -8.53718          | 3.31851            | -11.85569         |

## 2. Exclusion of non-neutral $Sr_xA_{1-x}Fe_yB_{1-y}O_{3-\delta}$ candidates

In  $Sr_xA_{1-x}Fe_yB_{1-y}O_{3-\delta}$ , where A = Sr, Ca, K, Y, Ba, La; B = Fe, Co, Cu, Mg, Mn, Ni. Some elements usually have fixed oxidation states whereas the others have multiple oxidation states, as listed in **Table S2**. To make the system charge neutral, the total positive oxidation states should be equal to the total negative oxidation states:

$$2x + V_A(1-x) + V_{Fe} \cdot y + V_B(1-y) = 2 \cdot (3 - \delta), \delta \in [0, 0.5]$$

$$\Rightarrow \begin{cases} 2x + V_A(1-x) + 3y + V_{B_{min}}(1-y) \leq 6 \\ 2x + V_A(1-x) + 4y + V_{B_{max}}(1-y) \geq 5 \end{cases}$$

where  $V_A$  and  $V_B$  represent the oxidation states of A- and B-site dopant cations, respectively. Using this criterion, we excluded 168 candidates, such as  $KMgO_{3-\delta}$ ,  $Sr_{0.125}Ba_{0.875}Fe_{0.125}Mg_{0.875}O_{3-\delta}$ , etc. because they cannot be charge neutral.

**Table S2.** Ionic radii used in this work. All ionic radii are taken from the database of ionic radii<sup>5</sup> except for  $Mg^{2+}$ ,  $Cu^{3+}$  and  $Y^{3+}$ , which are extrapolated with  $r = a - b \cdot \log_{10}(z/CN)$ .

| Ion       | radius (Å) | Ion       | radius (Å) | Ion       | radius (Å) |
|-----------|------------|-----------|------------|-----------|------------|
| $Sr^{2+}$ | 1.44       | $Fe^{3+}$ | 0.645      | $Fe^{4+}$ | 0.585      |
| $Ca^{2+}$ | 1.34       | $Co^{3+}$ | 0.61       | $Co^{4+}$ | 0.53       |
| $K^+$     | 1.64       | $Cu^{3+}$ | 0.71       | $Cu^{4+}$ | 0.69       |
| $Y^{3+}$  | 1.196      | $Mn^{3+}$ | 0.645      | $Mn^{4+}$ | 0.53       |
| $Ba^{2+}$ | 1.61       | $Ni^{3+}$ | 0.60       | $Ni^{4+}$ | 0.48       |
| $La^{3+}$ | 1.36       | $Ti^{3+}$ | 0.67       | $Ti^{4+}$ | 0.605      |
| $Sm^{2+}$ | 1.24       | $Mg^{2+}$ | 0.72       | $O^{2-}$  | 1.40       |

\*Radius of oxygen vacancy = 1.31 Å.<sup>6</sup>

## 3. Adaption of the modified tolerance factor to the $Sr_xA_{1-x}Fe_yB_{1-y}O_{3-\delta}$ system

$$\tau = \frac{r_O}{r_B} - n_A \left( n_A - \frac{r_A/r_B}{\ln(r_A/r_B)} \right)$$

The Bartel *et al.* modified tolerance factor ( ) shows a great potential in predicting the stability of perovskite structures. To calculate the tolerance factor, radius and oxidation state of each ion should be specified. A simple way is to assume that the oxidization states of each ion are fixed and use the corresponding radii data of the ions at the specified oxidization states. However, the problem is that the radii and oxidation states of Fe and B are unidentified in the  $\text{Sr}_x\text{A}_{1-x}\text{Fe}_y\text{B}_{1-y}\text{O}_{3-\delta}$  system, as exemplified by  $\text{Sr}_{0.5}^{2+}\text{Y}_{0.5}^{3+}\text{Fe}_{0.5}^{a+}\text{Co}_{0.5}^{b+}\text{O}_3^{2-}$ , where we can easily get  $a + b = 7$ , but the exact values of  $a$  and  $b$  are unknown, which can affect the calculations of the average radius of B site. It can also be possible that a percentage of Co are +3, and the rest of Co are +4 because each Co cation has different local coordination environments. To address this issue, we tried to modify the estimation of average  $n_B$  and  $r_B$  based on the percentage distribution of the B site oxidation states.

Firstly, we marked the average oxidation state of each element as  $\text{Sr}_x^{2+}\text{A}_{1-x}^{n_A+}\text{Fe}_y^{n_{\text{Fe}}+}\text{B}_{1-y}^{n_B+}\text{O}_{3-\delta}^{2-}$ , here  $n_A$ ,  $n_{\text{Fe}}$  and  $n_B$  are the average oxidation states of A, Fe and B. Normally  $n_A$  is a constant because the atomic orbitals of A-site cations are usually not in the frontier orbitals, while the average  $n_{\text{Fe}}$  and  $n_B$  should be in the ranges of [+3, +4] and [ $n_{B\_min}$ ,  $n_{B\_max}$ ] respectively. Assuming that the percentage of B ions that have an oxidation state of  $+n_{B\_min}$  is  $P$ , and the percentage of  $n_{B\_max}$  should be  $1 - P$ , then we have

$$n_B = P \cdot n_{B\_min} + (1 - P) \cdot n_{B\_max} \quad (4)$$

$$\Rightarrow P = \frac{n_{B\_max} - n_B}{n_{B\_max} - n_{B\_min}} \quad (5)$$

For different oxidation state, the radiuses of B ions are different. Normally, a larger oxidation state should correspond to a lower radius. Therefore  $n_{B\_max}$  corresponds to  $r_{B\_min}$  and  $n_{B\_min}$  corresponds to  $r_{B\_max}$ . Then we can calculate the average radius of B ( $r_B$ ) by

$$r_B = P \cdot r_{B\_max} + (1 - P) \cdot r_{B\_min} \quad (6)$$

$$\Rightarrow r_B = \frac{n_{B\_max} \cdot r_{B\_max} - n_{B\_min} \cdot r_{B\_min}}{n_{B\_max} - n_{B\_min}} - \frac{r_{B\_max} - r_{B\_min}}{n_{B\_max} - n_{B\_min}} \cdot n_B \quad (7)$$

Here we define  $\frac{n_{B\_max} \cdot r_{B\_max} - n_{B\_min} \cdot r_{B\_min}}{n_{B\_max} - n_{B\_min}} = C_1$  and  $\frac{r_{B\_max} - r_{B\_min}}{n_{B\_max} - n_{B\_min}} = C_2$ , for a given

composition,  $C_1$  and  $C_2$  are constants. Then eq. (7) can be written as

$$r_B = C_1 - C_2 \cdot n_B \quad (8)$$

On the other side, to make the  $Sr_x^{2+} A_{1-x}^{n_A+} Fe_y^{n_{Fe}+} B_{1-y}^{n_B+} O_{3-\delta}^{2-}$  crystal neutral, we have

$$2x + n_A \cdot (1-x) + n_{Fe} \cdot y + n_B \cdot (1-y) = 2 \cdot (3-\delta) \quad (9)$$

$$\Rightarrow n_{Fe} = \frac{6 - 2\delta - 2x - n_A \cdot (1-x)}{y} - \frac{1-y}{y} \cdot n_B \quad (10)$$

For a given composition, we can also define two constants  $\frac{6 - 2\delta - 2x - n_A \cdot (1-x)}{y} = C_3$  and

$\frac{1-y}{y} = C_4$ . Then eq. 10 can be written as

$$n_{Fe} = C_3 - C_4 \cdot n_B \quad (11)$$

Since a higher oxidation state corresponds to a smaller ionic radius, the average radius of Fe can be written as

$$r_{Fe} = (4 - n_{Fe}) \cdot r_{Fe\_max} + (n_{Fe} - 3) \cdot r_{Fe\_min} \quad (12)$$

Inserting eq. 11 to eq. 12, then  $r_{Fe}$  can be written as a function of  $n_B$ :

$$r_{Fe} = (4 - C_3 - C_4 \cdot n_B) \cdot r_{Fe\_max} + (C_3 - C_4 \cdot n_B - 3) \cdot r_{Fe\_min} \quad (13)$$

Finally, the formula of  $\tau$  can be modified as

$$\tau = \frac{\left[ r_O \cdot \left( \frac{3-\delta}{3} \right) + r_{O_V} \cdot \frac{\delta}{3} \right]}{[r_{Fe} \cdot y + r_B \cdot (1-y)]} - [2x + n_A(1-x)] \left( 2x + n_A(1-x) - \frac{[r_{Sr} \cdot x + r_A \cdot (1-x)]/[r_{Sr} \cdot x + r_A \cdot (1-x)]}{\ln \{ [r_{Sr} \cdot x + r_A \cdot (1-x)] / [r_{Sr} \cdot x + r_A \cdot (1-x)] \}} \right) \quad (14)$$

Note that here both  $r_{Fe}$  and  $r_B$  can be written as functions of  $n_B$ ,  $\tau$  can thus be further modified as

$$\begin{aligned}
& \tau(n_A, n_B, x, y, \delta) \\
&= \frac{\left[ r_O \cdot \left( \frac{3-\delta}{3} \right) + r_{O_V} \cdot \frac{\delta}{3} \right]}{\left\{ [(4 - C_3 - C_4 \cdot n_B) \cdot r_{Fe\_max} + (C_3 - C_4 \cdot n_B - 3) \cdot r_{Fe\_min}] \cdot y + [C_1 - C_2 \cdot n_B] \cdot (1 - y) \right\}} - [2x + n_A] \\
& \left( 2x + n_A(1-x) - \frac{[r_{Sr} \cdot x + r_A \cdot (1-x)]}{\ln \left\{ \frac{[r_{Sr} \cdot x + r_A \cdot (1-x)]}{[(4 - C_3 - C_4 \cdot n_B) \cdot r_{Fe\_max} + (C_3 - C_4 \cdot n_B - 3) \cdot r_{Fe\_min}]} \right\}} \right)
\end{aligned} \tag{15}$$

For a given composition with a B-site element that has multiple oxidation states, all the parameters are constants except for  $n_B$ , which should be in the range of  $[n_{B\_min}, n_{B\_max}]$ . Therefore,  $\tau(n_A, n_B, x, y, \delta)$  should also be a range instead of a certain value. Since it is only a preliminary screening, we adopted a loose standard, that is if only the minimum value of  $\tau$  can be lower than the threshold value of 4.3, we classified it as a possible composition to form a perovskite structure.

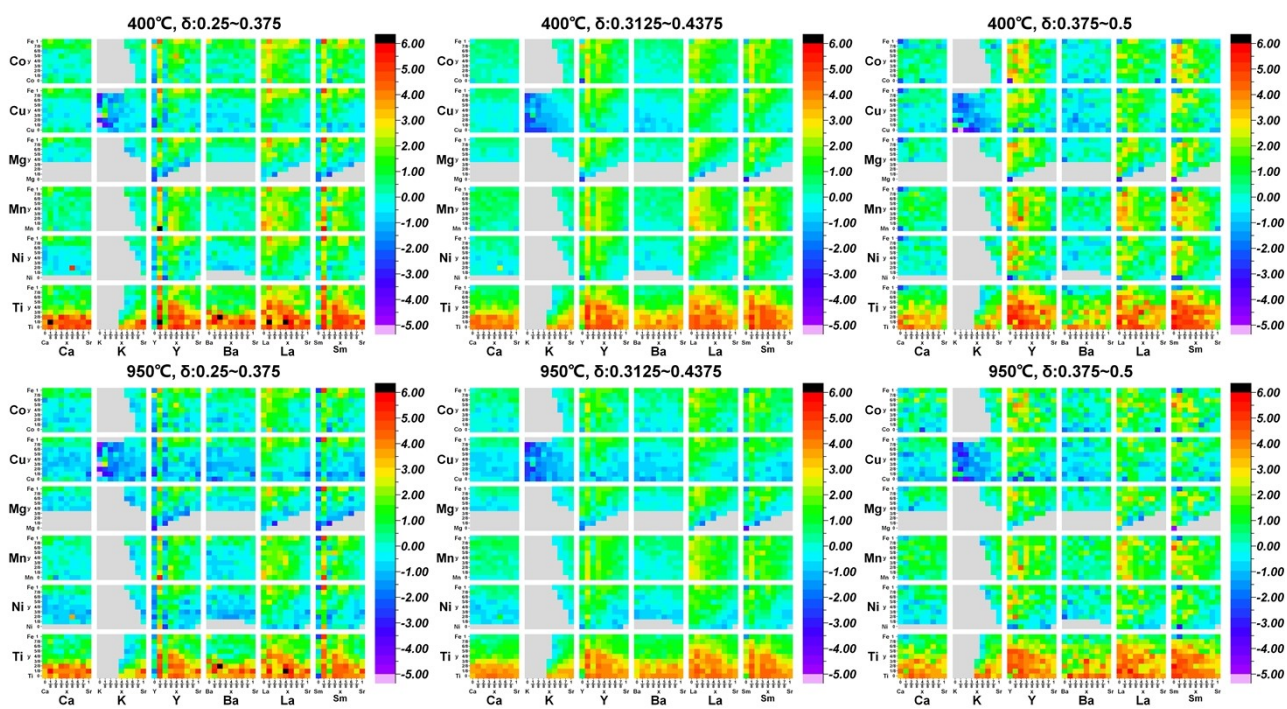

**Figure S2.** Heatmap of  $\Delta G$  for the 2003  $\text{Sr}_x\text{A}_{1-x}\text{Fe}_y\text{B}_{1-y}\text{O}_3$  candidates considered within  $\delta$  ranges of 0.25-0.375, 0.3125-0.4375 and 0.375-0.5 at 400 and 700 °C, respectively. The unit of  $\Delta G$ s is eV. The grey areas refer to the 398 excluded unstable compositions.



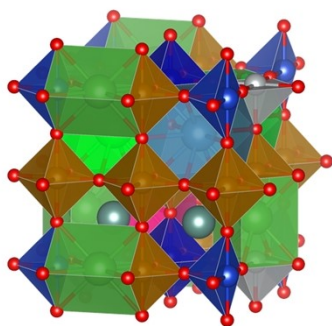

| Composition                      | Sr%   | Ba%   | Ca% | La% | K% | Y% | Sm% | Fe%   | Co% | Cu% | Mn% | Mg% | Ni%   | Ti%   |
|----------------------------------|-------|-------|-----|-----|----|----|-----|-------|-----|-----|-----|-----|-------|-------|
| SrBaFeNi-0.5-0.5-0.25-0.75       | 0.5   | 0.5   | 0   | 0   | 0  | 0  | 0   | 0.25  | 0   | 0   | 0   | 0   | 0.75  | 0     |
| SrBaFeNi-0.5-0.5-0.375-0.625     | 0.5   | 0.5   | 0   | 0   | 0  | 0  | 0   | 0.375 | 0   | 0   | 0   | 0   | 0.625 | 0     |
| SrBaFeNi-0.5-0.5-0.5-0.5         | 0.5   | 0.5   | 0   | 0   | 0  | 0  | 0   | 0.5   | 0   | 0   | 0   | 0   | 0.5   | 0     |
| SrBaFeNi-0.5-0.5-0.625-0.375     | 0.5   | 0.5   | 0   | 0   | 0  | 0  | 0   | 0.625 | 0   | 0   | 0   | 0   | 0.375 | 0     |
| SrBaFeNi-0.5-0.5-0.75-0.25       | 0.5   | 0.5   | 0   | 0   | 0  | 0  | 0   | 0.75  | 0   | 0   | 0   | 0   | 0.25  | 0     |
| SrBaFeNi-0.5-0.5-0.875-0.125     | 0.5   | 0.5   | 0   | 0   | 0  | 0  | 0   | 0.875 | 0   | 0   | 0   | 0   | 0.125 | 0     |
| SrBaFeNi-0.625-0.375-0.25-0.75   | 0.625 | 0.375 | 0   | 0   | 0  | 0  | 0   | 0.25  | 0   | 0   | 0   | 0   | 0.75  | 0     |
| SrBaFeNi-0.625-0.375-0.375-0.625 | 0.625 | 0.375 | 0   | 0   | 0  | 0  | 0   | 0.375 | 0   | 0   | 0   | 0   | 0.625 | 0     |
| SrBaFeNi-0.625-0.375-0.5-0.5     | 0.625 | 0.375 | 0   | 0   | 0  | 0  | 0   | 0.5   | 0   | 0   | 0   | 0   | 0.5   | 0     |
| SrBaFeNi-0.625-0.375-0.625-0.375 | 0.625 | 0.375 | 0   | 0   | 0  | 0  | 0   | 0.625 | 0   | 0   | 0   | 0   | 0.375 | 0     |
| SrBaFeNi-0.625-0.375-0.75-0.25   | 0.625 | 0.375 | 0   | 0   | 0  | 0  | 0   | 0.75  | 0   | 0   | 0   | 0   | 0.25  | 0     |
| SrBaFeNi-0.625-0.375-0.875-0.125 | 0.625 | 0.375 | 0   | 0   | 0  | 0  | 0   | 0.875 | 0   | 0   | 0   | 0   | 0.125 | 0     |
| SrBaFeNi-0.75-0.25-0.25-0.75     | 0.75  | 0.25  | 0   | 0   | 0  | 0  | 0   | 0.25  | 0   | 0   | 0   | 0   | 0.75  | 0     |
| SrBaFeNi-0.75-0.25-0.375-0.625   | 0.75  | 0.25  | 0   | 0   | 0  | 0  | 0   | 0.375 | 0   | 0   | 0   | 0   | 0.625 | 0     |
| SrBaFeNi-0.75-0.25-0.5-0.5       | 0.75  | 0.25  | 0   | 0   | 0  | 0  | 0   | 0.5   | 0   | 0   | 0   | 0   | 0.5   | 0     |
| SrBaFeNi-0.75-0.25-0.625-0.375   | 0.75  | 0.25  | 0   | 0   | 0  | 0  | 0   | 0.625 | 0   | 0   | 0   | 0   | 0.375 | 0     |
| SrBaFeNi-0.75-0.25-0.75-0.25     | 0.75  | 0.25  | 0   | 0   | 0  | 0  | 0   | 0.75  | 0   | 0   | 0   | 0   | 0.25  | 0     |
| SrBaFeNi-0.75-0.25-0.875-0.125   | 0.75  | 0.25  | 0   | 0   | 0  | 0  | 0   | 0.875 | 0   | 0   | 0   | 0   | 0.125 | 0     |
| SrBaFeNi-0.875-0.125-0.125-0.875 | 0.875 | 0.125 | 0   | 0   | 0  | 0  | 0   | 0.125 | 0   | 0   | 0   | 0   | 0.875 | 0     |
| SrBaFeNi-0.875-0.125-0.25-0.75   | 0.875 | 0.125 | 0   | 0   | 0  | 0  | 0   | 0.25  | 0   | 0   | 0   | 0   | 0.75  | 0     |
| SrBaFeNi-0.875-0.125-0.375-0.625 | 0.875 | 0.125 | 0   | 0   | 0  | 0  | 0   | 0.375 | 0   | 0   | 0   | 0   | 0.625 | 0     |
| SrBaFeNi-0.875-0.125-0.5-0.5     | 0.875 | 0.125 | 0   | 0   | 0  | 0  | 0   | 0.5   | 0   | 0   | 0   | 0   | 0.5   | 0     |
| SrBaFeNi-0.875-0.125-0.625-0.375 | 0.875 | 0.125 | 0   | 0   | 0  | 0  | 0   | 0.625 | 0   | 0   | 0   | 0   | 0.375 | 0     |
| SrBaFeNi-0.875-0.125-0.75-0.25   | 0.875 | 0.125 | 0   | 0   | 0  | 0  | 0   | 0.75  | 0   | 0   | 0   | 0   | 0.25  | 0     |
| SrBaFeNi-0.875-0.125-0.875-0.125 | 0.875 | 0.125 | 0   | 0   | 0  | 0  | 0   | 0.875 | 0   | 0   | 0   | 0   | 0.125 | 0     |
| SrBaFeTi-0.125-0.875-0.125-0.875 | 0.125 | 0.875 | 0   | 0   | 0  | 0  | 0   | 0.125 | 0   | 0   | 0   | 0   | 0     | 0.875 |
| SrBaFeTi-0.125-0.875-0.25-0.75   | 0.125 | 0.875 | 0   | 0   | 0  | 0  | 0   | 0.25  | 0   | 0   | 0   | 0   | 0     | 0.75  |
| SrBaFeTi-0.125-0.875-0.375-0.625 | 0.125 | 0.875 | 0   | 0   | 0  | 0  | 0   | 0.375 | 0   | 0   | 0   | 0   | 0     | 0.625 |
| SrBaFeTi-0.125-0.875-0.5-0.5     | 0.125 | 0.875 | 0   | 0   | 0  | 0  | 0   | 0.5   | 0   | 0   | 0   | 0   | 0     | 0.5   |
| SrBaFeTi-0.125-0.875-0.625-0.375 | 0.125 | 0.875 | 0   | 0   | 0  | 0  | 0   | 0.625 | 0   | 0   | 0   | 0   | 0     | 0.375 |

Figure S3. Example format of the input features.



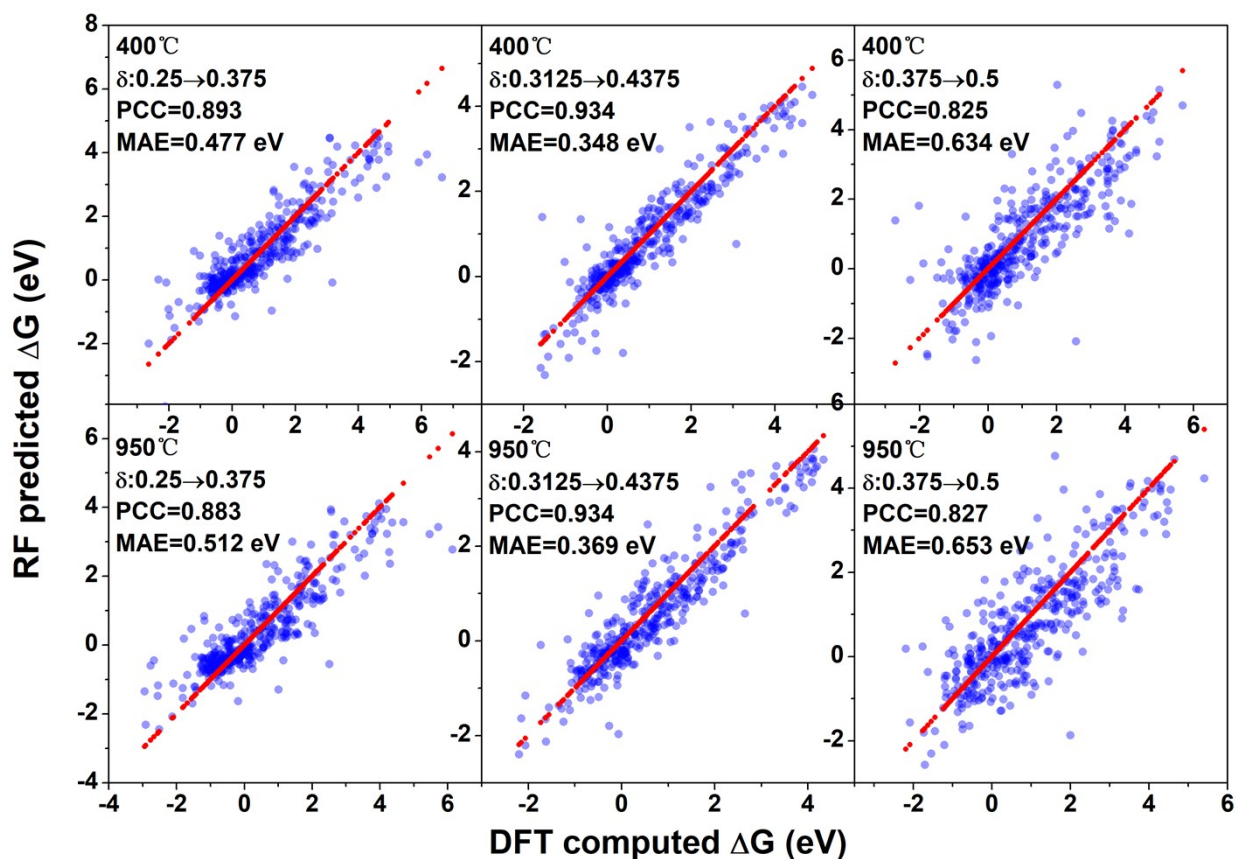

**Figure S4.** Comparison of  $\Delta G$  values computed by DFT with those predicted by RF within studied  $\delta$  ranges at 400 and 950 °C. Here the proportion of each cation element, the average charge ( $\Delta e$ ) and p-band center ( $\epsilon_p$ ) of oxygen anions are used as the input features. The overall prediction performances are comparable with those using only the proportion of each cation element as the input features.

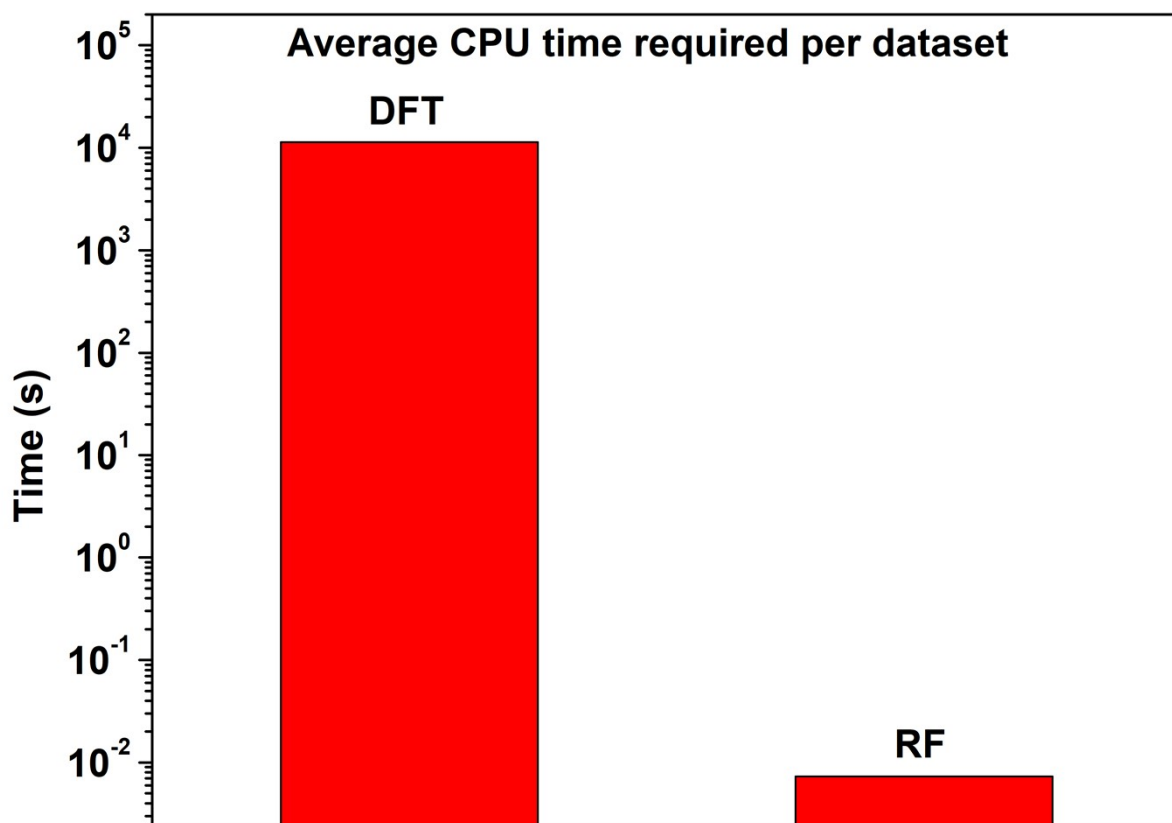

**Figure S5.** Comparison of the average time consumption of DFT and RF to produce a set of target  $\Delta G$ s.

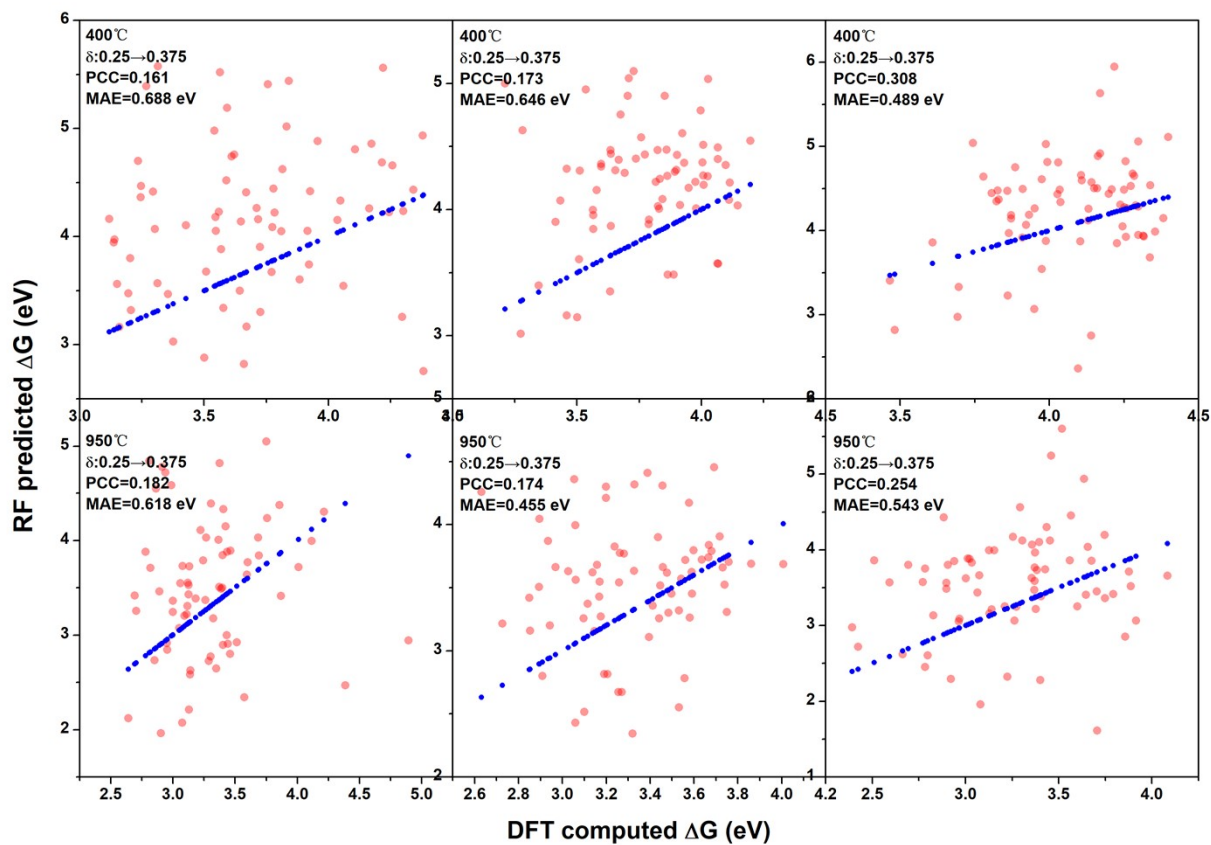

**Figure S6.** Comparison of DFT computed and RF  $\Delta G$ s at 400 and 950 °C. Here the 2003 samples containing 2, 3 and 4 cation elements are used as the training sets and the RF model are transferred to predict the  $\Delta G$ s of new samples containing 6 or more cation elements.

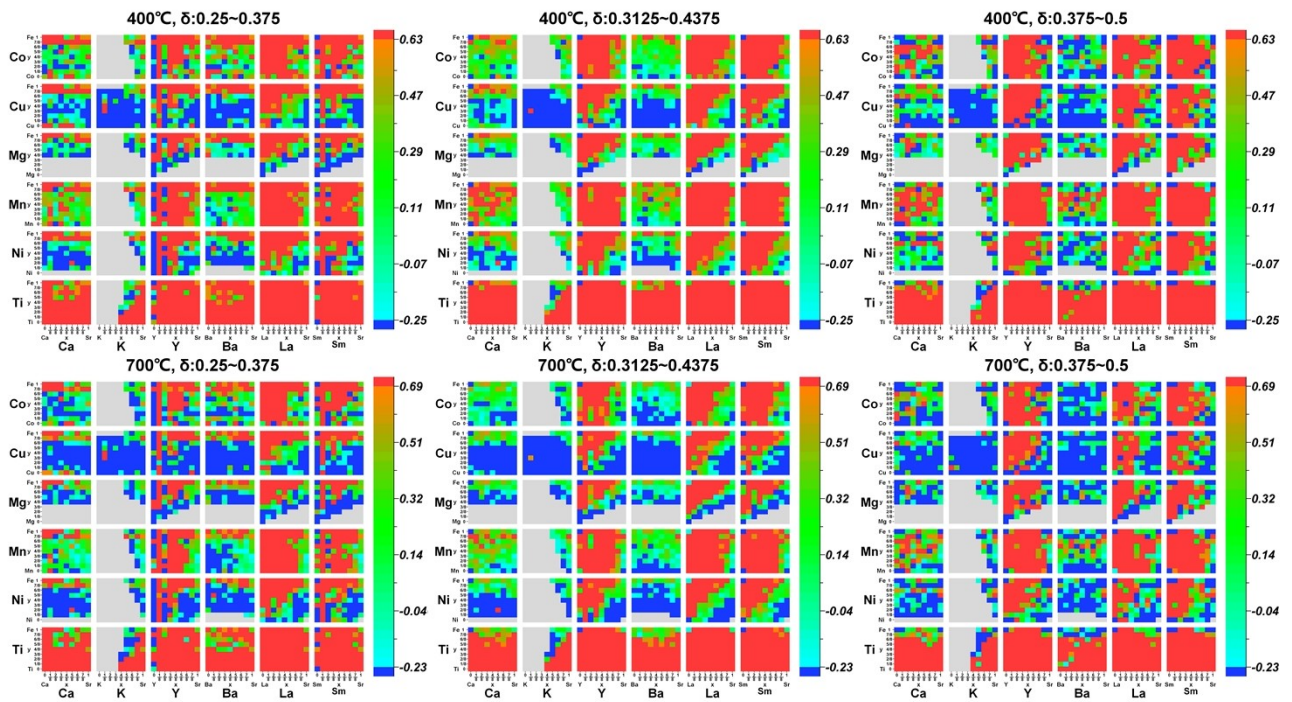

**Figure S7.** Heatmap of the promising candidates for CLAS. The target  $\Delta G$  is set to  $-0.25 - 0.63$  eV at  $400^\circ\text{C}$  and  $-0.23 - 0.69$  eV at  $700^\circ\text{C}$  respectively.

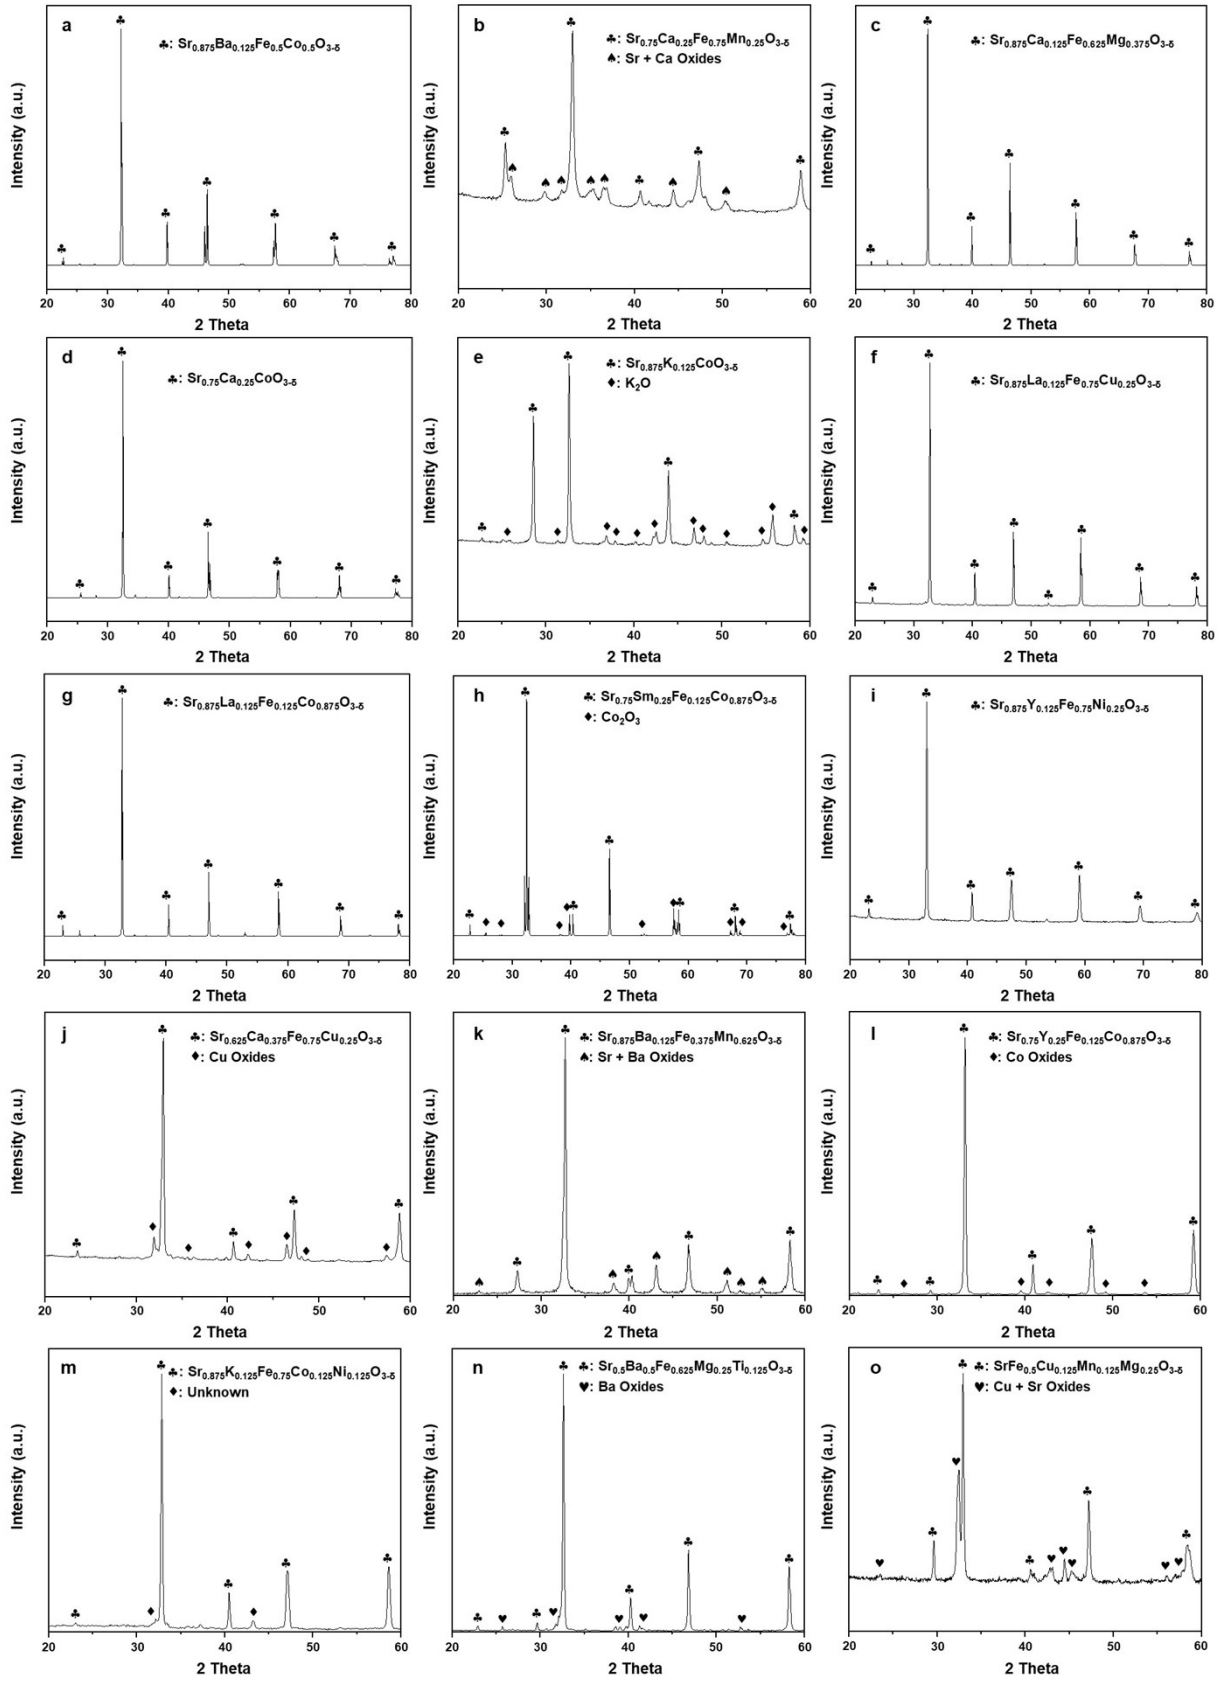

**Figure S8.** (a) to (o): Experimental XRD patterns of the as-prepared perovskites for CLAS. All samples showed main phases of perovskites. Some showed minor impurities of metal oxides.

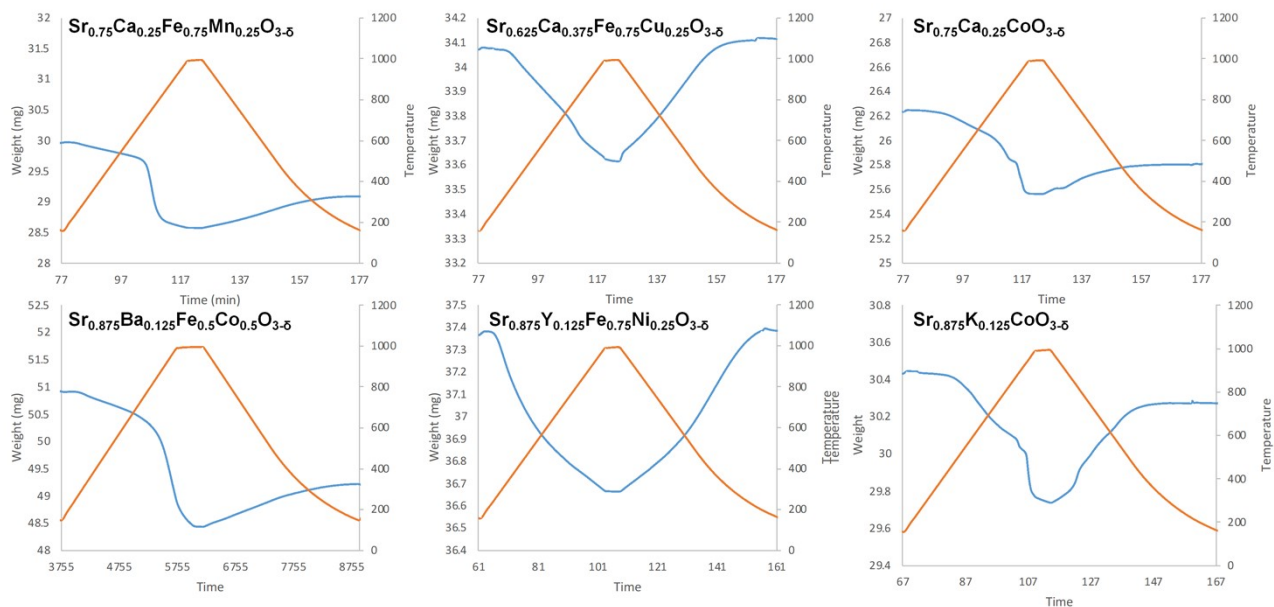

**Figure S9.** TGA results of six selected samples, where blue and orange lines represent the weights and temperatures.



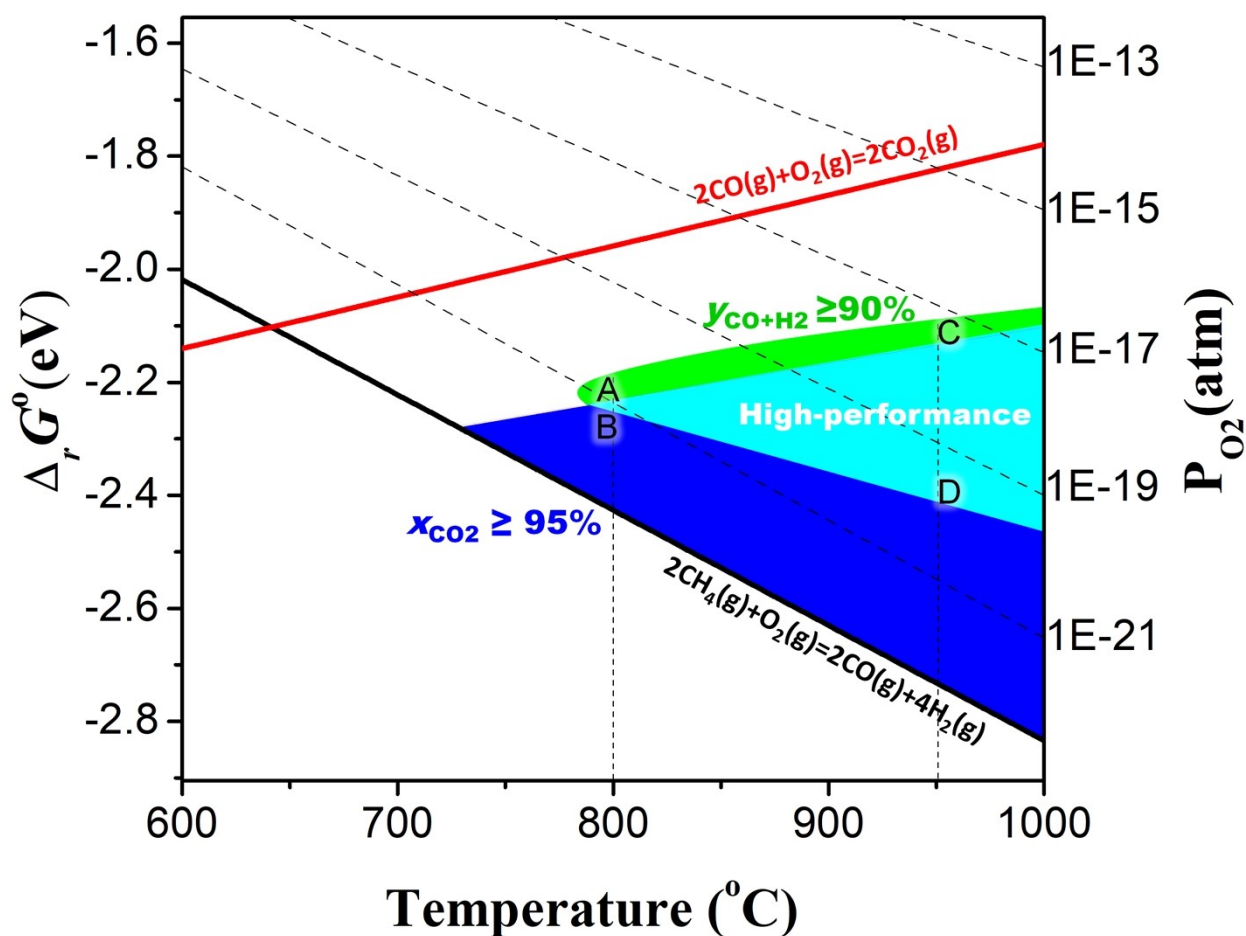

**Figure S10.** Thermodynamic analysis of methane PO<sub>x</sub>/CO<sub>2</sub>-splitting reactions. Standard Gibbs free energy change ( $\Delta_r G^\circ$ ) of the oxidation reactions and corresponding equilibrium oxygen partial pressures ( $P_{O_2}$ ) for  $\geq 95\%$  CO<sub>2</sub> conversions (blue region) and  $\geq 90\%$  methane-to-syngas yield (green region) at 1 atm. The overlapping (cyan) zone is the ideal (high performance) region for both methane P<sub>O<sub>x</sub></sub> and CO<sub>2</sub>-splitting reactions.



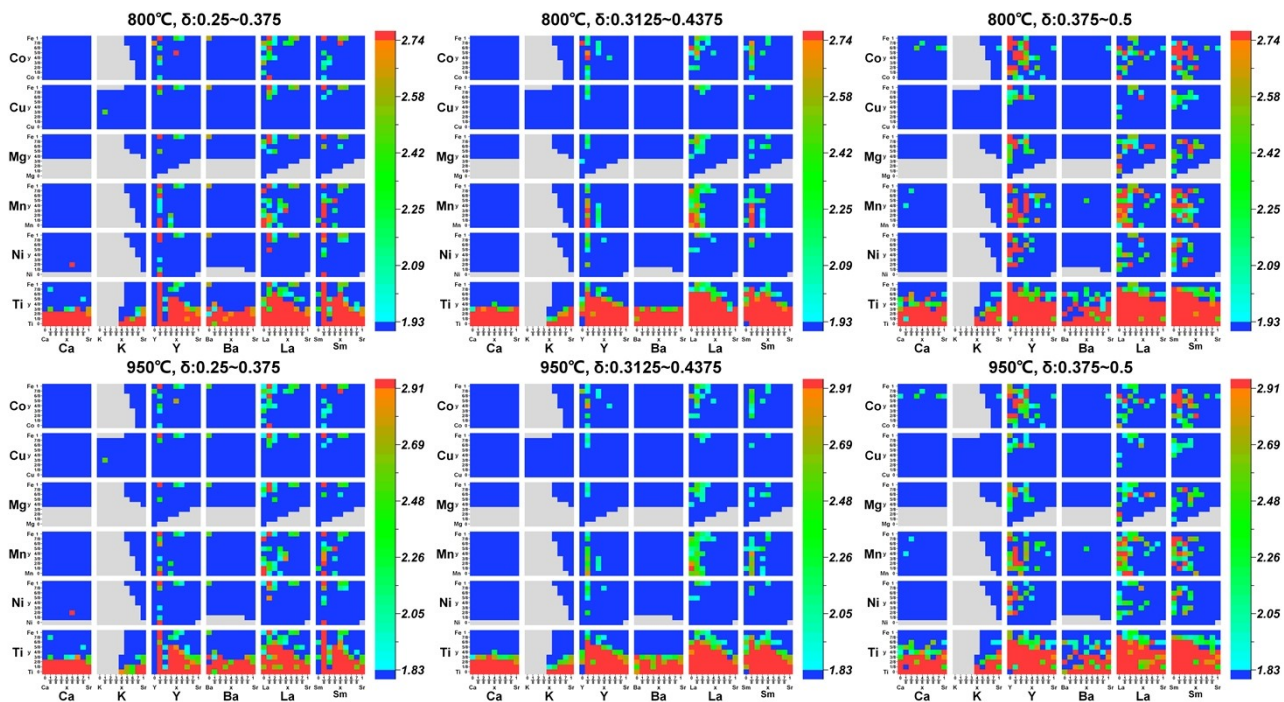

**Figure S11.** Heatmap of the promising candidates for CL  $\text{CO}_2/\text{H}_2\text{O}$  splitting. The target  $\Delta G$  is set to 1.93 – 2.74 eV at 800 °C and 1.83 – 2.91 eV at 950 °C.

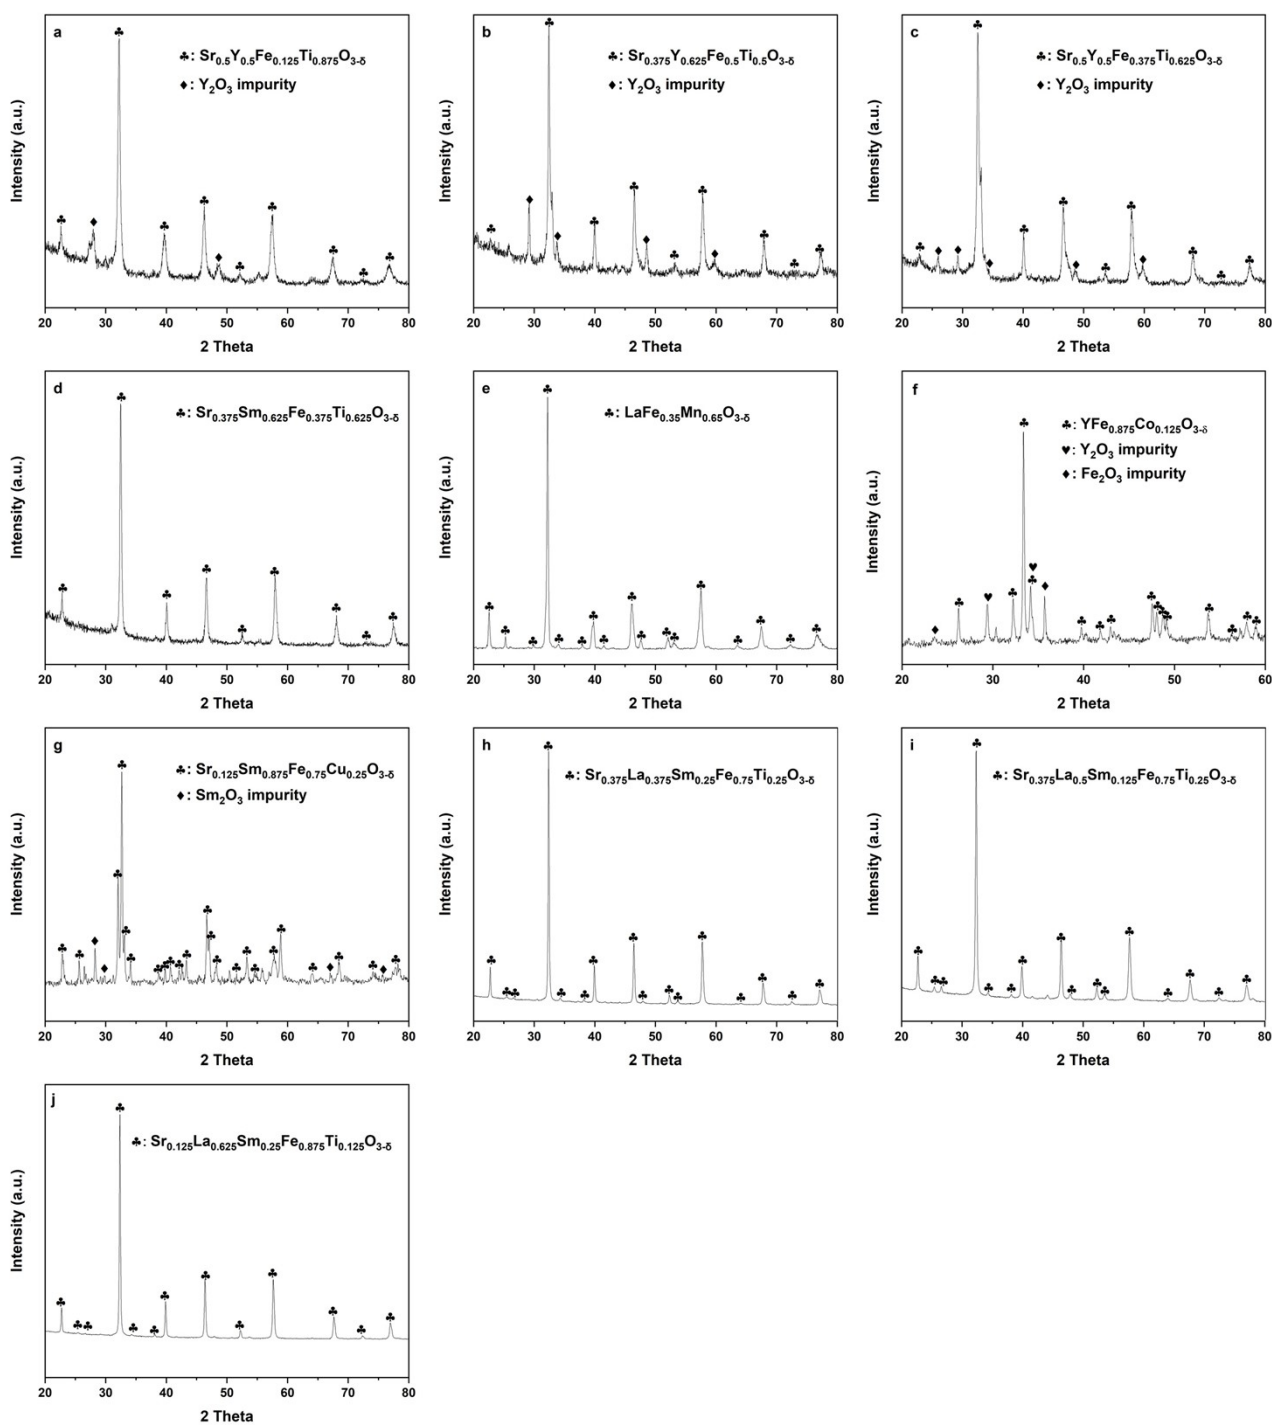

**Figure S12.** (a) to (j): Experimental XRD patterns of as-prepared perovskites for CL  $\text{CO}_2$  splitting. All samples showed main phases of perovskites. Some showed minor impurities of metal oxides.

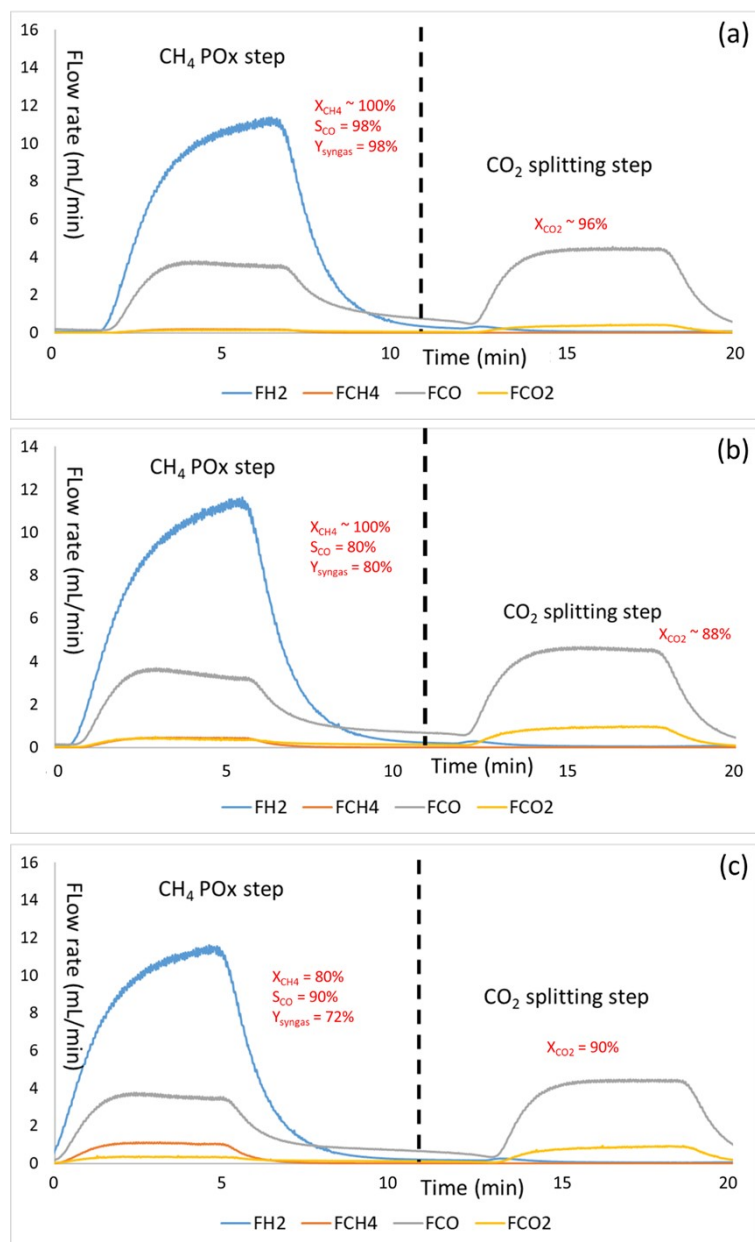

**Figure S13.** Calibrated MS data of (a) Sr<sub>0.375</sub>Sm<sub>0.625</sub>Fe<sub>0.375</sub>Ti<sub>0.625</sub>O<sub>3-δ</sub>, (b) YFe<sub>0.875</sub>Co<sub>0.125</sub>O<sub>3-δ</sub> and (c) Sr<sub>0.125</sub>La<sub>0.625</sub>Sm<sub>0.25</sub>Fe<sub>0.875</sub>Ti<sub>0.125</sub>O<sub>3-δ</sub>. Temperature is set to 950 °C

**Table S3.** Comparison of experimental and DFT computed  $\Delta G$  for some case-studies.

| T (°C) | Exp vs. DFT Composition                                                                                             | Exp P <sub>O2</sub> swing | Exp $\delta$ change | Exp $\Delta G$ (eV) | DFT $\delta$ change | DFT $\Delta G$ (eV) | Error (eV) |
|--------|---------------------------------------------------------------------------------------------------------------------|---------------------------|---------------------|---------------------|---------------------|---------------------|------------|
| 700    | Sr <sub>0.8</sub> Ca <sub>0.2</sub> FeO <sub>3-<math>\delta</math></sub> (Ref. 7)                                   | 0.50 –                    | 0.34 –              | 0.11                | 0.375 –             | 0.19                | 0.08       |
|        | Sr <sub>0.75</sub> Ca <sub>0.25</sub> FeO <sub>3-<math>\delta</math></sub>                                          | 0.01                      | 0.50                |                     | 0.5                 |                     |            |
|        | Sr <sub>0.8</sub> Ca <sub>0.2</sub> Fe <sub>0.4</sub> Co <sub>0.6</sub> O <sub>3-<math>\delta</math></sub> (Ref. 7) | 0.50 –                    | 0.34 –              |                     |                     |                     |            |
| 700    | Sr <sub>0.75</sub> Ca <sub>0.25</sub> Fe <sub>0.375</sub> Co <sub>0.625</sub> O <sub>3-<math>\delta</math></sub>    | 0.01                      | 0.42                | 0.11                | 0.3125 –            | -                   | -0.11      |
|        |                                                                                                                     |                           |                     |                     | 0.4375              | 0.001               |            |
| 800    | Sr <sub>0.4</sub> La <sub>0.6</sub> CoO <sub>3-<math>\delta</math></sub> (Ref. 8)                                   | 0.20 –                    | 0.08 –              | 0.30                | 0.0625 –            | -0.30               | -0.60      |
|        | Sr <sub>0.375</sub> La <sub>0.625</sub> CoO <sub>3-<math>\delta</math></sub>                                        | 3.16E-04                  | 0.17                |                     | 0.1875              |                     |            |
| 800    | Sr <sub>0.4</sub> La <sub>0.6</sub> CoO <sub>3-<math>\delta</math></sub> (Ref. 9)                                   | 1.58 –                    | 0.08 –              | 0.20                | 0.0625 –            | -0.30               | -0.50      |
|        | Sr <sub>0.375</sub> La <sub>0.625</sub> CoO <sub>3-<math>\delta</math></sub>                                        | 0.02                      | 0.14                |                     | 0.1875              |                     |            |
| 800    | Sr <sub>0.4</sub> La <sub>0.6</sub> CoO <sub>3-<math>\delta</math></sub> (Ref. 8)                                   | 2.5E-03 –                 | 0.135 –             | 0.28                | 0.125 –             | -0.22               | -0.50      |
|        | Sr <sub>0.375</sub> La <sub>0.625</sub> CoO <sub>3-<math>\delta</math></sub>                                        | 6.61E-06                  | 0.25                |                     | 0.25                |                     |            |
| 800    | Sr <sub>0.4</sub> La <sub>0.6</sub> FeO <sub>3-<math>\delta</math></sub> (Ref. 10)                                  | 1 –                       | 0 – 0.3             | 2.18                | 0 – 0.25            | 2.33                | 0.15       |
|        | Sr <sub>0.375</sub> La <sub>0.625</sub> FeO <sub>3-<math>\delta</math></sub>                                        | 3.16E-21                  |                     |                     |                     |                     |            |
| 800    | Sr <sub>0.4</sub> La <sub>0.6</sub> FeO <sub>3-<math>\delta</math></sub> (Ref. 10)                                  | 1 –                       | 0 – 0.125           | 0.43                | 0 – 0.125           | 1.13                | 0.70       |
|        | Sr <sub>0.375</sub> La <sub>0.625</sub> FeO <sub>3-<math>\delta</math></sub>                                        | 1E-04                     |                     |                     |                     |                     |            |
| 800    | Sr <sub>0.4</sub> La <sub>0.6</sub> FeO <sub>3-<math>\delta</math></sub> (Ref. 10)                                  | 1E-04 –                   | 0.125 –             | 1.76                | 0.125 –             | 1.20                | -0.56      |
|        | Sr <sub>0.375</sub> La <sub>0.625</sub> FeO <sub>3-<math>\delta</math></sub>                                        | 3.16E-21                  | 0.3                 |                     | 0.5                 |                     |            |
|        | Sr <sub>0.8</sub> Ca <sub>0.2</sub> Fe <sub>0.9</sub> Co <sub>0.1</sub> O <sub>3-<math>\delta</math></sub>          | 0.5 –                     | 0.33 –              |                     |                     |                     |            |
| 650    | Sr <sub>0.75</sub> Ca <sub>0.25</sub> Fe <sub>0.875</sub> Co <sub>0.125</sub> O <sub>3-<math>\delta</math></sub>    | 2.1E-03                   | 0.48                | 0.25                | 0.375 –             | 0.30                | 0.05       |
|        |                                                                                                                     |                           |                     |                     | 0.5                 |                     |            |

**Table S4.** 1,270 promising candidates screened by the DFT computed  $\Delta G_{0.25 \rightarrow 0.375}$ ,  $\Delta G_{0.375 \rightarrow 0.5}$ , or  $\Delta G_{0.3125 \rightarrow 0.4375}$  for CL H<sub>2</sub>O/CO<sub>2</sub> splitting at 400 or 700 °C. Herein, so long as one of these  $\Delta G$ s is within the target range, the corresponding material is considered as promising.

| $\Delta G$ (eV)             | T = 400 °C |            |           | T = 700 °C    |            |           |               |
|-----------------------------|------------|------------|-----------|---------------|------------|-----------|---------------|
|                             | $\delta$   | 0.25-0.375 | 0.375-0.5 | 0.3125-0.4375 | 0.25-0.375 | 0.375-0.5 | 0.3125-0.4375 |
| <i>BaCo-1-1</i>             |            | 1.16438    | -1.14058  | 0.0119        | 1.0614     | -1.48263  | -0.21062      |
| <i>BaFe-1-1</i>             |            | 2.85695    | -1.61555  | 0.6207        | 2.67809    | -1.885    | 0.39655       |
| <i>BaFeCo-1-0.125-0.875</i> |            | 0.70723    | -0.07213  | 0.31755       | 0.36652    | -0.24117  | 0.06268       |
| <i>BaFeCo-1-0.375-0.625</i> |            | 0.4005     | -0.23343  | 0.08353       | 0.1217     | -0.62768  | -0.25299      |
| <i>BaFeCo-1-0.5-0.5</i>     |            | 0.19276    | -0.18244  | 0.00516       | -0.15327   | -0.30549  | -0.22938      |
| <i>BaFeCo-1-0.625-0.375</i> |            | -0.22369   | 0.64158   | 0.20894       | -0.58581   | 0.40316   | -0.09132      |
| <i>BaFeCo-1-0.75-0.25</i>   |            | 1.11941    | -0.34773  | 0.38584       | 0.82059    | -0.48629  | 0.16715       |
| <i>BaFeCo-1-0.875-0.125</i> |            | 0.48271    | 0.33693   | 0.40982       | -0.03574   | 0.28383   | 0.12405       |
| <i>BaFeCu-1-0.625-0.375</i> |            | -0.93344   | 0.10234   | -0.41555      | -1.09343   | -0.21454  | -0.65398      |
| <i>BaFeCu-1-0.75-0.25</i>   |            | -0.45827   | 0.57793   | 0.05983       | -0.78637   | 0.28229   | -0.25204      |
| <i>BaFeCu-1-0.875-0.125</i> |            | 0.59912    | -0.86185  | -0.13137      | 0.35965    | -1.14703  | -0.39369      |
| <i>BaFeMg-1-0.5-0.5</i>     |            | 0.74246    | -1.89312  | -0.57533      | 0.47357    | -2.30066  | -0.91355      |
| <i>BaFeMg-1-0.625-0.375</i> |            | 0.53185    | -0.19695  | 0.16745       | 0.30853    | -0.39437  | -0.04292      |
| <i>BaFeMg-1-0.75-0.25</i>   |            | -0.09611   | 0.07291   | -0.0116       | -0.38415   | -0.31928  | -0.35171      |
| <i>BaFeMg-1-0.875-0.125</i> |            | 0.58744    | -0.53063  | 0.0284        | 0.37125    | -0.75209  | -0.19042      |
| <i>BaFeMn-1-0.125-0.875</i> |            | -0.10914   | 0.12262   | 0.00674       | -0.29702   | -0.06447  | -0.18074      |
| <i>BaFeMn-1-0.25-0.75</i>   |            | -0.16598   | 0.33104   | 0.08253       | -0.27888   | 0.16696   | -0.05596      |
| <i>BaFeMn-1-0.375-0.625</i> |            | -0.35834   | 0.66648   | 0.15407       | -0.60701   | 0.3941    | -0.10646      |
| <i>BaFeMn-1-0.5-0.5</i>     |            | 0.0476     | 0.50842   | 0.27801       | -0.26383   | 0.24863   | -0.0076       |
| <i>BaFeMn-1-0.625-0.375</i> |            | -0.91537   | 0.94706   | 0.01584       | -1.28117   | 0.77511   | -0.25303      |
| <i>BaFeMn-1-0.75-0.25</i>   |            | 0.3257     | 0.73335   | 0.52952       | 0.16404    | 0.56926   | 0.36665       |

|                             |          |          |          |          |          |          |
|-----------------------------|----------|----------|----------|----------|----------|----------|
| <i>BaFeMn-1-0.875-0.125</i> | 0.80946  | 0.12077  | 0.46511  | 0.67267  | 0.03015  | 0.35141  |
| <i>BaFeNi-1-0.25-0.75</i>   | 0.32579  | -1.57537 | -0.62479 | 0.20688  | -1.9348  | -0.86396 |
| <i>BaFeNi-1-0.625-0.375</i> | -0.28437 | 0.00972  | -0.13733 | -0.37076 | -0.08328 | -0.22702 |
| <i>BaFeNi-1-0.75-0.25</i>   | -0.04493 | -0.50168 | -0.27331 | -0.35772 | -0.84876 | -0.60324 |
| <i>BaFeNi-1-0.875-0.125</i> | -0.09304 | 0.62585  | 0.26641  | -0.35523 | 0.47584  | 0.06031  |
| <i>BaFeTi-1-0.125-0.875</i> | 4.22557  | 0.70694  | 2.46625  | 3.9473   | 0.39592  | 2.17161  |
| <i>BaFeTi-1-0.625-0.375</i> | 0.60764  | 1.77918  | 1.19341  | 0.31672  | 1.65916  | 0.98794  |
| <i>BaFeTi-1-0.75-0.25</i>   | 0.57206  | 1.22421  | 0.89813  | 0.27214  | 1.18301  | 0.72757  |
| <i>BaFeTi-1-0.875-0.125</i> | 0.5933   | 0.36382  | 0.47856  | 0.49613  | 0.08819  | 0.29216  |
| <i>BaMn-1-1</i>             | -0.24905 | -0.05718 | -0.15312 | -0.58558 | -0.07811 | -0.33185 |
| <i>CaCo-1-1</i>             | 0.42393  | -2.2126  | -0.89433 | 0.31166  | -2.27912 | -0.98373 |
| <i>CaCu-1-1</i>             | 0.8609   | -0.80706 | 0.02692  | 0.6629   | -1.23487 | -0.28599 |
| <i>CaFeCo-1-0.125-0.875</i> | -0.74073 | 1.10917  | 0.18422  | -0.91514 | 0.78323  | -0.06596 |
| <i>CaFeCo-1-0.25-0.75</i>   | -0.35904 | 0.95878  | 0.29987  | -0.53311 | 0.71409  | 0.09049  |
| <i>CaFeCo-1-0.375-0.625</i> | -0.12815 | 0.38195  | 0.1269   | -0.35794 | 0.02761  | -0.16516 |
| <i>CaFeCo-1-0.5-0.5</i>     | 0.08972  | 0.56377  | 0.32674  | -0.03696 | 0.33952  | 0.15128  |
| <i>CaFeCo-1-0.625-0.375</i> | 0.03179  | 0.78539  | 0.40859  | -0.07586 | 0.52648  | 0.22531  |
| <i>CaFeCo-1-0.75-0.25</i>   | -0.7887  | 1.26829  | 0.2398   | -1.18838 | 1.23418  | 0.0229   |
| <i>CaFeCo-1-0.875-0.125</i> | 1.49102  | -0.10372 | 0.69365  | 1.33975  | -0.27798 | 0.53089  |
| <i>CaFeCu-1-0.125-0.875</i> | -0.26545 | 0.55776  | 0.14616  | -0.65333 | 0.3838   | -0.13477 |
| <i>CaFeCu-1-0.25-0.75</i>   | -0.63593 | 0.26453  | -0.1857  | -0.95263 | -0.01839 | -0.48551 |
| <i>CaFeCu-1-0.375-0.625</i> | -0.25603 | 0.13575  | -0.06014 | -0.6216  | -0.07167 | -0.34664 |
| <i>CaFeCu-1-0.5-0.5</i>     | -0.7093  | 0.54846  | -0.08042 | -1.02472 | 0.19135  | -0.41668 |
| <i>CaFeCu-1-0.625-0.375</i> | -0.236   | -0.64878 | -0.44239 | -0.44392 | -0.93573 | -0.68982 |
| <i>CaFeCu-1-0.75-0.25</i>   | -0.1948  | 1.19186  | 0.49853  | -0.43165 | 0.96705  | 0.2677   |
| <i>CaFeCu-1-0.875-0.125</i> | 0.80578  | 0.04679  | 0.42629  | 0.53916  | -0.07066 | 0.23425  |
| <i>CaFeMg-1-0.5-0.5</i>     | -0.55555 | -0.22257 | -0.38906 | -0.69765 | -0.46353 | -0.58059 |
| <i>CaFeMg-1-0.625-0.375</i> | -0.06125 | -0.05743 | -0.05934 | -0.21576 | -0.3239  | -0.26983 |
| <i>CaFeMg-1-0.75-0.25</i>   | -0.08439 | -0.04737 | -0.06588 | -0.39441 | -0.30828 | -0.35134 |
| <i>CaFeMg-1-0.875-0.125</i> | 1.08829  | -0.42608 | 0.33111  | 0.87171  | -0.58092 | 0.1454   |
| <i>CaFeMn-1-0.125-0.875</i> | 0.27732  | 0.71024  | 0.49378  | 0.14673  | 0.45024  | 0.29849  |
| <i>CaFeMn-1-0.25-0.75</i>   | -0.00386 | 1.3117   | 0.65392  | -0.16165 | 1.00298  | 0.42067  |
| <i>CaFeMn-1-0.375-0.625</i> | -0.07703 | 0.44137  | 0.18217  | -0.25451 | 0.19047  | -0.03202 |
| <i>CaFeMn-1-0.5-0.5</i>     | 0.49117  | 0.75322  | 0.62219  | 0.31955  | 0.4902   | 0.40488  |
| <i>CaFeMn-1-0.625-0.375</i> | 0.50979  | 0.4605   | 0.48514  | 0.30081  | 0.15275  | 0.22678  |
| <i>CaFeMn-1-0.75-0.25</i>   | 0.43608  | 0.86606  | 0.65107  | 0.19973  | 0.71042  | 0.45507  |
| <i>CaFeMn-1-0.875-0.125</i> | 1.54013  | 0.32667  | 0.9334   | 1.33891  | 0.17699  | 0.75795  |
| <i>CaFeNi-1-0.125-0.875</i> | -0.16017 | -0.14804 | -0.1541  | -0.34066 | -0.36655 | -0.3536  |
| <i>CaFeNi-1-0.25-0.75</i>   | -0.38989 | 0.05014  | -0.16987 | -0.46251 | -0.33149 | -0.397   |
| <i>CaFeNi-1-0.375-0.625</i> | -0.69818 | 0.19112  | -0.25353 | -0.9673  | 0.01325  | -0.47702 |
| <i>CaFeNi-1-0.5-0.5</i>     | -1.00558 | 0.09943  | -0.45307 | -1.15321 | -0.13811 | -0.64566 |
| <i>CaFeNi-1-0.625-0.375</i> | -0.96882 | 0.32089  | -0.32397 | -1.11465 | 0.09231  | -0.51117 |
| <i>CaFeNi-1-0.75-0.25</i>   | -0.60333 | 0.81391  | 0.10529  | -0.83737 | 0.59809  | -0.11964 |
| <i>CaFeNi-1-0.875-0.125</i> | 0.6765   | 0.15928  | 0.41789  | 0.51411  | -0.09706 | 0.20853  |
| <i>CaFeTi-1-0.875-0.125</i> | 1.03158  | 0.62775  | 0.82966  | 0.91106  | 0.4979   | 0.70448  |
| <i>CaMn-1-1</i>             | 0.48701  | -2.27288 | -0.89293 | 0.13592  | -2.61456 | -1.23932 |
| <i>KFeCu-1-0.375-0.625</i>  | -5.171   | -0.11781 | -2.6444  | -5.50181 | 0.23681  | -2.6325  |
| <i>LaCo-1-1</i>             | 0.44555  | -0.25296 | 0.09629  | 0.06024  | -0.65207 | -0.29591 |

|                             |          |          |          |          |          |          |
|-----------------------------|----------|----------|----------|----------|----------|----------|
| <i>LaCu-1-1</i>             | 0.58164  | 0.3715   | 0.47657  | 0.07186  | 0.07078  | 0.07132  |
| <i>LaFe-1-1</i>             | 1.82247  | -1.35942 | 0.23152  | 1.82676  | -2.15474 | -0.16399 |
| <i>LaFeCo-1-0.125-0.875</i> | 2.4354   | 0.9721   | 1.70375  | 2.21254  | 0.62257  | 1.41755  |
| <i>LaFeCo-1-0.375-0.625</i> | 2.87172  | 1.00804  | 1.93988  | 2.63147  | 0.61914  | 1.6253   |
| <i>LaFeCo-1-0.5-0.5</i>     | 2.38677  | 1.00868  | 1.69773  | 2.11206  | 0.57619  | 1.34413  |
| <i>LaFeCu-1-0.25-0.75</i>   | 0.20093  | 2.86671  | 1.53382  | -0.02896 | 2.4941   | 1.23257  |
| <i>LaFeMg-1-0.125-0.875</i> | -0.70107 | 1.82106  | 0.56     | -0.85829 | 1.46952  | 0.30561  |
| <i>LaFeMg-1-0.375-0.625</i> | 0.59471  | 1.42052  | 1.00762  | 0.34482  | 1.09186  | 0.71834  |
| <i>LaFeNi-1-0.125-0.875</i> | 0.75639  | 2.69909  | 1.72774  | 0.52826  | 2.37198  | 1.45012  |
| <i>LaFeNi-1-0.25-0.75</i>   | 0.13053  | 2.99104  | 1.56079  | -0.05258 | 2.64189  | 1.29466  |
| <i>LaMn-1-1</i>             | 3.57248  | 0.27926  | 1.92587  | 3.40228  | -0.17537 | 1.61345  |
| <i>LaNi-1-1</i>             | 0.09956  | -1.06531 | -0.48288 | -0.17052 | -1.46298 | -0.81675 |
| <i>SmCo-1-1</i>             | 0.75264  | -2.01899 | -0.63318 | 0.34149  | -2.62061 | -1.13956 |
| <i>SmFeCo-1-0.125-0.875</i> | 0.46085  | 2.19559  | 1.32822  | 0.08846  | 1.84776  | 0.96811  |
| <i>SmFeCo-1-0.25-0.75</i>   | 0.61393  | 3.22727  | 1.9206   | 0.35469  | 2.91548  | 1.63509  |
| <i>SmFeCo-1-0.375-0.625</i> | 0.07792  | 1.9353   | 1.00661  | -0.3079  | 1.55256  | 0.62233  |
| <i>SmFeCu-1-0.125-0.875</i> | -0.91781 | 1.54726  | 0.31472  | -1.39063 | 1.18923  | -0.1007  |
| <i>SmFeCu-1-0.25-0.75</i>   | -0.01994 | 1.85179  | 0.91592  | -0.33241 | 1.54316  | 0.60537  |
| <i>SmFeCu-1-0.375-0.625</i> | -1.01226 | 1.09142  | 0.03958  | -1.41868 | 0.70316  | -0.35776 |
| <i>SmFeCu-1-0.5-0.5</i>     | -0.11235 | 2.84306  | 1.36535  | -0.39729 | 2.52329  | 1.063    |
| <i>SmFeCu-1-0.625-0.375</i> | -0.63816 | 2.5561   | 0.95897  | -1.0997  | 2.17081  | 0.53556  |
| <i>SmFeCu-1-0.75-0.25</i>   | 0.51345  | 2.41322  | 1.46334  | 0.31071  | 2.12958  | 1.22014  |
| <i>SmFeMg-1-0.125-0.875</i> | -1.82154 | 2.57415  | 0.37631  | -1.98436 | 2.2573   | 0.13647  |
| <i>SmFeMg-1-0.25-0.75</i>   | 0.74741  | 2.27357  | 1.51049  | 0.49491  | 1.90131  | 1.19811  |
| <i>SmFeMg-1-0.375-0.625</i> | -0.16815 | 2.93153  | 1.38169  | -0.47805 | 2.54727  | 1.03461  |
| <i>SmFeMg-1-0.625-0.375</i> | 0.45143  | 2.89151  | 1.67147  | 0.06118  | 2.54089  | 1.30103  |
| <i>SmFeMg-1-0.75-0.25</i>   | -1.22528 | 2.38528  | 0.58     | -1.59391 | 2.03764  | 0.22186  |
| <i>SmFeMg-1-0.875-0.125</i> | 0.60198  | 0.93933  | 0.77066  | 0.29945  | 0.56126  | 0.43035  |
| <i>SmFeMn-1-0.25-0.75</i>   | 0.72753  | 3.73468  | 2.2311   | 0.4346   | 3.37835  | 1.90647  |
| <i>SmFeMn-1-0.5-0.5</i>     | 0.45885  | 3.35295  | 1.9059   | 0.16527  | 2.9509   | 1.55808  |
| <i>SmFeMn-1-0.875-0.125</i> | 0.32224  | 3.88948  | 2.10586  | 0.17541  | 3.50896  | 1.84219  |
| <i>SmFeNi-1-0.125-0.875</i> | -0.54349 | 2.49587  | 0.97619  | -0.74421 | 2.1032   | 0.6795   |
| <i>SmFeNi-1-0.25-0.75</i>   | -1.17309 | 2.89214  | 0.85952  | -1.50757 | 2.61128  | 0.55185  |
| <i>SmFeNi-1-0.5-0.5</i>     | 0.51678  | 2.91231  | 1.71455  | 0.20882  | 2.56629  | 1.38756  |
| <i>SmFeNi-1-0.625-0.375</i> | -0.05412 | 3.73195  | 1.83892  | -0.28472 | 3.3604   | 1.53784  |
| <i>SmFeTi-1-0.5-0.5</i>     | 0.82513  | 5.09932  | 2.96222  | 0.65025  | 4.76251  | 2.70638  |
| <i>SmFeTi-1-0.625-0.375</i> | -0.00267 | 5.27104  | 2.63418  | -0.35529 | 4.97894  | 2.31183  |
| <i>SmMn-1-1</i>             | 0.55814  | -0.50204 | 0.02805  | 0.16759  | -1.07949 | -0.45595 |
| <i>SrBaCo-0.125-0.875-1</i> | -0.1003  | -0.41608 | -0.25819 | -0.1989  | -0.73148 | -0.46519 |
| <i>SrBaCo-0.25-0.75-1</i>   | -0.12413 | -0.2232  | -0.17367 | -0.45505 | -0.49761 | -0.47633 |
| <i>SrBaCo-0.375-0.625-1</i> | -0.39831 | -0.13037 | -0.26434 | -0.63708 | -0.46132 | -0.5492  |
| <i>SrBaCo-0.5-0.5-1</i>     | 0.30585  | -1.35363 | -0.52389 | 0.1094   | -1.63606 | -0.76333 |
| <i>SrBaCo-0.625-0.375-1</i> | 0.9479   | -1.05854 | -0.05532 | 0.87584  | -1.49521 | -0.30968 |
| <i>SrBaCo-0.75-0.25-1</i>   | -0.48529 | 0.25665  | -0.11432 | -0.71395 | -0.0287  | -0.37132 |
| <i>SrBaCo-0.875-0.125-1</i> | 0.37821  | -1.0925  | -0.35714 | 0.06789  | -1.23222 | -0.58217 |
| <i>SrBaCu-0.5-0.5-1</i>     | 0.10959  | -1.05899 | -0.4747  | -0.0507  | -1.48358 | -0.76714 |
| <i>SrBaCu-0.875-0.125-1</i> | -0.13305 | -0.33364 | -0.23334 | -0.45072 | -0.73668 | -0.5937  |
| <i>SrBaFe-0.125-0.875-1</i> | 0.53478  | 0.10298  | 0.31888  | 0.28772  | -0.17794 | 0.05489  |



|                                         |          |          |          |          |          |          |
|-----------------------------------------|----------|----------|----------|----------|----------|----------|
| <i>SrBaFe-0.25-0.75-1</i>               | 1.41167  | -0.02388 | 0.6939   | 1.09662  | -0.02324 | 0.53669  |
| <i>SrBaFe-0.375-0.625-1</i>             | 0.89413  | 0.66276  | 0.77845  | 0.63238  | 0.48078  | 0.55658  |
| <i>SrBaFe-0.5-0.5-1</i>                 | 1.5779   | -0.77074 | 0.40358  | 1.43202  | -1.17246 | 0.12978  |
| <i>SrBaFe-0.625-0.375-1</i>             | 0.78281  | 0.2889   | 0.53585  | 0.63005  | -0.16812 | 0.23097  |
| <i>SrBaFe-0.75-0.25-1</i>               | 0.87148  | 0.40176  | 0.63662  | 0.71614  | 0.07698  | 0.39656  |
| <i>SrBaFe-0.875-0.125-1</i>             | 1.7047   | -0.2016  | 0.75155  | 1.50207  | -0.52479 | 0.48864  |
| <i>SrBaFeCo-0.125-0.875-0.125-0.875</i> | 0.7776   | -0.98006 | -0.10123 | 0.60436  | -1.11749 | -0.25657 |
| <i>SrBaFeCo-0.125-0.875-0.25-0.75</i>   | -0.67043 | -0.06605 | -0.36824 | -0.97442 | -0.40882 | -0.69162 |
| <i>SrBaFeCo-0.125-0.875-0.375-0.625</i> | 0.14835  | 0.0959   | 0.12213  | -0.19153 | -0.17867 | -0.1851  |
| <i>SrBaFeCo-0.125-0.875-0.5-0.5</i>     | 0.57584  | -0.44782 | 0.06401  | 0.32108  | -0.73184 | -0.20538 |
| <i>SrBaFeCo-0.125-0.875-0.625-0.375</i> | -0.08018 | 0.04901  | -0.01559 | -0.27405 | -0.1872  | -0.23062 |
| <i>SrBaFeCo-0.125-0.875-0.75-0.25</i>   | 0.38539  | -0.36819 | 0.0086   | 0.25162  | -0.6478  | -0.19809 |
| <i>SrBaFeCo-0.125-0.875-0.875-0.125</i> | 1.20296  | -0.63207 | 0.28545  | 0.96827  | -0.9234  | 0.02243  |
| <i>SrBaFeCo-0.25-0.75-0.125-0.875</i>   | 0.75076  | -1.17945 | -0.21435 | 0.52797  | -1.39155 | -0.43179 |
| <i>SrBaFeCo-0.25-0.75-0.25-0.75</i>     | -0.80201 | 0.3204   | -0.24081 | -1.14343 | 0.07118  | -0.53612 |
| <i>SrBaFeCo-0.25-0.75-0.375-0.625</i>   | -0.04176 | 0.12975  | 0.044    | -0.35501 | -0.22139 | -0.2882  |
| <i>SrBaFeCo-0.25-0.75-0.5-0.5</i>       | 0.5385   | -0.52476 | 0.00687  | 0.40472  | -0.99008 | -0.29268 |
| <i>SrBaFeCo-0.25-0.75-0.625-0.375</i>   | 0.38635  | 0.32112  | 0.35373  | 0.23514  | 0.00333  | 0.11923  |
| <i>SrBaFeCo-0.25-0.75-0.75-0.25</i>     | 0.46329  | -0.07515 | 0.19407  | 0.59707  | -0.69678 | -0.04985 |
| <i>SrBaFeCo-0.25-0.75-0.875-0.125</i>   | 1.93722  | -0.80666 | 0.56528  | 1.68905  | -0.98616 | 0.35144  |
| <i>SrBaFeCo-0.375-0.625-0.125-0.875</i> | 0.26522  | -0.21736 | 0.02393  | 0.04973  | -0.49961 | -0.22494 |
| <i>SrBaFeCo-0.375-0.625-0.25-0.75</i>   | -0.21826 | -0.04108 | -0.12967 | -0.48035 | -0.24305 | -0.3617  |
| <i>SrBaFeCo-0.375-0.625-0.375-0.625</i> | -0.38446 | 0.40467  | 0.01011  | -0.5977  | 0.11022  | -0.24374 |
| <i>SrBaFeCo-0.375-0.625-0.5-0.5</i>     | 0.77275  | -0.40515 | 0.1838   | 0.62155  | -0.80055 | -0.0895  |
| <i>SrBaFeCo-0.375-0.625-0.625-0.375</i> | 0.43034  | -0.25831 | 0.08601  | 0.23342  | -0.65442 | -0.2105  |
| <i>SrBaFeCo-0.375-0.625-0.75-0.25</i>   | 0.84365  | -0.56854 | 0.13756  | 0.74666  | -1.08155 | -0.16744 |
| <i>SrBaFeCo-0.375-0.625-0.875-0.125</i> | 0.99255  | -0.55297 | 0.21979  | 0.80517  | -0.88045 | -0.03764 |
| <i>SrBaFeCo-0.5-0.5-0.125-0.875</i>     | 0.40183  | -0.37012 | 0.01586  | 0.17963  | -0.81631 | -0.31834 |
| <i>SrBaFeCo-0.5-0.5-0.25-0.75</i>       | -0.18825 | 0.55172  | 0.18174  | -0.38592 | 0.12444  | -0.13074 |
| <i>SrBaFeCo-0.5-0.5-0.375-0.625</i>     | 0.27915  | -0.15979 | 0.05968  | 0.11583  | -0.68077 | -0.28247 |
| <i>SrBaFeCo-0.5-0.5-0.5-0.5</i>         | 0.30449  | 0.59474  | 0.44961  | 0.09269  | 0.2085   | 0.15059  |
| <i>SrBaFeCo-0.5-0.5-0.625-0.375</i>     | -0.21343 | 0.08542  | -0.06401 | -0.3625  | -0.19963 | -0.28106 |
| <i>SrBaFeCo-0.5-0.5-0.75-0.25</i>       | 0.65015  | -0.42121 | 0.11447  | 0.53407  | -0.98597 | -0.22595 |
| <i>SrBaFeCo-0.5-0.5-0.875-0.125</i>     | 0.93909  | -0.55444 | 0.19233  | 0.69917  | -0.94793 | -0.12438 |
| <i>SrBaFeCo-0.625-0.375-0.125-0.875</i> | 0.59155  | -0.49895 | 0.0463   | 0.47222  | -0.65771 | -0.09275 |
| <i>SrBaFeCo-0.625-0.375-0.25-0.75</i>   | -0.00606 | -0.11649 | -0.06127 | -0.13067 | -0.62425 | -0.37746 |
| <i>SrBaFeCo-0.625-0.375-0.375-0.625</i> | 0.84934  | -0.51143 | 0.16896  | 0.70247  | -0.89432 | -0.09593 |
| <i>SrBaFeCo-0.625-0.375-0.5-0.5</i>     | 0.03721  | 0.13755  | 0.08738  | -0.18969 | -0.17432 | -0.182   |
| <i>SrBaFeCo-0.625-0.375-0.625-0.375</i> | 0.92261  | -0.62515 | 0.14873  | 0.66267  | -0.96817 | -0.15275 |
| <i>SrBaFeCo-0.625-0.375-0.75-0.25</i>   | 0.56399  | 0.00921  | 0.2866   | 0.38447  | -0.35161 | 0.01643  |
| <i>SrBaFeCo-0.625-0.375-0.875-0.125</i> | 0.82119  | -0.33687 | 0.24216  | 0.56621  | -0.4275  | 0.06936  |



|                                         |          |          |          |          |          |          |
|-----------------------------------------|----------|----------|----------|----------|----------|----------|
| <i>SrBaFeCo-0.75-0.25-0.125-0.875</i>   | 0.5044   | -0.68464 | -0.09012 | 0.28349  | -1.18304 | -0.44977 |
| <i>SrBaFeCo-0.75-0.25-0.25-0.75</i>     | -0.03652 | -0.07773 | -0.05713 | -0.25754 | -0.15251 | -0.20503 |
| <i>SrBaFeCo-0.75-0.25-0.375-0.625</i>   | -0.1028  | 0.49838  | 0.19779  | -0.38755 | -0.06225 | -0.2249  |
| <i>SrBaFeCo-0.75-0.25-0.5-0.5</i>       | 0.23642  | 0.27035  | 0.25339  | 0.02808  | -0.11008 | -0.041   |
| <i>SrBaFeCo-0.75-0.25-0.625-0.375</i>   | 0.19904  | 0.03144  | 0.11524  | 0.06667  | -0.44245 | -0.18789 |
| <i>SrBaFeCo-0.75-0.25-0.75-0.25</i>     | 0.28408  | 0.16514  | 0.22461  | 0.05287  | -0.16683 | -0.05698 |
| <i>SrBaFeCo-0.75-0.25-0.875-0.125</i>   | 0.88043  | 0.20039  | 0.54041  | 0.67325  | -0.09567 | 0.28879  |
| <i>SrBaFeCo-0.875-0.125-0.125-0.875</i> | 0.05552  | -0.2697  | -0.10709 | -0.18818 | -0.74663 | -0.4674  |
| <i>SrBaFeCo-0.875-0.125-0.25-0.75</i>   | -0.51485 | 0.83152  | 0.15833  | -0.74581 | 0.47565  | -0.13508 |
| <i>SrBaFeCo-0.875-0.125-0.375-0.625</i> | 0.16511  | 0.52432  | 0.34472  | -0.05709 | 0.26353  | 0.10322  |
| <i>SrBaFeCo-0.875-0.125-0.5-0.5</i>     | 0.05355  | 0.12663  | 0.09009  | -0.21381 | -0.00867 | -0.11124 |
| <i>SrBaFeCo-0.875-0.125-0.625-0.375</i> | 0.51992  | -0.10555 | 0.20719  | 0.31233  | -0.51212 | -0.09989 |
| <i>SrBaFeCo-0.875-0.125-0.75-0.25</i>   | 0.42035  | 0.13461  | 0.27748  | 0.22611  | -0.23859 | -0.00624 |
| <i>SrBaFeCo-0.875-0.125-0.875-0.125</i> | 1.65983  | -0.10752 | 0.77615  | 1.418    | -0.44013 | 0.48893  |
| <i>SrBaFeCu-0.125-0.875-0.375-0.625</i> | -0.74487 | -0.08609 | -0.41548 | -1.03698 | -0.32432 | -0.68065 |
| <i>SrBaFeCu-0.125-0.875-0.5-0.5</i>     | -0.20765 | -0.29038 | -0.24901 | -0.41339 | -0.66345 | -0.53842 |
| <i>SrBaFeCu-0.125-0.875-0.625-0.375</i> | -0.1427  | 0.08585  | -0.02843 | -0.38377 | -0.18004 | -0.2819  |
| <i>SrBaFeCu-0.125-0.875-0.75-0.25</i>   | -0.15843 | 0.13987  | -0.00928 | -0.45155 | -0.06072 | -0.25614 |
| <i>SrBaFeCu-0.125-0.875-0.875-0.125</i> | 1.1174   | -1.02973 | 0.04384  | 0.92554  | -1.36218 | -0.21832 |
| <i>SrBaFeCu-0.25-0.75-0.25-0.75</i>     | -0.1939  | -1.94566 | -1.06978 | -0.44597 | -2.28558 | -1.36577 |
| <i>SrBaFeCu-0.25-0.75-0.75-0.25</i>     | -0.59119 | -0.21222 | -0.40171 | -0.86756 | -0.54574 | -0.70665 |
| <i>SrBaFeCu-0.25-0.75-0.875-0.125</i>   | 0.6508   | -0.41657 | 0.11712  | 0.39338  | -0.78409 | -0.19536 |
| <i>SrBaFeCu-0.375-0.625-0.375-0.625</i> | -0.61129 | -0.17794 | -0.39462 | -0.85932 | -0.40572 | -0.63252 |
| <i>SrBaFeCu-0.375-0.625-0.625-0.375</i> | -0.12784 | -0.64334 | -0.38559 | -0.37257 | -0.88775 | -0.63016 |
| <i>SrBaFeCu-0.375-0.625-0.75-0.25</i>   | 0.59617  | -0.71593 | -0.05988 | 0.36286  | -0.98331 | -0.31022 |
| <i>SrBaFeCu-0.375-0.625-0.875-0.125</i> | 0.41489  | -0.78672 | -0.18591 | 0.13691  | -1.19423 | -0.52866 |
| <i>SrBaFeCu-0.5-0.5-0.125-0.875</i>     | 0.39573  | -1.20822 | -0.40625 | 0.44088  | -1.42877 | -0.49395 |
| <i>SrBaFeCu-0.5-0.5-0.375-0.625</i>     | -0.68783 | 0.16533  | -0.26125 | -1.02244 | -0.02635 | -0.5244  |
| <i>SrBaFeCu-0.5-0.5-0.625-0.375</i>     | 0.0641   | -0.7285  | -0.3322  | -0.08131 | -1.20546 | -0.64339 |
| <i>SrBaFeCu-0.5-0.5-0.75-0.25</i>       | 0.11351  | 0.19492  | 0.15422  | -0.17456 | -0.10925 | -0.1419  |
| <i>SrBaFeCu-0.5-0.5-0.875-0.125</i>     | 0.83249  | -0.45827 | 0.18711  | 0.6868   | -0.87578 | -0.09449 |
| <i>SrBaFeCu-0.625-0.375-0.125-0.875</i> | -0.21392 | -0.57404 | -0.39398 | -0.41027 | -0.85313 | -0.6317  |
| <i>SrBaFeCu-0.625-0.375-0.375-0.625</i> | -0.65362 | -0.10696 | -0.38029 | -0.80787 | -0.47909 | -0.64348 |
| <i>SrBaFeCu-0.625-0.375-0.5-0.5</i>     | -0.42527 | -0.23538 | -0.33033 | -0.63605 | -0.63718 | -0.63661 |
| <i>SrBaFeCu-0.625-0.375-0.625-0.375</i> | 0.2351   | -1.2205  | -0.4927  | -0.07235 | -1.56343 | -0.81789 |
| <i>SrBaFeCu-0.625-0.375-0.75-0.25</i>   | -0.24078 | 0.34807  | 0.05364  | -0.50345 | 0.02968  | -0.23689 |
| <i>SrBaFeCu-0.625-0.375-0.875-0.125</i> | 0.97081  | -0.44534 | 0.26274  | 0.70442  | -0.71734 | -0.00646 |
| <i>SrBaFeCu-0.75-0.25-0.125-0.875</i>   | -0.13507 | -1.32216 | -0.72862 | -0.32895 | -1.80873 | -1.06884 |
| <i>SrBaFeCu-0.75-0.25-0.375-0.625</i>   | -0.44031 | -0.13365 | -0.28698 | -0.64634 | -0.57742 | -0.61188 |
| <i>SrBaFeCu-0.75-0.25-0.5-0.5</i>       | -0.35661 | 0.09752  | -0.12955 | -0.60508 | -0.17111 | -0.38809 |

|                                         |          |          |          |          |          |          |
|-----------------------------------------|----------|----------|----------|----------|----------|----------|
| <i>SrBaFeCu-0.75-0.25-0.625-0.375</i>   | -0.39294 | 0.28938  | -0.05178 | -0.67161 | -0.0142  | -0.34291 |
| <i>SrBaFeCu-0.75-0.25-0.75-0.25</i>     | -0.22725 | 0.28805  | 0.0304   | -0.62759 | 0.02863  | -0.29948 |
| <i>SrBaFeCu-0.75-0.25-0.875-0.125</i>   | 0.92733  | -0.38384 | 0.27175  | 0.75922  | -0.83262 | -0.0367  |
| <i>SrBaFeCu-0.875-0.125-0.125-0.875</i> | 0.32668  | -1.22225 | -0.44779 | 0.26193  | -1.70496 | -0.72151 |
| <i>SrBaFeCu-0.875-0.125-0.375-0.625</i> | -0.20273 | -0.3196  | -0.26116 | -0.43215 | -0.70236 | -0.56725 |
| <i>SrBaFeCu-0.875-0.125-0.5-0.5</i>     | -0.30345 | -0.14601 | -0.22473 | -0.51302 | -0.58179 | -0.54741 |
| <i>SrBaFeCu-0.875-0.125-0.625-0.375</i> | -0.36254 | -0.03479 | -0.19867 | -0.60628 | -0.38398 | -0.49513 |
| <i>SrBaFeCu-0.875-0.125-0.75-0.25</i>   | -0.15969 | 0.26653  | 0.05342  | -0.53475 | 0.02589  | -0.25443 |
| <i>SrBaFeCu-0.875-0.125-0.875-0.125</i> | 0.90987  | -0.04206 | 0.4339   | 0.73137  | -0.44121 | 0.14508  |
| <i>SrBaFeMg-0.125-0.875-0.5-0.5</i>     | -0.16674 | -0.06492 | -0.11583 | -0.35519 | -0.3559  | -0.35554 |
| <i>SrBaFeMg-0.125-0.875-0.625-0.375</i> | -0.04287 | 0.61055  | 0.28384  | -0.32644 | 0.41395  | 0.04376  |
| <i>SrBaFeMg-0.125-0.875-0.75-0.25</i>   | -0.11463 | 0.0695   | -0.02256 | -0.29796 | -0.13236 | -0.21516 |
| <i>SrBaFeMg-0.125-0.875-0.875-0.125</i> | 0.72818  | -0.50278 | 0.1127   | 0.50055  | -0.81368 | -0.15657 |
| <i>SrBaFeMg-0.25-0.75-0.5-0.5</i>       | -0.12612 | 0.1265   | 0.000188 | -0.25803 | -0.08539 | -0.17171 |
| <i>SrBaFeMg-0.25-0.75-0.625-0.375</i>   | -0.12092 | -0.20841 | -0.16467 | -0.42828 | -0.44906 | -0.43867 |
| <i>SrBaFeMg-0.25-0.75-0.75-0.25</i>     | -0.17821 | -0.04913 | -0.11367 | -0.50212 | -0.34467 | -0.42339 |
| <i>SrBaFeMg-0.25-0.75-0.875-0.125</i>   | 0.64848  | -0.29072 | 0.17888  | 0.49145  | -0.4715  | 0.00998  |
| <i>SrBaFeMg-0.375-0.625-0.5-0.5</i>     | -0.01091 | 0.34401  | 0.16655  | -0.10427 | 0.11638  | 0.00606  |
| <i>SrBaFeMg-0.375-0.625-0.625-0.375</i> | -0.00067 | -0.309   | -0.15484 | -0.18135 | -0.5545  | -0.36792 |
| <i>SrBaFeMg-0.375-0.625-0.75-0.25</i>   | -0.29145 | -0.14127 | -0.21636 | -0.57384 | -0.3731  | -0.47347 |
| <i>SrBaFeMg-0.375-0.625-0.875-0.125</i> | 0.16771  | 0.07822  | 0.12296  | -0.05453 | -0.11482 | -0.08467 |
| <i>SrBaFeMg-0.5-0.5-0.5-0.5</i>         | -0.5696  | -0.2285  | -0.39905 | -0.7105  | -0.61169 | -0.66109 |
| <i>SrBaFeMg-0.5-0.5-0.625-0.375</i>     | 0.0445   | 0.82893  | 0.43671  | -0.23427 | 0.65111  | 0.20842  |
| <i>SrBaFeMg-0.5-0.5-0.75-0.25</i>       | -0.45157 | 0.79066  | 0.16954  | -0.65869 | 0.53241  | -0.06314 |
| <i>SrBaFeMg-0.5-0.5-0.875-0.125</i>     | 0.67569  | -0.14794 | 0.26387  | 0.4166   | -0.47402 | -0.02871 |
| <i>SrBaFeMg-0.625-0.375-0.5-0.5</i>     | -0.17077 | -0.40907 | -0.28992 | -0.29608 | -0.69287 | -0.49448 |
| <i>SrBaFeMg-0.625-0.375-0.625-0.375</i> | -0.06253 | -0.50076 | -0.28164 | -0.24803 | -0.90443 | -0.57623 |
| <i>SrBaFeMg-0.625-0.375-0.75-0.25</i>   | -0.16872 | 0.36386  | 0.09757  | -0.412   | 0.15497  | -0.12852 |
| <i>SrBaFeMg-0.625-0.375-0.875-0.125</i> | 0.67753  | -0.22618 | 0.22567  | 0.45216  | -0.5502  | -0.04902 |
| <i>SrBaFeMg-0.75-0.25-0.625-0.375</i>   | -0.16747 | 0.37825  | 0.10539  | -0.41077 | 0.02683  | -0.19197 |
| <i>SrBaFeMg-0.75-0.25-0.75-0.25</i>     | -0.09957 | 0.45867  | 0.17955  | -0.13136 | 0.19618  | 0.03241  |
| <i>SrBaFeMg-0.75-0.25-0.875-0.125</i>   | 0.73699  | -0.30312 | 0.21693  | 0.51625  | -0.60969 | -0.04672 |
| <i>SrBaFeMg-0.875-0.125-0.5-0.5</i>     | -0.13092 | -0.22696 | -0.17894 | -0.29215 | -0.45693 | -0.37454 |
| <i>SrBaFeMg-0.875-0.125-0.625-0.375</i> | -0.2324  | 0.55616  | 0.16188  | -0.51539 | 0.35182  | -0.08178 |
| <i>SrBaFeMg-0.875-0.125-0.75-0.25</i>   | 0.18231  | -0.06099 | 0.06066  | -0.10135 | -0.20737 | -0.15436 |
| <i>SrBaFeMg-0.875-0.125-0.875-0.125</i> | 0.75106  | -0.2015  | 0.27478  | 0.53729  | -0.56054 | -0.01162 |
| <i>SrBaFeMn-0.125-0.875-0.125-0.875</i> | -0.13508 | -0.51184 | -0.32346 | -0.39706 | -0.72536 | -0.56121 |
| <i>SrBaFeMn-0.125-0.875-0.25-0.75</i>   | -0.32417 | 0.07329  | -0.12544 | -0.62668 | -0.1668  | -0.39674 |
| <i>SrBaFeMn-0.125-0.875-0.375-0.625</i> | -0.18615 | 0.62918  | 0.22151  | -0.45385 | 0.35503  | -0.04941 |
| <i>SrBaFeMn-0.125-0.875-0.5-0.5</i>     | -0.18027 | 0.92306  | 0.37139  | -0.48301 | 0.65236  | 0.08468  |

|                                         |          |          |          |          |          |          |
|-----------------------------------------|----------|----------|----------|----------|----------|----------|
| <i>SrBaFeMn-0.125-0.875-0.625-0.375</i> | 0.10837  | 0.70977  | 0.40907  | -0.12862 | 0.45473  | 0.16306  |
| <i>SrBaFeMn-0.125-0.875-0.75-0.25</i>   | 0.21511  | 0.52965  | 0.37238  | -0.00363 | 0.24004  | 0.11821  |
| <i>SrBaFeMn-0.125-0.875-0.875-0.125</i> | 0.82138  | -0.11914 | 0.35112  | 0.53198  | -0.31309 | 0.10944  |
| <i>SrBaFeMn-0.25-0.75-0.25-0.75</i>     | 0.03905  | 0.52453  | 0.28179  | -0.24428 | 0.23718  | -0.00355 |
| <i>SrBaFeMn-0.25-0.75-0.375-0.625</i>   | -0.2015  | -0.55783 | -0.37966 | -0.50719 | -0.94981 | -0.7285  |
| <i>SrBaFeMn-0.25-0.75-0.5-0.5</i>       | 0.37246  | 0.3374   | 0.35493  | 0.18143  | 0.08588  | 0.13366  |
| <i>SrBaFeMn-0.25-0.75-0.625-0.375</i>   | 0.27547  | 1.14308  | 0.70928  | 0.07088  | 0.86613  | 0.46851  |
| <i>SrBaFeMn-0.25-0.75-0.75-0.25</i>     | 0.31294  | 1.20364  | 0.75829  | 0.18832  | 0.96618  | 0.57725  |
| <i>SrBaFeMn-0.25-0.75-0.875-0.125</i>   | 0.67372  | 0.04175  | 0.35773  | 0.41875  | -0.32372 | 0.04751  |
| <i>SrBaFeMn-0.375-0.625-0.125-0.875</i> | 0.20495  | -0.53908 | -0.16706 | -0.04472 | -0.74051 | -0.39262 |
| <i>SrBaFeMn-0.375-0.625-0.25-0.75</i>   | 0.01613  | 0.25094  | 0.13354  | -0.20936 | -0.06259 | -0.13598 |
| <i>SrBaFeMn-0.375-0.625-0.375-0.625</i> | -0.11745 | 0.60534  | 0.24394  | -0.44297 | 0.4551   | 0.00607  |
| <i>SrBaFeMn-0.375-0.625-0.5-0.5</i>     | -0.04559 | 0.77961  | 0.36701  | -0.32232 | 0.44635  | 0.06202  |
| <i>SrBaFeMn-0.375-0.625-0.625-0.375</i> | -0.06661 | -0.60278 | -0.33469 | -0.26134 | -0.87635 | -0.56884 |
| <i>SrBaFeMn-0.375-0.625-0.75-0.25</i>   | 0.20405  | 0.7609   | 0.48248  | -0.07532 | 0.48205  | 0.20336  |
| <i>SrBaFeMn-0.375-0.625-0.875-0.125</i> | 1.75756  | -0.64716 | 0.5552   | 1.55098  | -0.97497 | 0.288    |
| <i>SrBaFeMn-0.5-0.5-0.125-0.875</i>     | -0.23745 | 0.03296  | -0.10225 | -0.59108 | -0.28984 | -0.44046 |
| <i>SrBaFeMn-0.5-0.5-0.25-0.75</i>       | 0.10407  | -0.54036 | -0.21815 | -0.1584  | -0.92005 | -0.53923 |
| <i>SrBaFeMn-0.5-0.5-0.375-0.625</i>     | -0.28906 | 0.58306  | 0.147    | -0.60835 | 0.38361  | -0.11237 |
| <i>SrBaFeMn-0.5-0.5-0.5-0.5</i>         | 0.29197  | 0.01132  | 0.15164  | 0.09525  | -0.43581 | -0.17028 |
| <i>SrBaFeMn-0.5-0.5-0.625-0.375</i>     | -0.33396 | 1.42681  | 0.54642  | -0.61861 | 0.97884  | 0.18011  |
| <i>SrBaFeMn-0.5-0.5-0.75-0.25</i>       | 0.17028  | 0.2868   | 0.22854  | -0.07792 | 0.12363  | 0.02285  |
| <i>SrBaFeMn-0.5-0.5-0.875-0.125</i>     | 0.81618  | 0.10249  | 0.45933  | 0.53741  | -0.11557 | 0.21092  |
| <i>SrBaFeMn-0.625-0.375-0.125-0.875</i> | 0.10854  | 0.09657  | 0.10255  | -0.14681 | -0.24245 | -0.19463 |
| <i>SrBaFeMn-0.625-0.375-0.25-0.75</i>   | -0.0577  | 0.38435  | 0.16332  | -0.33918 | 0.13345  | -0.10286 |
| <i>SrBaFeMn-0.625-0.375-0.375-0.625</i> | 0.63953  | 0.42896  | 0.53425  | 0.44428  | 0.12914  | 0.28671  |
| <i>SrBaFeMn-0.625-0.375-0.5-0.5</i>     | 0.0704   | 0.24001  | 0.15521  | -0.20419 | 0.05717  | -0.07351 |
| <i>SrBaFeMn-0.625-0.375-0.625-0.375</i> | 0.21615  | 0.97696  | 0.59656  | -0.06872 | 0.65783  | 0.29455  |
| <i>SrBaFeMn-0.625-0.375-0.75-0.25</i>   | 0.19269  | 0.85822  | 0.52546  | 0.0023   | 0.59101  | 0.29666  |
| <i>SrBaFeMn-0.625-0.375-0.875-0.125</i> | 1.68493  | -1.05421 | 0.31536  | 1.49882  | -1.45354 | 0.02264  |
| <i>SrBaFeMn-0.75-0.25-0.125-0.875</i>   | 0.14542  | -0.18184 | -0.01821 | -0.03605 | -0.49016 | -0.26311 |
| <i>SrBaFeMn-0.75-0.25-0.25-0.75</i>     | 0.22292  | 0.58233  | 0.40263  | 0.01588  | 0.18357  | 0.09972  |
| <i>SrBaFeMn-0.75-0.25-0.375-0.625</i>   | 0.26596  | 0.90847  | 0.58721  | 0.1305   | 0.64981  | 0.39015  |
| <i>SrBaFeMn-0.75-0.25-0.5-0.5</i>       | 0.03773  | 1.35272  | 0.69522  | -0.21579 | 0.95184  | 0.36802  |
| <i>SrBaFeMn-0.75-0.25-0.625-0.375</i>   | 0.31351  | -0.03802 | 0.13774  | 0.13937  | -0.30948 | -0.08505 |
| <i>SrBaFeMn-0.75-0.25-0.75-0.25</i>     | 0.57074  | 0.49875  | 0.53474  | 0.405    | 0.22733  | 0.31616  |
| <i>SrBaFeMn-0.75-0.25-0.875-0.125</i>   | 1.14657  | -0.23184 | 0.45737  | 0.85726  | -0.46553 | 0.19586  |
| <i>SrBaFeMn-0.875-0.125-0.125-0.875</i> | 0.34797  | 0.17679  | 0.26238  | 0.08093  | -0.06899 | 0.00597  |
| <i>SrBaFeMn-0.875-0.125-0.25-0.75</i>   | 0.28261  | 0.05185  | 0.16723  | -0.00047 | -0.31562 | -0.15805 |
| <i>SrBaFeMn-0.875-0.125-0.375-0.625</i> | 0.17094  | 0.40018  | 0.28556  | -0.05548 | 0.15608  | 0.0503   |
| <i>SrBaFeMn-0.875-0.125-0.5-0.5</i>     | 0.0472   | 0.38986  | 0.21853  | -0.21607 | 0.16122  | -0.02743 |

|                                         |          |          |          |          |          |          |
|-----------------------------------------|----------|----------|----------|----------|----------|----------|
| <i>SrBaFeMn-0.875-0.125-0.625-0.375</i> | 0.26342  | 0.73228  | 0.49785  | -0.05494 | 0.53124  | 0.23815  |
| <i>SrBaFeMn-0.875-0.125-0.75-0.25</i>   | 0.11397  | 1.13447  | 0.62422  | -0.13065 | 0.82883  | 0.34909  |
| <i>SrBaFeMn-0.875-0.125-0.875-0.125</i> | 0.84616  | -0.00686 | 0.41965  | 0.42411  | -0.12015 | 0.15198  |
| <i>SrBaFeNi-0.125-0.875-0.375-0.625</i> | -0.48899 | 0.03612  | -0.22643 | -0.66819 | -0.22475 | -0.44647 |
| <i>SrBaFeNi-0.125-0.875-0.5-0.5</i>     | 0.33621  | -0.58416 | -0.12398 | 0.03189  | -0.73338 | -0.35074 |
| <i>SrBaFeNi-0.125-0.875-0.625-0.375</i> | 0.92232  | -0.79573 | 0.06329  | 0.80753  | -1.12436 | -0.15841 |
| <i>SrBaFeNi-0.125-0.875-0.75-0.25</i>   | -0.5368  | 0.01449  | -0.26116 | -0.83669 | -0.22952 | -0.5331  |
| <i>SrBaFeNi-0.125-0.875-0.875-0.125</i> | -0.0962  | 0.19215  | 0.04798  | -0.22659 | -0.0426  | -0.1346  |
| <i>SrBaFeNi-0.25-0.75-0.25-0.75</i>     | -0.70795 | -0.132   | -0.41997 | -0.87398 | -0.43967 | -0.65683 |
| <i>SrBaFeNi-0.25-0.75-0.375-0.625</i>   | -0.60571 | -0.171   | -0.38836 | -0.8409  | -0.45493 | -0.64791 |
| <i>SrBaFeNi-0.25-0.75-0.5-0.5</i>       | -0.1282  | -1.28389 | -0.70604 | -0.41075 | -1.68708 | -1.04892 |
| <i>SrBaFeNi-0.25-0.75-0.75-0.25</i>     | 0.02413  | -0.38213 | -0.179   | -0.26114 | -0.82535 | -0.54324 |
| <i>SrBaFeNi-0.25-0.75-0.875-0.125</i>   | 0.12535  | -0.19981 | -0.03723 | -0.09335 | -0.52427 | -0.30881 |
| <i>SrBaFeNi-0.375-0.625-0.25-0.75</i>   | -1.19441 | 0.39702  | -0.3987  | -1.43906 | 0.10513  | -0.66696 |
| <i>SrBaFeNi-0.375-0.625-0.375-0.625</i> | -0.73434 | -0.19883 | -0.46658 | -0.99373 | -0.48199 | -0.73786 |
| <i>SrBaFeNi-0.375-0.625-0.5-0.5</i>     | -0.28901 | 0.12436  | -0.08232 | -0.49421 | -0.08491 | -0.28956 |
| <i>SrBaFeNi-0.375-0.625-0.625-0.375</i> | 0.16963  | 0.35434  | 0.26199  | -0.09042 | 0.18209  | 0.04584  |
| <i>SrBaFeNi-0.375-0.625-0.75-0.25</i>   | -0.0186  | -0.29131 | -0.15495 | -0.35242 | -0.61223 | -0.48233 |
| <i>SrBaFeNi-0.375-0.625-0.875-0.125</i> | 0.07409  | -0.00332 | 0.03539  | -0.24833 | -0.11788 | -0.1831  |
| <i>SrBaFeNi-0.5-0.5-0.375-0.625</i>     | -0.52898 | -0.18674 | -0.35786 | -0.70626 | -0.45565 | -0.58095 |
| <i>SrBaFeNi-0.5-0.5-0.5-0.5</i>         | 0.00756  | -0.24051 | -0.11647 | -0.22012 | -0.5292  | -0.37466 |
| <i>SrBaFeNi-0.5-0.5-0.625-0.375</i>     | -0.26195 | 0.19672  | -0.03262 | -0.47906 | -0.0817  | -0.28038 |
| <i>SrBaFeNi-0.5-0.5-0.75-0.25</i>       | 0.08683  | 0.05129  | 0.06906  | -0.18171 | -0.2099  | -0.19581 |
| <i>SrBaFeNi-0.5-0.5-0.875-0.125</i>     | 0.78752  | -0.73752 | 0.025    | 0.53604  | -1.06841 | -0.26619 |
| <i>SrBaFeNi-0.625-0.375-0.5-0.5</i>     | -0.37759 | 0.16298  | -0.10731 | -0.61431 | -0.35606 | -0.48518 |
| <i>SrBaFeNi-0.625-0.375-0.625-0.375</i> | -0.01189 | -0.01274 | -0.01231 | -0.24284 | -0.35541 | -0.29913 |
| <i>SrBaFeNi-0.625-0.375-0.75-0.25</i>   | 0.53714  | -0.59769 | -0.03028 | 0.24541  | -0.91909 | -0.33684 |
| <i>SrBaFeNi-0.625-0.375-0.875-0.125</i> | 0.63451  | -0.75882 | -0.06215 | 0.43872  | -1.13288 | -0.34708 |
| <i>SrBaFeNi-0.75-0.25-0.375-0.625</i>   | -0.56162 | -0.1075  | -0.33456 | -0.82416 | -0.46695 | -0.64556 |
| <i>SrBaFeNi-0.75-0.25-0.625-0.375</i>   | -0.27508 | 0.51648  | 0.1207   | -0.51994 | 0.09657  | -0.21169 |
| <i>SrBaFeNi-0.75-0.25-0.75-0.25</i>     | -0.39487 | -0.20031 | -0.29759 | -0.72205 | -0.55435 | -0.6382  |
| <i>SrBaFeNi-0.75-0.25-0.875-0.125</i>   | 0.95053  | -0.71298 | 0.11877  | 0.7631   | -0.97464 | -0.10577 |
| <i>SrBaFeNi-0.875-0.125-0.125-0.875</i> | 0.03852  | -0.552   | -0.25674 | -0.19848 | -0.72401 | -0.46124 |
| <i>SrBaFeNi-0.875-0.125-0.25-0.75</i>   | -0.84094 | 0.17685  | -0.33205 | -1.05778 | -0.06972 | -0.56375 |
| <i>SrBaFeNi-0.875-0.125-0.5-0.5</i>     | -0.00817 | 0.22059  | 0.10621  | -0.26326 | -0.16348 | -0.21337 |
| <i>SrBaFeNi-0.875-0.125-0.625-0.375</i> | -0.32138 | 0.48105  | 0.07983  | -0.59472 | 0.16903  | -0.21284 |
| <i>SrBaFeNi-0.875-0.125-0.75-0.25</i>   | 0.28202  | 0.35396  | 0.31799  | 0.00711  | 0.1003   | 0.0537   |
| <i>SrBaFeNi-0.875-0.125-0.875-0.125</i> | 1.18185  | -0.94829 | 0.11678  | 0.93551  | -1.28036 | -0.17243 |
| <i>SrBaFeTi-0.125-0.875-0.125-0.875</i> | 5.96097  | 0.29595  | 3.12846  | 5.71721  | -0.18549 | 2.76586  |
| <i>SrBaFeTi-0.125-0.875-0.625-</i>      | 0.23341  | 1.47929  | 0.85635  | 0.0458   | 1.37342  | 0.70961  |

|                                         |          |          |          |          |          |          |
|-----------------------------------------|----------|----------|----------|----------|----------|----------|
| 0.375                                   |          |          |          |          |          |          |
| <i>SrBaFeTi-0.125-0.875-0.75-0.25</i>   | 0.68257  | 1.41999  | 1.05128  | 0.41243  | 1.2688   | 0.84062  |
| <i>SrBaFeTi-0.125-0.875-0.875-0.125</i> | 1.62994  | -1.4807  | 0.07462  | 1.41802  | -1.82095 | -0.20147 |
| <i>SrBaFeTi-0.25-0.75-0.25-0.75</i>     | 6.64963  | 0.48104  | 3.56534  | 6.36897  | 0.0355   | 3.20223  |
| <i>SrBaFeTi-0.25-0.75-0.375-0.625</i>   | 3.95821  | 0.90335  | 2.43078  | 3.85756  | 0.63068  | 2.24412  |
| <i>SrBaFeTi-0.25-0.75-0.5-0.5</i>       | 0.57978  | 2.25219  | 1.41599  | 0.20026  | 1.92526  | 1.06276  |
| <i>SrBaFeTi-0.25-0.75-0.75-0.25</i>     | 0.58915  | 1.13668  | 0.86291  | 0.47457  | 0.67565  | 0.57511  |
| <i>SrBaFeTi-0.25-0.75-0.875-0.125</i>   | 0.74783  | 0.0829   | 0.41536  | 0.5792   | -0.33411 | 0.12255  |
| <i>SrBaFeTi-0.375-0.625-0.5-0.5</i>     | 0.65664  | 1.53955  | 1.0981   | 0.30619  | 1.20373  | 0.75496  |
| <i>SrBaFeTi-0.375-0.625-0.625-0.375</i> | 1.54054  | 0.22048  | 0.88051  | 1.24103  | -0.02749 | 0.60677  |
| <i>SrBaFeTi-0.375-0.625-0.75-0.25</i>   | 0.82446  | 1.13771  | 0.98109  | 0.56877  | 0.74246  | 0.65562  |
| <i>SrBaFeTi-0.375-0.625-0.875-0.125</i> | 1.21048  | -0.3297  | 0.44039  | 1.02487  | -0.71167 | 0.1566   |
| <i>SrBaFeTi-0.5-0.5-0.5-0.5</i>         | 0.46705  | 2.04205  | 1.25455  | 0.03904  | 1.75168  | 0.89536  |
| <i>SrBaFeTi-0.5-0.5-0.75-0.25</i>       | 0.55988  | 2.24101  | 1.40045  | 0.25897  | 2.08973  | 1.17435  |
| <i>SrBaFeTi-0.5-0.5-0.875-0.125</i>     | 1.22468  | 0.22863  | 0.72665  | 1.04998  | -0.21693 | 0.41653  |
| <i>SrBaFeTi-0.625-0.375-0.625-0.375</i> | 0.18709  | 1.68493  | 0.93601  | -0.09584 | 1.45798  | 0.68107  |
| <i>SrBaFeTi-0.625-0.375-0.75-0.25</i>   | 0.98306  | 0.38726  | 0.68516  | 0.76574  | -0.0031  | 0.38132  |
| <i>SrBaFeTi-0.625-0.375-0.875-0.125</i> | 1.37562  | -0.47214 | 0.45174  | 1.39055  | -1.1131  | 0.13873  |
| <i>SrBaFeTi-0.75-0.25-0.625-0.375</i>   | 0.43852  | 2.37824  | 1.40838  | 0.30896  | 1.95288  | 1.13092  |
| <i>SrBaFeTi-0.75-0.25-0.75-0.25</i>     | 0.85927  | 1.19927  | 1.02927  | 0.6294   | 0.88021  | 0.7548   |
| <i>SrBaFeTi-0.75-0.25-0.875-0.125</i>   | 1.24868  | 0.05526  | 0.65197  | 1.09912  | -0.28877 | 0.40517  |
| <i>SrBaFeTi-0.875-0.125-0.625-0.375</i> | 0.63304  | 1.01135  | 0.82219  | 0.50959  | 0.49788  | 0.50373  |
| <i>SrBaFeTi-0.875-0.125-0.875-0.125</i> | 1.59561  | 0.04398  | 0.81979  | 1.46773  | -0.26749 | 0.60012  |
| <i>SrBaMn-0.125-0.875-1</i>             | 0.11324  | -0.17203 | -0.02939 | -0.19593 | -0.39921 | -0.29757 |
| <i>SrBaMn-0.25-0.75-1</i>               | -0.33966 | -0.24861 | -0.29413 | -0.54173 | -0.61816 | -0.57994 |
| <i>SrBaMn-0.375-0.625-1</i>             | 0.74604  | -0.96063 | -0.10729 | 0.4988   | -1.26681 | -0.384   |
| <i>SrBaMn-0.5-0.5-1</i>                 | -0.22794 | -0.18113 | -0.20454 | -0.46376 | -0.55973 | -0.51174 |
| <i>SrBaMn-0.625-0.375-1</i>             | 0.39874  | -0.5706  | -0.08593 | 0.17313  | -0.99452 | -0.4107  |
| <i>SrBaMn-0.75-0.25-1</i>               | 0.02283  | -0.20903 | -0.0931  | -0.13518 | -0.52027 | -0.32773 |
| <i>SrBaMn-0.875-0.125-1</i>             | 0.27381  | -0.25907 | 0.00737  | 0.00171  | -0.6813  | -0.3398  |
| <i>SrCaCo-0.125-0.875-1</i>             | 0.97755  | -0.34493 | 0.31631  | 0.61589  | -0.66461 | -0.02436 |
| <i>SrCaCo-0.25-0.75-1</i>               | 0.48188  | -0.07047 | 0.2057   | 0.27927  | -0.54724 | -0.13398 |
| <i>SrCaCo-0.375-0.625-1</i>             | -0.18382 | 0.69806  | 0.25712  | -0.49637 | 0.38662  | -0.05488 |
| <i>SrCaCo-0.625-0.375-1</i>             | 1.02548  | 0.17413  | 0.5998   | 0.85199  | -0.19423 | 0.32888  |
| <i>SrCaCo-0.75-0.25-1</i>               | 0.19103  | 0.40577  | 0.2984   | -0.00066 | -0.00444 | -0.00255 |
| <i>SrCaCo-0.875-0.125-1</i>             | 0.0039   | -0.74308 | -0.36959 | -0.20316 | -0.99153 | -0.59734 |
| <i>SrCaCu-0.125-0.875-1</i>             | 0.88963  | -0.69524 | 0.09719  | 0.65241  | -0.96679 | -0.15719 |
| <i>SrCaCu-0.25-0.75-1</i>               | -0.0014  | 0.87701  | 0.43781  | -0.21396 | 0.38202  | 0.08403  |
| <i>SrCaCu-0.375-0.625-1</i>             | 0.86503  | -0.50502 | 0.18     | 0.56093  | -1.08455 | -0.26181 |
| <i>SrCaCu-0.5-0.5-1</i>                 | 1.16837  | -0.80424 | 0.18206  | 0.90915  | -1.2897  | -0.19028 |
| <i>SrCaCu-0.625-0.375-1</i>             | 0.71766  | -0.58585 | 0.06591  | 0.44846  | -1.07428 | -0.31291 |
| <i>SrCaCu-0.75-0.25-1</i>               | -0.01464 | -0.46413 | -0.23939 | -0.45179 | -0.92912 | -0.69046 |
| <i>SrCaCu-0.875-0.125-1</i>             | 0.16397  | -0.61148 | -0.22376 | -0.14376 | -0.9469  | -0.54533 |
| <i>SrCaFe-0.125-0.875-1</i>             | 2.27822  | -1.05375 | 0.61223  | 1.90217  | -1.17606 | 0.36305  |



|                                         |          |          |          |          |          |          |
|-----------------------------------------|----------|----------|----------|----------|----------|----------|
| <i>SrCaFe-0.25-0.75-1</i>               | 1.2905   | 0.23679  | 0.76365  | 1.0477   | 0.07133  | 0.55951  |
| <i>SrCaFe-0.375-0.625-1</i>             | 1.33764  | 0.30227  | 0.81996  | 1.08473  | 0.1665   | 0.62561  |
| <i>SrCaFe-0.5-0.5-1</i>                 | 0.04278  | 1.11119  | 0.57698  | -0.11562 | 0.79795  | 0.34116  |
| <i>SrCaFe-0.625-0.375-1</i>             | 0.42987  | 0.67972  | 0.55479  | 0.13729  | 0.42025  | 0.27877  |
| <i>SrCaFe-0.75-0.25-1</i>               | 0.95441  | 0.2758   | 0.6151   | 0.76691  | 0.18818  | 0.47754  |
| <i>SrCaFe-0.875-0.125-1</i>             | 0.57668  | 0.57066  | 0.57367  | 0.33086  | 0.34956  | 0.34021  |
| <i>SrCaFeCo-0.125-0.875-0.125-0.875</i> | 0.65675  | 0.17391  | 0.41533  | 0.41387  | -0.23723 | 0.08832  |
| <i>SrCaFeCo-0.125-0.875-0.25-0.75</i>   | 0.05621  | 0.5843   | 0.32026  | -0.22208 | 0.35893  | 0.06842  |
| <i>SrCaFeCo-0.125-0.875-0.375-0.625</i> | 0.26226  | 0.02136  | 0.14181  | 0.06737  | -0.31448 | -0.12355 |
| <i>SrCaFeCo-0.125-0.875-0.5-0.5</i>     | 0.03847  | -0.5333  | -0.24741 | -0.29265 | -0.78645 | -0.53955 |
| <i>SrCaFeCo-0.125-0.875-0.625-0.375</i> | 0.10027  | 0.70372  | 0.402    | -0.23801 | 0.47402  | 0.118    |
| <i>SrCaFeCo-0.125-0.875-0.75-0.25</i>   | 0.36617  | 0.64731  | 0.50674  | 0.10609  | 0.48135  | 0.29372  |
| <i>SrCaFeCo-0.125-0.875-0.875-0.125</i> | 1.58837  | -1.12095 | 0.23371  | 1.32277  | -1.42101 | -0.04912 |
| <i>SrCaFeCo-0.25-0.75-0.125-0.875</i>   | 0.18615  | -0.06832 | 0.05892  | 0.08624  | -0.4921  | -0.20293 |
| <i>SrCaFeCo-0.25-0.75-0.25-0.75</i>     | -0.73125 | 0.90626  | 0.08751  | -0.84772 | 0.51478  | -0.16647 |
| <i>SrCaFeCo-0.25-0.75-0.375-0.625</i>   | -0.59346 | 1.00707  | 0.2068   | -0.76538 | 0.78561  | 0.01012  |
| <i>SrCaFeCo-0.25-0.75-0.5-0.5</i>       | 0.0266   | -0.58164 | -0.27752 | -0.08925 | -0.79058 | -0.43992 |
| <i>SrCaFeCo-0.25-0.75-0.625-0.375</i>   | -0.36372 | 0.79883  | 0.21756  | -0.47306 | 0.51925  | 0.02309  |
| <i>SrCaFeCo-0.25-0.75-0.75-0.25</i>     | 0.01953  | 0.68139  | 0.35046  | -0.08879 | 0.48637  | 0.19879  |
| <i>SrCaFeCo-0.25-0.75-0.875-0.125</i>   | 1.077    | -0.82137 | 0.12782  | 0.93715  | -0.96419 | -0.01352 |
| <i>SrCaFeCo-0.375-0.625-0.125-0.875</i> | 0.07644  | 0.60242  | 0.33943  | -0.16904 | 0.2367   | 0.03383  |
| <i>SrCaFeCo-0.375-0.625-0.25-0.75</i>   | -0.46757 | 0.94056  | 0.2365   | -0.76964 | 0.60392  | -0.08286 |
| <i>SrCaFeCo-0.375-0.625-0.375-0.625</i> | 0.04267  | 0.73513  | 0.3889   | -0.30939 | 0.49713  | 0.09387  |
| <i>SrCaFeCo-0.375-0.625-0.5-0.5</i>     | -0.06702 | 0.20896  | 0.07097  | -0.41077 | -0.11245 | -0.26161 |
| <i>SrCaFeCo-0.375-0.625-0.625-0.375</i> | 1.14951  | 0.09963  | 0.62457  | 0.8971   | -0.15555 | 0.37077  |
| <i>SrCaFeCo-0.375-0.625-0.75-0.25</i>   | -0.39714 | 1.17855  | 0.3907   | -0.6723  | 0.94114  | 0.13442  |
| <i>SrCaFeCo-0.375-0.625-0.875-0.125</i> | 1.23058  | -0.8269  | 0.20184  | 0.9626   | -1.03325 | -0.03533 |
| <i>SrCaFeCo-0.5-0.5-0.125-0.875</i>     | 0.23116  | -0.02382 | 0.10367  | -0.07472 | -0.43363 | -0.25417 |
| <i>SrCaFeCo-0.5-0.5-0.25-0.75</i>       | -0.57133 | -0.16884 | -0.37008 | -0.83685 | -0.41972 | -0.62829 |
| <i>SrCaFeCo-0.5-0.5-0.375-0.625</i>     | 0.49389  | 0.01412  | 0.25401  | 0.24227  | -0.31067 | -0.0342  |
| <i>SrCaFeCo-0.5-0.5-0.5-0.5</i>         | -0.01081 | 0.85294  | 0.42106  | -0.27163 | 0.50674  | 0.11756  |
| <i>SrCaFeCo-0.5-0.5-0.625-0.375</i>     | 0.35537  | 0.72046  | 0.53792  | 0.1154   | 0.41967  | 0.26754  |
| <i>SrCaFeCo-0.5-0.5-0.75-0.25</i>       | 0.22864  | 0.75746  | 0.49305  | -0.03744 | 0.66458  | 0.31357  |
| <i>SrCaFeCo-0.5-0.5-0.875-0.125</i>     | 0.892    | 0.19184  | 0.54192  | 0.67173  | -0.14408 | 0.26383  |
| <i>SrCaFeCo-0.625-0.375-0.125-0.875</i> | 0.43862  | -0.28518 | 0.07672  | 0.13892  | -0.58874 | -0.22491 |
| <i>SrCaFeCo-0.625-0.375-0.25-0.75</i>   | -0.09793 | 0.2301   | 0.06608  | -0.31636 | -0.27402 | -0.29519 |
| <i>SrCaFeCo-0.625-0.375-0.375-0.625</i> | 0.45509  | -0.2165  | 0.1193   | 0.15909  | -0.51442 | -0.17766 |
| <i>SrCaFeCo-0.625-0.375-0.5-0.5</i>     | -0.52273 | 1.23693  | 0.3571   | -0.76749 | 0.80154  | 0.01702  |
| <i>SrCaFeCo-0.625-0.375-0.625-0.375</i> | -0.11134 | 0.84926  | 0.36896  | -0.33711 | 0.61445  | 0.13867  |
| <i>SrCaFeCo-0.625-0.375-0.75-0.25</i>   | 0.56823  | 0.41351  | 0.49087  | 0.3065   | 0.21367  | 0.26009  |
| <i>SrCaFeCo-0.625-0.375-0.875-0.125</i> | 1.5661   | 0.08662  | 0.82636  | 1.34364  | -0.19547 | 0.57409  |

|                                         |          |          |          |          |          |          |
|-----------------------------------------|----------|----------|----------|----------|----------|----------|
| <i>SrCaFeCo-0.75-0.25-0.125-0.875</i>   | 0.30251  | -0.54086 | -0.11918 | 0.13503  | -0.96847 | -0.41672 |
| <i>SrCaFeCo-0.75-0.25-0.25-0.75</i>     | -0.44171 | 0.26161  | -0.09005 | -0.72145 | 0.08761  | -0.31692 |
| <i>SrCaFeCo-0.75-0.25-0.375-0.625</i>   | 0.06354  | 0.51569  | 0.28961  | -0.03607 | 0.03434  | -0.00087 |
| <i>SrCaFeCo-0.75-0.25-0.5-0.5</i>       | 0.09002  | 0.36471  | 0.22736  | -0.06313 | 0.07222  | 0.00455  |
| <i>SrCaFeCo-0.75-0.25-0.625-0.375</i>   | -0.03637 | 0.65934  | 0.31149  | -0.22039 | 0.32244  | 0.05102  |
| <i>SrCaFeCo-0.75-0.25-0.75-0.25</i>     | 0.5155   | 0.63919  | 0.57734  | 0.3205   | 0.22799  | 0.27425  |
| <i>SrCaFeCo-0.75-0.25-0.875-0.125</i>   | 0.79862  | 0.47783  | 0.63822  | 0.61508  | 0.30101  | 0.45804  |
| <i>SrCaFeCo-0.875-0.125-0.125-0.875</i> | -0.09019 | -0.10953 | -0.09986 | -0.31763 | -0.68704 | -0.50233 |
| <i>SrCaFeCo-0.875-0.125-0.375-0.625</i> | 0.14885  | 0.42105  | 0.28495  | -0.01168 | 0.11173  | 0.05002  |
| <i>SrCaFeCo-0.875-0.125-0.5-0.5</i>     | 0.22013  | -0.47944 | -0.12966 | -0.03388 | -0.69037 | -0.36212 |
| <i>SrCaFeCo-0.875-0.125-0.625-0.375</i> | 0.2067   | 0.44884  | 0.32777  | -0.09003 | 0.07789  | -0.00607 |
| <i>SrCaFeCo-0.875-0.125-0.75-0.25</i>   | 0.29804  | 0.5948   | 0.44642  | 0.01324  | 0.29377  | 0.15351  |
| <i>SrCaFeCo-0.875-0.125-0.875-0.125</i> | 1.58609  | -1.30096 | 0.14257  | 1.40547  | -1.67676 | -0.13565 |
| <i>SrCaFeCu-0.125-0.875-0.125-0.875</i> | 0.34064  | -0.28856 | 0.02604  | 0.03286  | -0.62059 | -0.29387 |
| <i>SrCaFeCu-0.125-0.875-0.25-0.75</i>   | -0.19594 | -0.32931 | -0.26262 | -0.50982 | -0.5602  | -0.53501 |
| <i>SrCaFeCu-0.125-0.875-0.375-0.625</i> | -0.74113 | 0.15959  | -0.29077 | -1.02072 | -0.1422  | -0.58146 |
| <i>SrCaFeCu-0.125-0.875-0.5-0.5</i>     | 0.18084  | -0.34624 | -0.0827  | -0.16731 | -0.59192 | -0.37962 |
| <i>SrCaFeCu-0.125-0.875-0.625-0.375</i> | 0.46975  | -1.27948 | -0.40487 | 0.22745  | -1.60429 | -0.68842 |
| <i>SrCaFeCu-0.125-0.875-0.75-0.25</i>   | -0.24517 | 0.51155  | 0.13319  | -0.52977 | 0.27538  | -0.12719 |
| <i>SrCaFeCu-0.125-0.875-0.875-0.125</i> | 1.02707  | 0.47301  | 0.75004  | 0.68748  | 0.30082  | 0.49415  |
| <i>SrCaFeCu-0.25-0.75-0.25-0.75</i>     | -0.20622 | -0.33839 | -0.27231 | -0.3787  | -0.70336 | -0.54103 |
| <i>SrCaFeCu-0.25-0.75-0.375-0.625</i>   | -0.58498 | 0.07553  | -0.25472 | -0.92313 | -0.24855 | -0.58584 |
| <i>SrCaFeCu-0.25-0.75-0.5-0.5</i>       | -0.36499 | -0.14298 | -0.25398 | -0.62379 | -0.33464 | -0.47921 |
| <i>SrCaFeCu-0.25-0.75-0.625-0.375</i>   | -0.15105 | -0.87191 | -0.51148 | -0.29562 | -1.15136 | -0.72349 |
| <i>SrCaFeCu-0.25-0.75-0.75-0.25</i>     | -0.07083 | 0.83371  | 0.38144  | -0.23334 | 0.6166   | 0.19163  |
| <i>SrCaFeCu-0.25-0.75-0.875-0.125</i>   | 1.07925  | 0.13513  | 0.60719  | 0.9025   | 0.04943  | 0.47596  |
| <i>SrCaFeCu-0.375-0.625-0.125-0.875</i> | 0.03302  | -0.47452 | -0.22075 | -0.25551 | -0.96697 | -0.61124 |
| <i>SrCaFeCu-0.375-0.625-0.25-0.75</i>   | 0.12026  | 0.04617  | 0.08321  | -0.22191 | -0.34382 | -0.28286 |
| <i>SrCaFeCu-0.375-0.625-0.375-0.625</i> | -0.36338 | 0.08475  | -0.13931 | -0.55771 | -0.23913 | -0.39842 |
| <i>SrCaFeCu-0.375-0.625-0.5-0.5</i>     | -0.24609 | -0.1524  | -0.19925 | -0.67674 | -0.43674 | -0.55674 |
| <i>SrCaFeCu-0.375-0.625-0.625-0.375</i> | -0.26275 | 0.23442  | -0.01417 | -0.46759 | -0.07939 | -0.27349 |
| <i>SrCaFeCu-0.375-0.625-0.75-0.25</i>   | -0.48101 | 0.52227  | 0.02063  | -0.83948 | 0.33419  | -0.25265 |
| <i>SrCaFeCu-0.375-0.625-0.875-0.125</i> | 0.65514  | 0.15195  | 0.40355  | 0.3732   | -0.16972 | 0.10174  |
| <i>SrCaFeCu-0.5-0.5-0.125-0.875</i>     | 0.38926  | -1.16686 | -0.3888  | 0.16172  | -1.72663 | -0.78246 |
| <i>SrCaFeCu-0.5-0.5-0.25-0.75</i>       | -0.21541 | -0.55469 | -0.38505 | -0.58878 | -0.82829 | -0.70853 |
| <i>SrCaFeCu-0.5-0.5-0.375-0.625</i>     | -0.72494 | 0.43438  | -0.14528 | -1.00576 | 0.11381  | -0.44598 |
| <i>SrCaFeCu-0.5-0.5-0.5-0.5</i>         | -0.52018 | -0.09204 | -0.30611 | -0.93103 | -0.46555 | -0.69829 |
| <i>SrCaFeCu-0.5-0.5-0.625-0.375</i>     | -0.11895 | -0.53734 | -0.32815 | -0.31935 | -0.80836 | -0.56385 |
| <i>SrCaFeCu-0.5-0.5-0.75-0.25</i>       | 0.1229   | 0.2283   | 0.1756   | -0.16621 | -0.0796  | -0.1229  |
| <i>SrCaFeCu-0.5-0.5-0.875-0.125</i>     | 0.8379   | 0.46637  | 0.65214  | 0.54413  | 0.2766   | 0.41037  |
| <i>SrCaFeCu-0.625-0.375-0.125-</i>      | -0.19772 | -0.4081  | -0.30291 | -0.40323 | -0.65545 | -0.52934 |



|                                         |          |          |          |          |          |          |
|-----------------------------------------|----------|----------|----------|----------|----------|----------|
| 0.875                                   |          |          |          |          |          |          |
| <i>SrCaFeCu-0.625-0.375-0.25-0.75</i>   | -0.21736 | -0.21909 | -0.21823 | -0.45545 | -0.56639 | -0.51092 |
| <i>SrCaFeCu-0.625-0.375-0.375-0.625</i> | -0.44861 | 0.02727  | -0.21067 | -0.68807 | -0.35337 | -0.52072 |
| <i>SrCaFeCu-0.625-0.375-0.5-0.5</i>     | -0.18584 | -0.09907 | -0.14245 | -0.4498  | -0.58602 | -0.51791 |
| <i>SrCaFeCu-0.625-0.375-0.75-0.25</i>   | 0.10208  | 0.26519  | 0.18363  | -0.21872 | 0.00503  | -0.10685 |
| <i>SrCaFeCu-0.625-0.375-0.875-0.125</i> | 0.70016  | 0.39251  | 0.54634  | 0.41883  | 0.12182  | 0.27033  |
| <i>SrCaFeCu-0.75-0.25-0.125-0.875</i>   | -0.01816 | -0.88619 | -0.45217 | -0.11637 | -1.3593  | -0.73784 |
| <i>SrCaFeCu-0.75-0.25-0.25-0.75</i>     | -0.13771 | -0.40883 | -0.27327 | -0.33448 | -0.88258 | -0.60853 |
| <i>SrCaFeCu-0.75-0.25-0.375-0.625</i>   | -0.18352 | -0.13499 | -0.15925 | -0.42183 | -0.50113 | -0.46148 |
| <i>SrCaFeCu-0.75-0.25-0.5-0.5</i>       | -0.56555 | 0.37691  | -0.09432 | -0.81457 | 0.09516  | -0.35971 |
| <i>SrCaFeCu-0.75-0.25-0.625-0.375</i>   | -0.24376 | 0.05988  | -0.09194 | -0.52788 | -0.14512 | -0.3365  |
| <i>SrCaFeCu-0.75-0.25-0.75-0.25</i>     | 0.02314  | 0.11396  | 0.06855  | -0.19166 | -0.28992 | -0.24079 |
| <i>SrCaFeCu-0.75-0.25-0.875-0.125</i>   | 0.73564  | 0.57468  | 0.65516  | 0.57986  | 0.35112  | 0.46549  |
| <i>SrCaFeCu-0.875-0.125-0.125-0.875</i> | -0.1657  | -0.2743  | -0.22    | -0.31081 | -0.5975  | -0.45416 |
| <i>SrCaFeCu-0.875-0.125-0.25-0.75</i>   | -0.35526 | -0.06912 | -0.21219 | -0.62984 | -0.41363 | -0.52173 |
| <i>SrCaFeCu-0.875-0.125-0.375-0.625</i> | -0.38075 | 0.0081   | -0.18633 | -0.58306 | -0.42862 | -0.50584 |
| <i>SrCaFeCu-0.875-0.125-0.5-0.5</i>     | -0.19454 | -0.17601 | -0.18528 | -0.41403 | -0.54601 | -0.48002 |
| <i>SrCaFeCu-0.875-0.125-0.625-0.375</i> | -0.06909 | -0.3667  | -0.21789 | -0.34038 | -0.88711 | -0.61374 |
| <i>SrCaFeCu-0.875-0.125-0.75-0.25</i>   | 0.19573  | 0.63068  | 0.41321  | -0.04841 | 0.37652  | 0.16406  |
| <i>SrCaFeCu-0.875-0.125-0.875-0.125</i> | 0.81043  | 0.13761  | 0.47402  | 0.57222  | -0.0896  | 0.24131  |
| <i>SrCaFeMg-0.125-0.875-0.5-0.5</i>     | -0.91307 | 0.29908  | -0.30699 | -1.12048 | 0.04316  | -0.53866 |
| <i>SrCaFeMg-0.125-0.875-0.625-0.375</i> | -0.40002 | 0.04702  | -0.1765  | -0.60282 | -0.15424 | -0.37853 |
| <i>SrCaFeMg-0.125-0.875-0.75-0.25</i>   | -0.2465  | -0.02841 | -0.13746 | -0.47055 | -0.31403 | -0.39229 |
| <i>SrCaFeMg-0.125-0.875-0.875-0.125</i> | 0.34851  | 0.61895  | 0.48373  | 0.13317  | 0.43354  | 0.28336  |
| <i>SrCaFeMg-0.25-0.75-0.5-0.5</i>       | 0.09964  | -1.28191 | -0.59114 | -0.00339 | -1.53006 | -0.76673 |
| <i>SrCaFeMg-0.25-0.75-0.625-0.375</i>   | 0.0601   | 0.63987  | 0.34999  | -0.06333 | 0.53056  | 0.23361  |
| <i>SrCaFeMg-0.25-0.75-0.75-0.25</i>     | 0.01253  | 1.08432  | 0.54843  | -0.13321 | 1.039    | 0.4529   |
| <i>SrCaFeMg-0.25-0.75-0.875-0.125</i>   | -0.26539 | 1.17126  | 0.45293  | -0.41233 | 1.01011  | 0.29889  |
| <i>SrCaFeMg-0.375-0.625-0.5-0.5</i>     | -0.33411 | 0.03431  | -0.1499  | -0.50284 | -0.17608 | -0.33946 |
| <i>SrCaFeMg-0.375-0.625-0.625-0.375</i> | -0.08797 | -0.74247 | -0.41522 | -0.31044 | -1.05202 | -0.68123 |
| <i>SrCaFeMg-0.375-0.625-0.75-0.25</i>   | -0.67372 | 0.79851  | 0.06239  | -0.93788 | 0.54868  | -0.1946  |
| <i>SrCaFeMg-0.375-0.625-0.875-0.125</i> | 0.08192  | 0.44763  | 0.26478  | -0.16645 | 0.07125  | -0.0476  |
| <i>SrCaFeMg-0.5-0.5-0.5-0.5</i>         | 0.06517  | 0.07929  | 0.07223  | -0.11204 | -0.2723  | -0.19217 |
| <i>SrCaFeMg-0.5-0.5-0.625-0.375</i>     | -0.12816 | -0.49282 | -0.31049 | -0.4236  | -0.63119 | -0.52739 |
| <i>SrCaFeMg-0.5-0.5-0.75-0.25</i>       | -0.07935 | -0.38777 | -0.23356 | -0.26412 | -0.64662 | -0.45537 |
| <i>SrCaFeMg-0.5-0.5-0.875-0.125</i>     | 0.79083  | 0.06311  | 0.42697  | 0.60435  | -0.19846 | 0.20294  |
| <i>SrCaFeMg-0.625-0.375-0.5-0.5</i>     | -0.41141 | -0.11596 | -0.26368 | -0.58464 | -0.34345 | -0.46404 |
| <i>SrCaFeMg-0.625-0.375-0.625-0.375</i> | 0.09699  | -0.01334 | 0.04183  | -0.07193 | -0.25636 | -0.16415 |
| <i>SrCaFeMg-0.625-0.375-0.75-0.25</i>   | -0.35912 | 0.31585  | -0.02163 | -0.55128 | 0.0264   | -0.26244 |
| <i>SrCaFeMg-0.625-0.375-0.875-0.125</i> | 0.30938  | 0.34544  | 0.32741  | 0.08771  | 0.07317  | 0.08044  |
| <i>SrCaFeMg-0.75-0.25-0.5-0.5</i>       | -0.60494 | -0.1562  | -0.38057 | -0.79077 | -0.34219 | -0.56648 |

|                                         |          |          |          |          |          |          |
|-----------------------------------------|----------|----------|----------|----------|----------|----------|
| <i>SrCaFeMg-0.75-0.25-0.625-0.375</i>   | -0.01666 | -0.19211 | -0.10439 | -0.1938  | -0.39505 | -0.29442 |
| <i>SrCaFeMg-0.75-0.25-0.75-0.25</i>     | 0.11767  | -0.11996 | -0.00115 | -0.01103 | -0.38625 | -0.19864 |
| <i>SrCaFeMg-0.75-0.25-0.875-0.125</i>   | 0.63201  | -0.0643  | 0.28385  | 0.3929   | -0.26253 | 0.06518  |
| <i>SrCaFeMg-0.875-0.125-0.5-0.5</i>     | -0.44036 | -0.24871 | -0.34453 | -0.63289 | -0.51729 | -0.57509 |
| <i>SrCaFeMg-0.875-0.125-0.625-0.375</i> | 0.14483  | 0.28894  | 0.21689  | -0.07514 | 0.03269  | -0.02122 |
| <i>SrCaFeMg-0.875-0.125-0.75-0.25</i>   | -0.18855 | 0.52897  | 0.17021  | -0.42318 | 0.31527  | -0.05396 |
| <i>SrCaFeMg-0.875-0.125-0.875-0.125</i> | 0.78553  | -0.19311 | 0.29621  | 0.54409  | -0.47846 | 0.03281  |
| <i>SrCaFeMn-0.125-0.875-0.125-0.875</i> | 0.56359  | 0.98878  | 0.77619  | 0.2509   | 0.69916  | 0.47503  |
| <i>SrCaFeMn-0.125-0.875-0.25-0.75</i>   | 0.93104  | 0.88157  | 0.9063   | 0.64901  | 0.50422  | 0.57662  |
| <i>SrCaFeMn-0.125-0.875-0.375-0.625</i> | 1.29108  | -0.34569 | 0.4727   | 0.94607  | -0.54869 | 0.19869  |
| <i>SrCaFeMn-0.125-0.875-0.5-0.5</i>     | 0.56339  | 0.95848  | 0.76094  | 0.29257  | 0.75314  | 0.52286  |
| <i>SrCaFeMn-0.125-0.875-0.625-0.375</i> | 0.4264   | 0.95391  | 0.69016  | 0.13126  | 0.68501  | 0.40813  |
| <i>SrCaFeMn-0.125-0.875-0.75-0.25</i>   | 0.32841  | 1.55239  | 0.9404   | 0.03151  | 1.36719  | 0.69935  |
| <i>SrCaFeMn-0.125-0.875-0.875-0.125</i> | 1.75049  | 0.43946  | 1.09497  | 1.50127  | 0.25373  | 0.8775   |
| <i>SrCaFeMn-0.25-0.75-0.125-0.875</i>   | 0.34939  | 0.76284  | 0.55611  | 0.25599  | 0.47671  | 0.36635  |
| <i>SrCaFeMn-0.25-0.75-0.25-0.75</i>     | -0.13423 | 0.49085  | 0.17831  | -0.33755 | 0.22144  | -0.05806 |
| <i>SrCaFeMn-0.25-0.75-0.375-0.625</i>   | -0.04999 | 0.65225  | 0.30113  | -0.21941 | 0.48446  | 0.13253  |
| <i>SrCaFeMn-0.25-0.75-0.5-0.5</i>       | -0.15906 | 1.64885  | 0.74489  | -0.35218 | 1.43086  | 0.53934  |
| <i>SrCaFeMn-0.25-0.75-0.625-0.375</i>   | 0.37433  | 1.58701  | 0.98067  | 0.17503  | 1.2248   | 0.69992  |
| <i>SrCaFeMn-0.25-0.75-0.75-0.25</i>     | -0.0041  | 0.90953  | 0.45272  | -0.10118 | 0.71173  | 0.30528  |
| <i>SrCaFeMn-0.25-0.75-0.875-0.125</i>   | -0.2873  | 1.70546  | 0.70908  | -0.43263 | 1.37723  | 0.4723   |
| <i>SrCaFeMn-0.375-0.625-0.125-0.875</i> | 0.4108   | -0.04808 | 0.18136  | 0.14031  | -0.36059 | -0.11014 |
| <i>SrCaFeMn-0.375-0.625-0.25-0.75</i>   | 0.43484  | 0.96317  | 0.69901  | 0.16547  | 0.70669  | 0.43608  |
| <i>SrCaFeMn-0.375-0.625-0.375-0.625</i> | 0.688    | 0.0578   | 0.3729   | 0.43978  | -0.1681  | 0.13584  |
| <i>SrCaFeMn-0.375-0.625-0.5-0.5</i>     | 0.89556  | 0.89251  | 0.89403  | 0.56772  | 0.59203  | 0.57987  |
| <i>SrCaFeMn-0.375-0.625-0.625-0.375</i> | 0.37453  | 0.23396  | 0.30424  | 0.05294  | -0.05668 | -0.00187 |
| <i>SrCaFeMn-0.375-0.625-0.75-0.25</i>   | 0.71014  | 0.61688  | 0.66351  | 0.46407  | 0.44937  | 0.45672  |
| <i>SrCaFeMn-0.375-0.625-0.875-0.125</i> | 0.07332  | 1.97811  | 1.02572  | -0.10484 | 1.79186  | 0.84351  |
| <i>SrCaFeMn-0.5-0.5-0.125-0.875</i>     | -0.16411 | 0.07369  | -0.04521 | -0.42342 | -0.18227 | -0.30285 |
| <i>SrCaFeMn-0.5-0.5-0.25-0.75</i>       | 0.44794  | 0.99497  | 0.72146  | 0.11592  | 0.67269  | 0.39431  |
| <i>SrCaFeMn-0.5-0.5-0.375-0.625</i>     | 0.69962  | 0.88052  | 0.79007  | 0.42089  | 0.49368  | 0.45729  |
| <i>SrCaFeMn-0.5-0.5-0.5-0.5</i>         | 0.37949  | 1.27134  | 0.82541  | 0.10163  | 1.0558   | 0.57872  |
| <i>SrCaFeMn-0.5-0.5-0.625-0.375</i>     | 0.38667  | 0.83822  | 0.61244  | 0.05889  | 0.62054  | 0.33972  |
| <i>SrCaFeMn-0.5-0.5-0.75-0.25</i>       | 0.30284  | 1.92136  | 1.1121   | 0.07035  | 1.64608  | 0.85821  |
| <i>SrCaFeMn-0.5-0.5-0.875-0.125</i>     | 1.19471  | -0.27518 | 0.45977  | 0.96951  | -0.48428 | 0.24262  |
| <i>SrCaFeMn-0.625-0.375-0.125-0.875</i> | 0.38844  | -0.35666 | 0.01589  | 0.11664  | -0.79549 | -0.33942 |
| <i>SrCaFeMn-0.625-0.375-0.25-0.75</i>   | 0.40468  | 0.24711  | 0.3259   | 0.04259  | -0.15028 | -0.05384 |
| <i>SrCaFeMn-0.625-0.375-0.375-0.625</i> | 0.12371  | 0.72779  | 0.42575  | -0.12294 | 0.51246  | 0.19476  |
| <i>SrCaFeMn-0.625-0.375-0.5-0.5</i>     | 0.16668  | 1.3895   | 0.77809  | -0.12856 | 1.06166  | 0.46655  |
| <i>SrCaFeMn-0.625-0.375-0.625-0.375</i> | 0.88018  | 0.55589  | 0.71803  | 0.62194  | 0.28887  | 0.4554   |

|                                         |          |          |          |          |          |          |
|-----------------------------------------|----------|----------|----------|----------|----------|----------|
| <i>SrCaFeMn-0.625-0.375-0.75-0.25</i>   | 0.10572  | 0.5147   | 0.31021  | -0.10615 | 0.08098  | -0.01258 |
| <i>SrCaFeMn-0.625-0.375-0.875-0.125</i> | 1.118    | 0.48947  | 0.80374  | 0.81655  | 0.24319  | 0.52987  |
| <i>SrCaFeMn-0.75-0.25-0.125-0.875</i>   | 0.14248  | 0.08122  | 0.11185  | -0.02111 | -0.39795 | -0.20953 |
| <i>SrCaFeMn-0.75-0.25-0.25-0.75</i>     | 0.00385  | 0.34819  | 0.17602  | -0.21444 | 0.02792  | -0.09326 |
| <i>SrCaFeMn-0.75-0.25-0.375-0.625</i>   | -0.008   | 1.02643  | 0.50921  | -0.20392 | 0.57024  | 0.18316  |
| <i>SrCaFeMn-0.75-0.25-0.5-0.5</i>       | 0.27377  | 0.05699  | 0.16538  | 0.1103   | -0.29531 | -0.0925  |
| <i>SrCaFeMn-0.75-0.25-0.625-0.375</i>   | -0.06294 | 1.28472  | 0.61089  | -0.22014 | 1.05802  | 0.41894  |
| <i>SrCaFeMn-0.75-0.25-0.75-0.25</i>     | 0.53013  | 0.3619   | 0.44602  | 0.42755  | 0.02462  | 0.22609  |
| <i>SrCaFeMn-0.75-0.25-0.875-0.125</i>   | 1.18966  | 0.73112  | 0.96039  | 0.90318  | 0.68108  | 0.79213  |
| <i>SrCaFeMn-0.875-0.125-0.125-0.875</i> | 0.5114   | -0.15686 | 0.17727  | 0.20288  | -0.59782 | -0.19747 |
| <i>SrCaFeMn-0.875-0.125-0.25-0.75</i>   | 0.35706  | 0.52131  | 0.43919  | 0.03505  | 0.27756  | 0.15631  |
| <i>SrCaFeMn-0.875-0.125-0.375-0.625</i> | 0.2352   | 0.56394  | 0.39957  | -0.01947 | 0.34458  | 0.16255  |
| <i>SrCaFeMn-0.875-0.125-0.5-0.5</i>     | 0.30908  | 0.79464  | 0.55186  | -0.0038  | 0.55741  | 0.2768   |
| <i>SrCaFeMn-0.875-0.125-0.625-0.375</i> | 0.37153  | 1.06158  | 0.71655  | 0.14321  | 0.81001  | 0.47661  |
| <i>SrCaFeMn-0.875-0.125-0.75-0.25</i>   | 0.37277  | 0.8591   | 0.61593  | 0.16777  | 0.46348  | 0.31562  |
| <i>SrCaFeMn-0.875-0.125-0.875-0.125</i> | 1.02955  | 0.72617  | 0.87786  | 0.6709   | 0.60401  | 0.63745  |
| <i>SrCaFeNi-0.125-0.875-0.125-0.875</i> | 0.16243  | -0.44947 | -0.14352 | 0.00848  | -0.71725 | -0.35438 |
| <i>SrCaFeNi-0.125-0.875-0.25-0.75</i>   | 0.06578  | 0.18893  | 0.12736  | -0.05503 | -0.21339 | -0.13421 |
| <i>SrCaFeNi-0.125-0.875-0.375-0.625</i> | -0.22695 | -0.13624 | -0.1816  | -0.44225 | -0.43148 | -0.43686 |
| <i>SrCaFeNi-0.125-0.875-0.625-0.375</i> | -0.06388 | 0.16126  | 0.04869  | -0.29112 | -0.14902 | -0.22007 |
| <i>SrCaFeNi-0.125-0.875-0.75-0.25</i>   | -0.10141 | 0.69757  | 0.29808  | -0.41484 | 0.45055  | 0.01786  |
| <i>SrCaFeNi-0.125-0.875-0.875-0.125</i> | 1.05739  | -0.34585 | 0.35577  | 0.78493  | -0.56962 | 0.10765  |
| <i>SrCaFeNi-0.25-0.75-0.125-0.875</i>   | -0.50539 | -0.07714 | -0.29126 | -0.69571 | -0.38463 | -0.54017 |
| <i>SrCaFeNi-0.25-0.75-0.25-0.75</i>     | -0.71396 | -0.21088 | -0.46242 | -0.86431 | -0.63787 | -0.75109 |
| <i>SrCaFeNi-0.25-0.75-0.375-0.625</i>   | -0.60084 | -0.22946 | -0.41515 | -0.74198 | -0.47399 | -0.60798 |
| <i>SrCaFeNi-0.25-0.75-0.5-0.5</i>       | -0.68845 | 0.17245  | -0.258   | -0.87377 | -0.15745 | -0.51561 |
| <i>SrCaFeNi-0.25-0.75-0.625-0.375</i>   | -0.20192 | -0.10845 | -0.15519 | -0.31329 | -0.44177 | -0.37753 |
| <i>SrCaFeNi-0.25-0.75-0.75-0.25</i>     | -0.01217 | 0.10001  | 0.04392  | -0.10069 | -0.15425 | -0.12747 |
| <i>SrCaFeNi-0.25-0.75-0.875-0.125</i>   | 0.57795  | -0.37975 | 0.0991   | 0.31358  | -0.4966  | -0.09151 |
| <i>SrCaFeNi-0.375-0.625-0.25-0.75</i>   | -0.54706 | 0.37857  | -0.08424 | -0.77537 | 0.14044  | -0.31747 |
| <i>SrCaFeNi-0.375-0.625-0.375-0.625</i> | -0.43409 | 0.20692  | -0.11358 | -0.7132  | -0.10399 | -0.40859 |
| <i>SrCaFeNi-0.375-0.625-0.5-0.5</i>     | -0.28194 | 0.20633  | -0.0378  | -0.55964 | -0.03321 | -0.29642 |
| <i>SrCaFeNi-0.375-0.625-0.75-0.25</i>   | -0.09312 | 1.37789  | 0.64238  | -0.38132 | 1.21035  | 0.41451  |
| <i>SrCaFeNi-0.375-0.625-0.875-0.125</i> | 0.68818  | 0.36908  | 0.52863  | 0.40445  | 0.17327  | 0.28886  |
| <i>SrCaFeNi-0.5-0.5-0.125-0.875</i>     | -0.30792 | -0.17664 | -0.24228 | -0.605   | -0.57688 | -0.59094 |
| <i>SrCaFeNi-0.5-0.5-0.25-0.75</i>       | -0.41229 | 0.04259  | -0.18485 | -0.64655 | -0.30613 | -0.47634 |
| <i>SrCaFeNi-0.5-0.5-0.375-0.625</i>     | -0.39274 | 0.31071  | -0.04101 | -0.61487 | 0.04918  | -0.28285 |
| <i>SrCaFeNi-0.5-0.5-0.5-0.5</i>         | -0.11721 | -0.12575 | -0.12148 | -0.3563  | -0.52477 | -0.44054 |
| <i>SrCaFeNi-0.5-0.5-0.625-0.375</i>     | -0.36372 | -0.24039 | -0.30206 | -0.66483 | -0.58086 | -0.62284 |
| <i>SrCaFeNi-0.5-0.5-0.75-0.25</i>       | 0.00298  | 0.78984  | 0.39641  | -0.24279 | 0.52885  | 0.14303  |
| <i>SrCaFeNi-0.5-0.5-0.875-0.125</i>     | 0.95398  | -0.60235 | 0.17581  | 0.68406  | -0.86599 | -0.09097 |
| <i>SrCaFeNi-0.625-0.375-0.125-</i>      | -0.02605 | -0.42805 | -0.22705 | -0.22537 | -0.69279 | -0.45908 |

|                                         |          |          |          |          |          |          |
|-----------------------------------------|----------|----------|----------|----------|----------|----------|
| 0.875                                   |          |          |          |          |          |          |
| <i>SrCaFeNi-0.625-0.375-0.25-0.75</i>   | 4.92974  | -0.00352 | 2.46311  | 4.26286  | -0.30197 | 1.98045  |
| <i>SrCaFeNi-0.625-0.375-0.5-0.5</i>     | -0.38017 | 0.28444  | -0.04787 | -0.6051  | -0.07564 | -0.34037 |
| <i>SrCaFeNi-0.625-0.375-0.625-0.375</i> | 0.11689  | 0.2378   | 0.17734  | -0.04446 | -0.19482 | -0.11964 |
| <i>SrCaFeNi-0.625-0.375-0.75-0.25</i>   | -0.24908 | 1.12291  | 0.43691  | -0.51705 | 0.8705   | 0.17673  |
| <i>SrCaFeNi-0.625-0.375-0.875-0.125</i> | 0.86969  | -0.63072 | 0.11949  | 0.58128  | -0.97393 | -0.19633 |
| <i>SrCaFeNi-0.75-0.25-0.125-0.875</i>   | 0.11278  | -0.86136 | -0.37429 | -0.00977 | -1.22613 | -0.61795 |
| <i>SrCaFeNi-0.75-0.25-0.25-0.75</i>     | -0.64381 | 0.16195  | -0.24093 | -0.87784 | -0.10671 | -0.49227 |
| <i>SrCaFeNi-0.75-0.25-0.375-0.625</i>   | -0.47365 | -0.21503 | -0.34434 | -0.66056 | -0.49912 | -0.57984 |
| <i>SrCaFeNi-0.75-0.25-0.5-0.5</i>       | -0.54043 | -0.1788  | -0.35962 | -0.77519 | -0.5856  | -0.68039 |
| <i>SrCaFeNi-0.75-0.25-0.625-0.375</i>   | 0.12444  | -0.14961 | -0.01258 | -0.12408 | -0.61668 | -0.37038 |
| <i>SrCaFeNi-0.75-0.25-0.75-0.25</i>     | -0.08364 | 0.13865  | 0.0275   | -0.26646 | -0.1957  | -0.23108 |
| <i>SrCaFeNi-0.75-0.25-0.875-0.125</i>   | 0.94458  | -0.58188 | 0.18135  | 0.86127  | -0.97775 | -0.05824 |
| <i>SrCaFeNi-0.875-0.125-0.25-0.75</i>   | -0.49678 | -0.06729 | -0.28203 | -0.80781 | -0.39012 | -0.59897 |
| <i>SrCaFeNi-0.875-0.125-0.5-0.5</i>     | -0.34189 | -0.0546  | -0.19824 | -0.6156  | -0.31604 | -0.46582 |
| <i>SrCaFeNi-0.875-0.125-0.625-0.375</i> | 0.36671  | -0.06302 | 0.15184  | 0.14564  | -0.33561 | -0.09499 |
| <i>SrCaFeNi-0.875-0.125-0.75-0.25</i>   | 0.0921   | 0.65786  | 0.37498  | -0.20231 | 0.39227  | 0.09498  |
| <i>SrCaFeNi-0.875-0.125-0.875-0.125</i> | 1.5287   | -0.35224 | 0.58823  | 1.3452   | -0.53435 | 0.40543  |
| <i>SrCaFeTi-0.125-0.875-0.875-0.125</i> | 2.12183  | 0.48288  | 1.30236  | 2.06526  | 0.13246  | 1.09886  |
| <i>SrCaFeTi-0.25-0.75-0.625-0.375</i>   | 0.41434  | 2.80448  | 1.60941  | 0.25804  | 2.60207  | 1.43005  |
| <i>SrCaFeTi-0.25-0.75-0.75-0.25</i>     | 0.60216  | 1.50281  | 1.05248  | 0.41312  | 1.12724  | 0.77018  |
| <i>SrCaFeTi-0.25-0.75-0.875-0.125</i>   | 0.08563  | 0.77361  | 0.42962  | -0.024   | 0.46485  | 0.22043  |
| <i>SrCaFeTi-0.375-0.625-0.625-0.375</i> | 0.24117  | 1.45623  | 0.8487   | -0.08581 | 1.22469  | 0.56944  |
| <i>SrCaFeTi-0.375-0.625-0.875-0.125</i> | 0.50179  | 0.96379  | 0.73279  | 0.27054  | 0.6738   | 0.47217  |
| <i>SrCaFeTi-0.5-0.5-0.875-0.125</i>     | 1.06319  | 0.35738  | 0.71029  | 0.87739  | 0.0598   | 0.46859  |
| <i>SrCaFeTi-0.625-0.375-0.625-0.375</i> | 0.30485  | 2.53366  | 1.41925  | 0.09303  | 1.96362  | 1.02832  |
| <i>SrCaFeTi-0.625-0.375-0.75-0.25</i>   | 1.47962  | 0.46695  | 0.97329  | 1.26077  | -0.06715 | 0.59681  |
| <i>SrCaFeTi-0.625-0.375-0.875-0.125</i> | 0.33664  | 1.72663  | 1.03163  | 0.14424  | 1.34754  | 0.74589  |
| <i>SrCaFeTi-0.75-0.25-0.625-0.375</i>   | 1.22324  | 0.62276  | 0.923    | 1.19177  | 0.17886  | 0.68531  |
| <i>SrCaFeTi-0.75-0.25-0.75-0.25</i>     | 0.61411  | 0.9239   | 0.769    | 0.45143  | 0.50892  | 0.48018  |
| <i>SrCaFeTi-0.75-0.25-0.875-0.125</i>   | 0.60865  | 1.11996  | 0.8643   | 0.43752  | 0.65035  | 0.54393  |
| <i>SrCaFeTi-0.875-0.125-0.75-0.25</i>   | 1.45878  | 0.62097  | 1.03988  | 1.25866  | 0.17728  | 0.71797  |
| <i>SrCaFeTi-0.875-0.125-0.875-0.125</i> | 1.3809   | 0.43963  | 0.91027  | 1.24905  | -0.01905 | 0.615    |
| <i>SrCaMn-0.125-0.875-1</i>             | 1.7539   | -0.30802 | 0.72294  | 1.4215   | -0.63706 | 0.39222  |
| <i>SrCaMn-0.25-0.75-1</i>               | -0.8498  | 1.00874  | 0.07947  | -1.19022 | 0.79502  | -0.1976  |
| <i>SrCaMn-0.375-0.625-1</i>             | 0.63647  | 0.34147  | 0.48897  | 0.28838  | 0.00463  | 0.14651  |
| <i>SrCaMn-0.5-0.5-1</i>                 | 0.24631  | 0.17118  | 0.20874  | -0.04433 | -0.1354  | -0.08987 |
| <i>SrCaMn-0.625-0.375-1</i>             | -0.09327 | 0.27301  | 0.08987  | -0.37541 | -0.04508 | -0.21024 |
| <i>SrCaMn-0.75-0.25-1</i>               | -0.5239  | 0.42492  | -0.04949 | -0.76481 | 0.16807  | -0.29837 |
| <i>SrCaMn-0.875-0.125-1</i>             | 0.26709  | 0.12885  | 0.19797  | -0.11171 | -0.16091 | -0.13631 |
| <i>SrCo-1-1</i>                         | 0.52748  | -0.48559 | 0.02095  | 0.42338  | -0.71516 | -0.14589 |
| <i>SrFe-1-1</i>                         | 0.60345  | -0.31055 | 0.14645  | 0.37154  | -0.33673 | 0.0174   |

|                                        |          |          |          |          |          |          |
|----------------------------------------|----------|----------|----------|----------|----------|----------|
| <i>SrFeCo-1-0.125-0.875</i>            | 0.12061  | -0.5555  | -0.21745 | -0.07882 | -1.10659 | -0.59271 |
| <i>SrFeCo-1-0.25-0.75</i>              | -0.07413 | -0.31644 | -0.19528 | -0.24794 | -0.46699 | -0.35747 |
| <i>SrFeCo-1-0.375-0.625</i>            | 0.12955  | 0.41986  | 0.27471  | -0.11361 | 0.15769  | 0.02204  |
| <i>SrFeCo-1-0.5-0.5</i>                | 0.68455  | 0.32824  | 0.5064   | 0.57879  | 0.062    | 0.3204   |
| <i>SrFeCo-1-0.625-0.375</i>            | 0.19303  | 0.41837  | 0.3057   | 0.07862  | 0.114    | 0.09631  |
| <i>SrFeCo-1-0.75-0.25</i>              | 0.34204  | 0.68288  | 0.51246  | 0.00546  | 0.60549  | 0.30548  |
| <i>SrFeCo-1-0.875-0.125</i>            | 1.88326  | -0.76648 | 0.55839  | 1.72365  | -1.06938 | 0.32713  |
| <i>SrFeCu-1-0.125-0.875</i>            | -1.01619 | 0.15067  | -0.43276 | -1.59909 | 0.10311  | -0.74799 |
| <i>SrFeCu-1-0.375-0.625</i>            | -0.357   | -0.17907 | -0.26803 | -0.6257  | -0.53362 | -0.57966 |
| <i>SrFeCu-1-0.5-0.5</i>                | -0.3662  | -0.1594  | -0.2628  | -0.61643 | -0.56763 | -0.59203 |
| <i>SrFeCu-1-0.75-0.25</i>              | 0.30731  | 0.41729  | 0.3623   | 0.07264  | 0.10923  | 0.09093  |
| <i>SrFeCu-1-0.875-0.125</i>            | 0.91712  | -0.0445  | 0.43631  | 0.7238   | -0.3376  | 0.1931   |
| <i>SrFeMg-1-0.5-0.5</i>                | -0.27778 | 0.19258  | -0.0426  | -0.50768 | -0.06577 | -0.28673 |
| <i>SrFeMg-1-0.625-0.375</i>            | -0.26904 | 0.20085  | -0.0341  | -0.53937 | -0.01545 | -0.27741 |
| <i>SrFeMg-1-0.75-0.25</i>              | 0.27248  | -0.08948 | 0.0915   | 0.09156  | -0.43133 | -0.16988 |
| <i>SrFeMg-1-0.875-0.125</i>            | 0.73468  | 0.04844  | 0.39156  | 0.46347  | -0.06758 | 0.19795  |
| <i>SrFeMn-1-0.125-0.875</i>            | 0.22514  | 0.08094  | 0.15304  | -0.00366 | -0.26955 | -0.13661 |
| <i>SrFeMn-1-0.25-0.75</i>              | 0.13157  | 0.28482  | 0.2082   | -0.16554 | 0.03328  | -0.06613 |
| <i>SrFeMn-1-0.375-0.625</i>            | 0.00106  | 0.05198  | 0.02652  | -0.20494 | -0.21165 | -0.20829 |
| <i>SrFeMn-1-0.5-0.5</i>                | 0.52152  | 0.21742  | 0.36947  | 0.29186  | -0.02942 | 0.13122  |
| <i>SrFeMn-1-0.625-0.375</i>            | 0.51378  | 0.15933  | 0.33655  | 0.35306  | -0.04384 | 0.15461  |
| <i>SrFeMn-1-0.75-0.25</i>              | 0.45693  | 0.91919  | 0.68806  | 0.35371  | 0.5819   | 0.46781  |
| <i>SrFeMn-1-0.875-0.125</i>            | 1.00216  | 0.84928  | 0.92572  | 0.67664  | 0.79453  | 0.73558  |
| <i>SrFeNi-1-0.125-0.875</i>            | 0.18441  | -0.58188 | -0.19874 | -0.01024 | -1.01907 | -0.51465 |
| <i>SrFeNi-1-0.25-0.75</i>              | -0.55276 | 0.14039  | -0.20619 | -0.74499 | -0.15009 | -0.44754 |
| <i>SrFeNi-1-0.375-0.625</i>            | -0.67581 | 0.11113  | -0.28234 | -1.04885 | -0.08564 | -0.56724 |
| <i>SrFeNi-1-0.5-0.5</i>                | 0.09269  | -0.28413 | -0.09572 | -0.1538  | -0.6149  | -0.38435 |
| <i>SrFeNi-1-0.625-0.375</i>            | -0.17107 | 1.23639  | 0.53266  | -0.39495 | 0.95233  | 0.27869  |
| <i>SrFeNi-1-0.75-0.25</i>              | 0.22232  | 0.84554  | 0.53393  | 0.02987  | 0.64085  | 0.33536  |
| <i>SrFeNi-1-0.875-0.125</i>            | 0.75756  | 0.06369  | 0.41063  | 0.54821  | -0.24006 | 0.15408  |
| <i>SrFeTi-1-0.5-0.5</i>                | 0.85791  | 3.53607  | 2.19699  | 0.54348  | 3.19453  | 1.869    |
| <i>SrFeTi-1-0.875-0.125</i>            | 1.55746  | 0.92974  | 1.2436   | 1.56892  | 0.52933  | 1.04912  |
| <i>SrKCo-0.875-0.125-1</i>             | 0.32613  | 0.09959  | 0.21286  | 0.10637  | -0.14991 | -0.02177 |
| <i>SrKCu-0.5-0.5-1</i>                 | -0.27159 | -2.58863 | -1.43011 | -0.17271 | -2.99449 | -1.5836  |
| <i>SrKCu-0.875-0.125-1</i>             | 0.16588  | -1.4692  | -0.65166 | 0.14396  | -2.04268 | -0.94936 |
| <i>SrKFe-0.625-0.375-1</i>             | 0.27688  | 0.12352  | 0.2002   | 0.01242  | -0.15055 | -0.06906 |
| <i>SrKFe-0.75-0.25-1</i>               | -0.11259 | 0.90245  | 0.39493  | -0.27418 | 0.70532  | 0.21557  |
| <i>SrKFe-0.875-0.125-1</i>             | 0.4351   | 0.57842  | 0.50676  | 0.17555  | 0.22575  | 0.20065  |
| <i>SrKFeCo-0.625-0.375-0.875-0.125</i> | 0.46623  | 0.08683  | 0.27653  | 0.24376  | -0.25977 | -0.00801 |
| <i>SrKFeCo-0.75-0.25-0.5-0.5</i>       | -0.06154 | -0.49176 | -0.27665 | -0.28926 | -0.73517 | -0.51221 |
| <i>SrKFeCo-0.75-0.25-0.625-0.375</i>   | -0.58778 | -0.18563 | -0.38671 | -0.8401  | -0.32931 | -0.58471 |
| <i>SrKFeCo-0.75-0.25-0.75-0.25</i>     | -0.64573 | 0.89503  | 0.12465  | -0.74525 | 0.57767  | -0.08379 |
| <i>SrKFeCo-0.75-0.25-0.875-0.125</i>   | 0.53772  | -0.43163 | 0.05305  | 0.27252  | -0.84421 | -0.28585 |
| <i>SrKFeCo-0.875-0.125-0.125-0.875</i> | -0.4385  | 0.19622  | -0.12114 | -0.68517 | -0.13265 | -0.40891 |
| <i>SrKFeCo-0.875-0.125-0.25-0.75</i>   | 0.00627  | 0.55861  | 0.28244  | -0.24075 | 0.20174  | -0.0195  |
| <i>SrKFeCo-0.875-0.125-0.375-0.625</i> | 0.02217  | -0.14107 | -0.05945 | -0.21808 | -0.32498 | -0.27153 |
| <i>SrKFeCo-0.875-0.125-0.5-0.5</i>     | -0.02441 | 0.3884   | 0.18199  | -0.45798 | 0.23396  | -0.11201 |



|                                        |          |          |          |          |          |          |
|----------------------------------------|----------|----------|----------|----------|----------|----------|
| <i>SrKFeCo-0.875-0.125-0.625-0.375</i> | -0.2318  | 0.39951  | 0.08386  | -0.50195 | 0.21075  | -0.1456  |
| <i>SrKFeCo-0.875-0.125-0.75-0.25</i>   | 0.44088  | 0.46146  | 0.45117  | 0.20654  | 0.14667  | 0.17661  |
| <i>SrKFeCo-0.875-0.125-0.875-0.125</i> | 0.70978  | -1.38273 | -0.33648 | 0.42536  | -1.77281 | -0.67373 |
| <i>SrKFeCu-0.125-0.875-0.125-0.875</i> | -3.56573 | 0.3403   | -1.61272 | -3.49344 | 0.42398  | -1.53473 |
| <i>SrKFeCu-0.125-0.875-0.375-0.625</i> | 2.27703  | -0.90466 | 0.68618  | 2.40971  | -1.19446 | 0.60763  |
| <i>SrKFeCu-0.125-0.875-0.625-0.375</i> | 0.42255  | -2.54874 | -1.06309 | 0.14748  | -3.01591 | -1.43421 |
| <i>SrKFeCu-0.125-0.875-0.75-0.25</i>   | -0.1797  | -1.73164 | -0.95567 | -0.19112 | -2.2997  | -1.24541 |
| <i>SrKFeCu-0.375-0.625-0.625-0.375</i> | 0.25204  | -1.55964 | -0.6538  | 0.01844  | -1.88087 | -0.93122 |
| <i>SrKFeCu-0.5-0.5-0.5-0.5</i>         | -1.28755 | -0.215   | -0.75127 | -1.50769 | -0.66291 | -1.0853  |
| <i>SrKFeCu-0.5-0.5-0.875-0.125</i>     | -1.10095 | 0.0163   | -0.54232 | -1.29034 | -0.34731 | -0.81882 |
| <i>SrKFeCu-0.625-0.375-0.75-0.25</i>   | 0.22437  | -0.6863  | -0.23096 | -0.04777 | -1.05265 | -0.55021 |
| <i>SrKFeCu-0.625-0.375-0.875-0.125</i> | 0.14754  | -1.03402 | -0.44324 | -0.06202 | -1.47115 | -0.76658 |
| <i>SrKFeCu-0.75-0.25-0.75-0.25</i>     | -0.48537 | 0.15085  | -0.16726 | -0.75465 | -0.18986 | -0.47225 |
| <i>SrKFeCu-0.75-0.25-0.875-0.125</i>   | 0.41123  | -0.55181 | -0.07029 | 0.20269  | -0.99857 | -0.39794 |
| <i>SrKFeCu-0.875-0.125-0.375-0.625</i> | -0.2075  | -0.44109 | -0.3243  | -0.44865 | -0.79641 | -0.62253 |
| <i>SrKFeCu-0.875-0.125-0.625-0.375</i> | -0.16109 | -0.32532 | -0.2432  | -0.34724 | -0.78853 | -0.56788 |
| <i>SrKFeCu-0.875-0.125-0.75-0.25</i>   | -0.0306  | -0.05543 | -0.04302 | -0.33458 | -0.33475 | -0.33467 |
| <i>SrKFeCu-0.875-0.125-0.875-0.125</i> | 0.41616  | -0.09319 | 0.16148  | 0.13947  | -0.44316 | -0.15185 |
| <i>SrKFeMg-0.625-0.375-0.75-0.25</i>   | -1.14769 | 0.31012  | -0.41878 | -1.36132 | 0.04543  | -0.65794 |
| <i>SrKFeMg-0.625-0.375-0.875-0.125</i> | 0.09236  | -0.84553 | -0.37659 | -0.1324  | -1.18919 | -0.6608  |
| <i>SrKFeMg-0.75-0.25-0.625-0.375</i>   | -0.8669  | 0.10657  | -0.38017 | -1.11685 | -0.10306 | -0.60995 |
| <i>SrKFeMg-0.75-0.25-0.75-0.25</i>     | -1.09015 | 0.44407  | -0.32304 | -1.28897 | 0.06198  | -0.61349 |
| <i>SrKFeMg-0.75-0.25-0.875-0.125</i>   | -0.31383 | 0.20031  | -0.05676 | -0.58005 | -0.14779 | -0.36392 |
| <i>SrKFeMg-0.875-0.125-0.625-0.375</i> | 0.0851   | -0.0433  | 0.0209   | -0.20243 | -0.21451 | -0.20847 |
| <i>SrKFeMg-0.875-0.125-0.75-0.25</i>   | 0.04609  | -0.0243  | 0.01089  | -0.16998 | -0.33737 | -0.25367 |
| <i>SrKFeMg-0.875-0.125-0.875-0.125</i> | 0.45844  | -0.21244 | 0.123    | 0.17354  | -0.4163  | -0.12138 |
| <i>SrKFeMn-0.625-0.375-0.875-0.125</i> | 1.07331  | -0.71463 | 0.17934  | 0.83066  | -0.9771  | -0.07322 |
| <i>SrKFeMn-0.75-0.25-0.5-0.5</i>       | -0.23817 | 0.35553  | 0.05868  | -0.46633 | 0.14599  | -0.16017 |
| <i>SrKFeMn-0.75-0.25-0.625-0.375</i>   | -0.71388 | 0.74743  | 0.01678  | -1.00754 | 0.65441  | -0.17657 |
| <i>SrKFeMn-0.75-0.25-0.75-0.25</i>     | -0.28377 | 0.3971   | 0.05667  | -0.4804  | 0.12049  | -0.17996 |
| <i>SrKFeMn-0.75-0.25-0.875-0.125</i>   | 0.59518  | -0.20352 | 0.19583  | 0.38351  | -0.48426 | -0.05037 |
| <i>SrKFeMn-0.875-0.125-0.125-0.875</i> | -0.05591 | -0.29622 | -0.17607 | -0.27951 | -0.59711 | -0.43831 |
| <i>SrKFeMn-0.875-0.125-0.25-0.75</i>   | -0.21904 | -0.0714  | -0.14522 | -0.47559 | -0.2962  | -0.3859  |
| <i>SrKFeMn-0.875-0.125-0.375-0.625</i> | 0.10576  | 0.35482  | 0.23029  | -0.10413 | 0.09299  | -0.00557 |
| <i>SrKFeMn-0.875-0.125-0.5-0.5</i>     | 0.06177  | -0.18926 | -0.06375 | -0.19983 | -0.39398 | -0.29691 |
| <i>SrKFeMn-0.875-0.125-0.625-0.375</i> | 0.48772  | -0.2765  | 0.10561  | 0.2402   | -0.46736 | -0.11358 |
| <i>SrKFeMn-0.875-0.125-0.75-0.25</i>   | 0.2193   | 0.27336  | 0.24633  | -0.10859 | -0.02782 | -0.0682  |
| <i>SrKFeMn-0.875-0.125-0.875-</i>      | 0.92075  | 0.16017  | 0.54046  | 0.71987  | -0.14502 | 0.28742  |



|                                         |          |          |          |          |          |          |
|-----------------------------------------|----------|----------|----------|----------|----------|----------|
| 0.125                                   |          |          |          |          |          |          |
| <i>SrKFeNi-0.75-0.25-0.75-0.25</i>      | -0.47914 | 0.13966  | -0.16974 | -0.58521 | -0.25486 | -0.42004 |
| <i>SrKFeNi-0.75-0.25-0.875-0.125</i>    | 0.75525  | -0.80193 | -0.02334 | 0.50437  | -1.11497 | -0.3053  |
| <i>SrKFeNi-0.875-0.125-0.625-0.375</i>  | -0.60228 | 0.7815   | 0.08961  | -0.78569 | 0.45153  | -0.16708 |
| <i>SrKFeNi-0.875-0.125-0.75-0.25</i>    | -0.12339 | 0.51694  | 0.19678  | -0.36093 | 0.13898  | -0.11097 |
| <i>SrKFeNi-0.875-0.125-0.875-0.125</i>  | 0.59643  | -0.62447 | -0.01402 | 0.338    | -0.96898 | -0.31549 |
| <i>SrKFeTi-0.5-0.5-0.25-0.75</i>        | -0.25532 | 1.39564  | 0.57016  | -0.49932 | 1.00396  | 0.25232  |
| <i>SrKFeTi-0.5-0.5-0.375-0.625</i>      | -0.03775 | -0.10745 | -0.0726  | -0.30546 | -0.3854  | -0.34543 |
| <i>SrKFeTi-0.625-0.375-0.125-0.875</i>  | 3.262    | 0.5101   | 1.88605  | 2.9852   | 0.0047   | 1.49495  |
| <i>SrKFeTi-0.625-0.375-0.375-0.625</i>  | -0.22395 | 0.22504  | 0.000545 | -0.51176 | -0.15198 | -0.33187 |
| <i>SrKFeTi-0.625-0.375-0.5-0.5</i>      | 0.12863  | -0.19959 | -0.03548 | -0.14006 | -0.55573 | -0.34789 |
| <i>SrKFeTi-0.625-0.375-0.75-0.25</i>    | -0.0417  | -0.60739 | -0.32455 | -0.24926 | -1.04443 | -0.64685 |
| <i>SrKFeTi-0.625-0.375-0.875-0.125</i>  | 0.24362  | -0.91506 | -0.33572 | 0.05812  | -1.36753 | -0.6547  |
| <i>SrKFeTi-0.75-0.25-0.375-0.625</i>    | 0.70457  | 1.76264  | 1.2336   | 0.42611  | 1.48214  | 0.95412  |
| <i>SrKFeTi-0.75-0.25-0.5-0.5</i>        | 0.31984  | 1.84649  | 1.08317  | 0.0311   | 1.40203  | 0.71656  |
| <i>SrKFeTi-0.75-0.25-0.625-0.375</i>    | -0.33637 | 1.13718  | 0.4004   | -0.6202  | 0.92807  | 0.15394  |
| <i>SrKFeTi-0.75-0.25-0.875-0.125</i>    | 0.32629  | -0.15063 | 0.08783  | 0.08407  | -0.53696 | -0.22644 |
| <i>SrKFeTi-0.875-0.125-0.75-0.25</i>    | -0.02739 | 1.35905  | 0.66583  | -0.24766 | 1.00446  | 0.3784   |
| <i>SrKFeTi-0.875-0.125-0.875-0.125</i>  | 0.93533  | -0.53521 | 0.20006  | 0.75475  | -0.83247 | -0.03886 |
| <i>SrLaCo-0.125-0.875-1</i>             | 3.68004  | 0.293    | 1.98652  | 3.42431  | -0.13268 | 1.64582  |
| <i>SrLaCo-0.25-0.75-1</i>               | 0.16004  | 0.80265  | 0.48134  | -0.32573 | 0.43363  | 0.05395  |
| <i>SrLaCo-0.5-0.5-1</i>                 | 0.88042  | 0.0103   | 0.44536  | 0.54493  | -0.27877 | 0.13308  |
| <i>SrLaCo-0.625-0.375-1</i>             | 1.42624  | 0.52924  | 0.97774  | 1.17748  | 0.12867  | 0.65308  |
| <i>SrLaCo-0.75-0.25-1</i>               | 0.56372  | 0.49102  | 0.52737  | 0.31562  | 0.36582  | 0.34072  |
| <i>SrLaCu-0.125-0.875-1</i>             | 0.81131  | -1.30224 | -0.24546 | 0.44871  | -1.62017 | -0.58573 |
| <i>SrLaCu-0.25-0.75-1</i>               | -0.66933 | 2.15936  | 0.74502  | -0.80403 | 1.76778  | 0.48188  |
| <i>SrLaCu-0.375-0.625-1</i>             | -0.21068 | 1.37047  | 0.5799   | -0.65424 | 1.2005   | 0.27313  |
| <i>SrLaCu-0.5-0.5-1</i>                 | 0.03656  | 0.4658   | 0.25118  | -0.27882 | 0.02871  | -0.12505 |
| <i>SrLaCu-0.625-0.375-1</i>             | 0.05413  | 0.24897  | 0.15155  | -0.22745 | -0.08991 | -0.15868 |
| <i>SrLaCu-0.75-0.25-1</i>               | -0.15676 | -0.02343 | -0.0901  | -0.1481  | -0.64962 | -0.39886 |
| <i>SrLaCu-0.875-0.125-1</i>             | 0.02287  | -0.65521 | -0.31617 | -0.08747 | -1.12175 | -0.60461 |
| <i>SrLaFe-0.5-0.5-1</i>                 | 2.14602  | 0.51565  | 1.33083  | 1.88335  | 0.04929  | 0.96632  |
| <i>SrLaFe-0.625-0.375-1</i>             | 2.83526  | 0.69181  | 1.76353  | 2.52663  | 0.27751  | 1.40207  |
| <i>SrLaFe-0.75-0.25-1</i>               | 2.75513  | 0.54941  | 1.65227  | 2.61476  | 0.12466  | 1.36971  |
| <i>SrLaFe-0.875-0.125-1</i>             | 1.57397  | 0.32304  | 0.94851  | 1.31192  | 0.19522  | 0.75357  |
| <i>SrLaFeCo-0.25-0.75-0.125-0.875</i>   | 1.44674  | 0.90571  | 1.17622  | 1.28737  | 0.45914  | 0.87325  |
| <i>SrLaFeCo-0.25-0.75-0.5-0.5</i>       | 2.27069  | 0.06594  | 1.16831  | 2.07215  | -0.32576 | 0.87319  |
| <i>SrLaFeCo-0.375-0.625-0.125-0.875</i> | 1.29647  | 0.99572  | 1.14609  | 1.01383  | 0.60432  | 0.80908  |
| <i>SrLaFeCo-0.5-0.5-0.125-0.875</i>     | 1.92718  | -0.20236 | 0.86241  | 1.65096  | -0.66663 | 0.49217  |
| <i>SrLaFeCo-0.5-0.5-0.25-0.75</i>       | 1.18425  | 0.42824  | 0.80625  | 0.86632  | 0.10544  | 0.48588  |
| <i>SrLaFeCo-0.5-0.5-0.375-0.625</i>     | 0.65301  | 1.56605  | 1.10953  | 1.09852  | 0.54848  | 0.8235   |
| <i>SrLaFeCo-0.5-0.5-0.5-0.5</i>         | 1.73807  | 0.79117  | 1.26462  | 1.41285  | 0.38986  | 0.90136  |
| <i>SrLaFeCo-0.5-0.5-0.75-0.25</i>       | 1.63016  | 0.82428  | 1.22722  | 1.32231  | 0.39632  | 0.85931  |
| <i>SrLaFeCo-0.625-0.375-0.125-0.875</i> | 0.74931  | 0.27358  | 0.51145  | 0.39053  | -0.0597  | 0.16541  |
| <i>SrLaFeCo-0.625-0.375-0.25-0.75</i>   | 0.16426  | 1.2507   | 0.70748  | -0.15427 | 0.80033  | 0.32303  |
| <i>SrLaFeCo-0.625-0.375-0.375-0.625</i> | 0.89273  | 0.05434  | 0.47353  | 0.61679  | -0.24997 | 0.18341  |
| <i>SrLaFeCo-0.625-0.375-0.5-0.5</i>     | 0.32677  | 2.01734  | 1.17205  | 0.00916  | 1.6192   | 0.81418  |

|                                         |          |          |          |          |          |          |
|-----------------------------------------|----------|----------|----------|----------|----------|----------|
| <i>SrLaFeCo-0.625-0.375-0.625-0.375</i> | 0.55737  | 1.04182  | 0.7996   | 0.31906  | 0.45983  | 0.38945  |
| <i>SrLaFeCo-0.625-0.375-0.75-0.25</i>   | 0.58463  | 0.75331  | 0.66897  | 0.39447  | 0.06819  | 0.23133  |
| <i>SrLaFeCo-0.625-0.375-0.875-0.125</i> | 2.60795  | 0.20591  | 1.40693  | 2.40602  | -0.18617 | 1.10993  |
| <i>SrLaFeCo-0.75-0.25-0.125-0.875</i>   | 0.70813  | 0.35365  | 0.53089  | 0.45239  | -0.00589 | 0.22325  |
| <i>SrLaFeCo-0.75-0.25-0.25-0.75</i>     | -0.20912 | 0.89351  | 0.34219  | -0.4812  | 0.61465  | 0.06673  |
| <i>SrLaFeCo-0.75-0.25-0.375-0.625</i>   | 0.49076  | -0.0199  | 0.23543  | 0.24983  | -0.24443 | 0.0027   |
| <i>SrLaFeCo-0.75-0.25-0.5-0.5</i>       | 0.5642   | 0.74358  | 0.65389  | 0.3201   | 0.4063   | 0.3632   |
| <i>SrLaFeCo-0.75-0.25-0.625-0.375</i>   | 0.09086  | 1.2109   | 0.65088  | -0.20148 | 0.8538   | 0.32616  |
| <i>SrLaFeCo-0.75-0.25-0.75-0.25</i>     | 0.68185  | 0.94588  | 0.81386  | 0.43332  | 0.61461  | 0.52397  |
| <i>SrLaFeCo-0.75-0.25-0.875-0.125</i>   | 1.9842   | 0.13183  | 1.05801  | 1.7628   | -0.19045 | 0.78617  |
| <i>SrLaFeCo-0.875-0.125-0.125-0.875</i> | 0.42866  | 0.48005  | 0.45436  | 0.10681  | 0.24468  | 0.17575  |
| <i>SrLaFeCo-0.875-0.125-0.25-0.75</i>   | 0.17304  | 0.49265  | 0.33284  | -0.10557 | 0.09846  | -0.00355 |
| <i>SrLaFeCo-0.875-0.125-0.375-0.625</i> | 0.21932  | 0.01147  | 0.11539  | -0.00418 | -0.2714  | -0.13779 |
| <i>SrLaFeCo-0.875-0.125-0.5-0.5</i>     | 0.56692  | 0.54863  | 0.55777  | 0.34608  | 0.09996  | 0.22302  |
| <i>SrLaFeCo-0.875-0.125-0.625-0.375</i> | -0.26392 | 1.31223  | 0.52415  | -0.51645 | 0.92644  | 0.20499  |
| <i>SrLaFeCo-0.875-0.125-0.75-0.25</i>   | 1.24548  | 0.22752  | 0.7365   | 1.00236  | -0.10929 | 0.44654  |
| <i>SrLaFeCo-0.875-0.125-0.875-0.125</i> | 1.94145  | -0.33718 | 0.80213  | 1.69496  | -0.71873 | 0.48811  |
| <i>SrLaFeCu-0.125-0.875-0.125-0.875</i> | 1.18276  | 0.79444  | 0.9886   | 0.88807  | 0.4102   | 0.64914  |
| <i>SrLaFeCu-0.125-0.875-0.25-0.75</i>   | 0.38452  | 2.11173  | 1.24813  | 0.082    | 1.75746  | 0.91973  |
| <i>SrLaFeCu-0.125-0.875-0.375-0.625</i> | 1.16823  | 0.23691  | 0.70257  | 0.87209  | -0.28334 | 0.29437  |
| <i>SrLaFeCu-0.125-0.875-0.875-0.125</i> | 2.93128  | 0.656    | 1.79364  | 2.68528  | 0.33124  | 1.50826  |
| <i>SrLaFeCu-0.25-0.75-0.125-0.875</i>   | -0.78406 | 2.28135  | 0.74865  | -1.07368 | 1.8777   | 0.40201  |
| <i>SrLaFeCu-0.25-0.75-0.25-0.75</i>     | 0.03458  | 1.93653  | 0.98556  | -0.15646 | 1.56662  | 0.70508  |
| <i>SrLaFeCu-0.25-0.75-0.5-0.5</i>       | 0.61175  | 2.23321  | 1.42248  | 0.38216  | 1.86955  | 1.12586  |
| <i>SrLaFeCu-0.25-0.75-0.625-0.375</i>   | 0.87042  | 0.64132  | 0.75587  | 0.64568  | 0.29887  | 0.47228  |
| <i>SrLaFeCu-0.375-0.625-0.125-0.875</i> | -0.57653 | 1.76784  | 0.59566  | -0.81129 | 1.35234  | 0.27052  |
| <i>SrLaFeCu-0.375-0.625-0.25-0.75</i>   | 0.52172  | 0.94557  | 0.73365  | 0.14839  | 0.64206  | 0.39523  |
| <i>SrLaFeCu-0.375-0.625-0.375-0.625</i> | 0.87807  | 1.31432  | 1.0962   | 0.54906  | 0.83003  | 0.68954  |
| <i>SrLaFeCu-0.375-0.625-0.5-0.5</i>     | 0.77292  | 1.45668  | 1.1148   | 0.50509  | 1.12662  | 0.81586  |
| <i>SrLaFeCu-0.375-0.625-0.625-0.375</i> | 0.65192  | 1.1777   | 0.91481  | 0.35589  | 0.84515  | 0.60052  |
| <i>SrLaFeCu-0.375-0.625-0.875-0.125</i> | 2.00469  | 0.96658  | 1.48564  | 1.77818  | 0.62385  | 1.20101  |
| <i>SrLaFeCu-0.5-0.5-0.125-0.875</i>     | 0.05004  | 0.5828   | 0.31642  | -0.2763  | -0.09359 | -0.18495 |
| <i>SrLaFeCu-0.5-0.5-0.25-0.75</i>       | 0.31725  | 0.12518  | 0.22122  | 0.02344  | -0.17733 | -0.07695 |
| <i>SrLaFeCu-0.5-0.5-0.375-0.625</i>     | 0.28518  | -0.67558 | -0.1952  | 0.02083  | -1.0157  | -0.49743 |
| <i>SrLaFeCu-0.5-0.5-0.5-0.5</i>         | 0.27506  | 1.27538  | 0.77522  | -0.09655 | 0.9804   | 0.44193  |
| <i>SrLaFeCu-0.5-0.5-0.625-0.375</i>     | 0.56717  | 1.3546   | 0.96088  | 0.27262  | 1.0262   | 0.64941  |
| <i>SrLaFeCu-0.5-0.5-0.75-0.25</i>       | 0.09017  | 1.92391  | 1.00704  | -0.2423  | 1.49031  | 0.624    |
| <i>SrLaFeCu-0.625-0.375-0.125-0.875</i> | 0.03965  | 0.05393  | 0.04679  | -0.22678 | -0.51246 | -0.36962 |
| <i>SrLaFeCu-0.625-0.375-0.25-0.75</i>   | -0.14723 | 0.62378  | 0.23827  | -0.40785 | 0.32914  | -0.03936 |
| <i>SrLaFeCu-0.625-0.375-0.375-</i>      | 0.49058  | -0.7829  | -0.14616 | 0.23073  | -1.02533 | -0.3973  |

|                                         |          |          |          |          |          |          |
|-----------------------------------------|----------|----------|----------|----------|----------|----------|
| 0.625                                   |          |          |          |          |          |          |
| <i>SrLaFeCu-0.625-0.375-0.5-0.5</i>     | 0.38042  | 0.68867  | 0.53455  | 0.06739  | 0.44223  | 0.25481  |
| <i>SrLaFeCu-0.625-0.375-0.625-0.375</i> | 0.56318  | 0.15869  | 0.36094  | 0.28582  | -0.07373 | 0.10604  |
| <i>SrLaFeCu-0.625-0.375-0.75-0.25</i>   | 1.29502  | 0.62416  | 0.95959  | 1.02282  | 0.19897  | 0.6109   |
| <i>SrLaFeCu-0.625-0.375-0.875-0.125</i> | 1.67945  | 0.52394  | 1.10169  | 1.38456  | 0.20282  | 0.79369  |
| <i>SrLaFeCu-0.75-0.25-0.25-0.75</i>     | 0.16365  | -0.02225 | 0.0707   | 0.02591  | -0.58632 | -0.2802  |
| <i>SrLaFeCu-0.75-0.25-0.375-0.625</i>   | 0.31246  | -0.41476 | -0.05115 | 0.12283  | -0.67957 | -0.27837 |
| <i>SrLaFeCu-0.75-0.25-0.5-0.5</i>       | 0.29462  | -0.04011 | 0.12726  | 0.14936  | -0.31138 | -0.08101 |
| <i>SrLaFeCu-0.75-0.25-0.625-0.375</i>   | 0.40215  | 0.32947  | 0.36581  | 0.18322  | -0.03735 | 0.07293  |
| <i>SrLaFeCu-0.75-0.25-0.75-0.25</i>     | 0.3811   | 0.81528  | 0.59819  | 0.13994  | 0.31209  | 0.22601  |
| <i>SrLaFeCu-0.75-0.25-0.875-0.125</i>   | 1.96148  | 0.65214  | 1.30681  | 1.79845  | 0.27969  | 1.03907  |
| <i>SrLaFeCu-0.875-0.125-0.125-0.875</i> | -0.68424 | 0.15925  | -0.2625  | -1.13987 | -0.06448 | -0.60218 |
| <i>SrLaFeCu-0.875-0.125-0.25-0.75</i>   | -0.08262 | -0.1966  | -0.13961 | -0.30133 | -0.58191 | -0.44162 |
| <i>SrLaFeCu-0.875-0.125-0.375-0.625</i> | -0.09784 | -0.29166 | -0.19475 | -0.36516 | -0.70236 | -0.53376 |
| <i>SrLaFeCu-0.875-0.125-0.5-0.5</i>     | -0.08061 | 0.1128   | 0.01609  | -0.28095 | -0.29067 | -0.28581 |
| <i>SrLaFeCu-0.875-0.125-0.625-0.375</i> | 0.21084  | 0.00885  | 0.10985  | -0.06084 | -0.39163 | -0.22623 |
| <i>SrLaFeCu-0.875-0.125-0.75-0.25</i>   | 0.38722  | 0.25224  | 0.31973  | 0.12097  | -0.07601 | 0.02248  |
| <i>SrLaFeCu-0.875-0.125-0.875-0.125</i> | 1.7064   | -0.38347 | 0.66146  | 1.40216  | -0.71137 | 0.3454   |
| <i>SrLaFeMg-0.125-0.875-0.125-0.875</i> | 0.05012  | -0.73381 | -0.34184 | -0.17267 | -0.84984 | -0.51126 |
| <i>SrLaFeMg-0.125-0.875-0.25-0.75</i>   | -0.14918 | 1.4312   | 0.64101  | -0.41551 | 1.14184  | 0.36317  |
| <i>SrLaFeMg-0.125-0.875-0.375-0.625</i> | 0.46341  | 2.29655  | 1.37998  | 0.17618  | 1.953    | 1.06459  |
| <i>SrLaFeMg-0.25-0.75-0.375-0.625</i>   | 0.11726  | 0.56336  | 0.34031  | -0.091   | 0.26861  | 0.08881  |
| <i>SrLaFeMg-0.25-0.75-0.5-0.5</i>       | 0.42843  | 1.5928   | 1.01061  | 0.21646  | 1.23473  | 0.72559  |
| <i>SrLaFeMg-0.375-0.625-0.25-0.75</i>   | 0.1947   | -0.11125 | 0.04172  | -0.02023 | -0.28894 | -0.15459 |
| <i>SrLaFeMg-0.375-0.625-0.375-0.625</i> | 0.06505  | -0.11926 | -0.0271  | -0.15424 | -0.43702 | -0.29563 |
| <i>SrLaFeMg-0.375-0.625-0.5-0.5</i>     | 1.10223  | 0.27977  | 0.691    | 0.81859  | -0.09708 | 0.36076  |
| <i>SrLaFeMg-0.375-0.625-0.75-0.25</i>   | 0.5136   | 2.45967  | 1.48664  | 0.16771  | 2.12576  | 1.14674  |
| <i>SrLaFeMg-0.5-0.5-0.25-0.75</i>       | -0.03509 | -1.35865 | -0.69687 | -0.24353 | -1.58339 | -0.91346 |
| <i>SrLaFeMg-0.5-0.5-0.5-0.5</i>         | -0.53523 | 1.27364  | 0.36921  | -0.78202 | 0.97298  | 0.09548  |
| <i>SrLaFeMg-0.5-0.5-0.625-0.375</i>     | 0.82703  | 1.24434  | 1.03568  | 0.58243  | 0.83153  | 0.70698  |
| <i>SrLaFeMg-0.5-0.5-0.75-0.25</i>       | 1.69079  | 0.83411  | 1.26245  | 1.58112  | 0.46248  | 1.0218   |
| <i>SrLaFeMg-0.5-0.5-0.875-0.125</i>     | 1.90651  | 0.64323  | 1.27487  | 1.65307  | 0.15968  | 0.90638  |
| <i>SrLaFeMg-0.625-0.375-0.375-0.625</i> | -0.79947 | 0.35726  | -0.22111 | -1.02208 | 0.04262  | -0.48973 |
| <i>SrLaFeMg-0.625-0.375-0.5-0.5</i>     | 0.60683  | 0.06856  | 0.33769  | 0.41889  | -0.25746 | 0.08072  |
| <i>SrLaFeMg-0.625-0.375-0.625-0.375</i> | 0.42686  | -0.14531 | 0.14078  | 0.22385  | -0.53302 | -0.15458 |
| <i>SrLaFeMg-0.625-0.375-0.75-0.25</i>   | 0.37278  | 1.8861   | 1.12944  | 0.0489   | 1.48458  | 0.76674  |
| <i>SrLaFeMg-0.625-0.375-0.875-0.125</i> | 1.47627  | 0.94085  | 1.20856  | 1.19306  | 0.62133  | 0.90719  |
| <i>SrLaFeMg-0.75-0.25-0.375-0.625</i>   | -0.68144 | 0.34249  | -0.16948 | -0.78041 | 0.05047  | -0.36497 |
| <i>SrLaFeMg-0.75-0.25-0.5-0.5</i>       | 0.09559  | -0.53654 | -0.22047 | -0.06251 | -0.8855  | -0.47401 |
| <i>SrLaFeMg-0.75-0.25-0.625-0.375</i>   | -0.12154 | 0.40085  | 0.13966  | -0.26469 | 0.10869  | -0.078   |
| <i>SrLaFeMg-0.75-0.25-0.75-0.25</i>     | -0.04071 | 1.63633  | 0.79781  | -0.34274 | 1.57948  | 0.61837  |

|                                         |          |          |          |          |          |          |
|-----------------------------------------|----------|----------|----------|----------|----------|----------|
| <i>SrLaFeMg-0.75-0.25-0.875-0.125</i>   | 2.00316  | 0.00461  | 1.00388  | 1.80279  | -0.30477 | 0.74901  |
| <i>SrLaFeMg-0.875-0.125-0.5-0.5</i>     | -0.57384 | -0.02222 | -0.29803 | -0.75739 | -0.36634 | -0.56186 |
| <i>SrLaFeMg-0.875-0.125-0.625-0.375</i> | 0.36097  | -0.32951 | 0.01573  | 0.16019  | -0.65736 | -0.24858 |
| <i>SrLaFeMg-0.875-0.125-0.75-0.25</i>   | 0.08061  | 0.52183  | 0.30122  | -0.13506 | 0.25454  | 0.05974  |
| <i>SrLaFeMg-0.875-0.125-0.875-0.125</i> | 0.39941  | 0.58209  | 0.49075  | 0.15359  | 0.29215  | 0.22287  |
| <i>SrLaFeMn-0.5-0.5-0.375-0.625</i>     | 3.33884  | 0.87493  | 2.10688  | 3.09223  | 0.50179  | 1.79701  |
| <i>SrLaFeMn-0.5-0.5-0.5-0.5</i>         | 2.23249  | 1.06014  | 1.64632  | 2.36341  | 0.36895  | 1.36618  |
| <i>SrLaFeMn-0.5-0.5-0.625-0.375</i>     | 2.09123  | 0.70931  | 1.40027  | 1.83927  | 0.26678  | 1.05303  |
| <i>SrLaFeMn-0.625-0.375-0.75-0.25</i>   | 0.61376  | 2.19638  | 1.40507  | 0.40861  | 1.8758   | 1.14221  |
| <i>SrLaFeMn-0.75-0.25-0.375-0.625</i>   | 1.39164  | 0.37472  | 0.88318  | 1.21516  | -0.02446 | 0.59535  |
| <i>SrLaFeMn-0.75-0.25-0.625-0.375</i>   | 0.44166  | 1.41633  | 0.92899  | 0.29327  | 1.04992  | 0.67159  |
| <i>SrLaFeMn-0.75-0.25-0.875-0.125</i>   | 1.50415  | -0.17089 | 0.66663  | 1.19439  | -0.37645 | 0.40897  |
| <i>SrLaFeMn-0.875-0.125-0.125-0.875</i> | 0.62728  | 0.58765  | 0.60747  | 0.31092  | 0.20223  | 0.25657  |
| <i>SrLaFeMn-0.875-0.125-0.25-0.75</i>   | 0.73902  | 0.97918  | 0.8591   | 0.40297  | 0.61828  | 0.51062  |
| <i>SrLaFeMn-0.875-0.125-0.375-0.625</i> | 0.77193  | 0.3399   | 0.55592  | 0.47563  | -0.07038 | 0.20262  |
| <i>SrLaFeMn-0.875-0.125-0.5-0.5</i>     | 0.42348  | 1.86598  | 1.14473  | 0.19144  | 1.43797  | 0.8147   |
| <i>SrLaFeMn-0.875-0.125-0.625-0.375</i> | 0.63429  | 1.4649   | 1.04959  | 0.41774  | 1.18761  | 0.80268  |
| <i>SrLaFeMn-0.875-0.125-0.75-0.25</i>   | 0.43067  | 1.81654  | 1.12361  | 0.16849  | 1.60711  | 0.8878   |
| <i>SrLaFeMn-0.875-0.125-0.875-0.125</i> | 1.1407   | 0.53864  | 0.83967  | 0.89583  | 0.23217  | 0.564    |
| <i>SrLaFeNi-0.125-0.875-0.125-0.875</i> | 1.53836  | 0.73519  | 1.13677  | 1.20528  | 0.28856  | 0.74692  |
| <i>SrLaFeNi-0.125-0.875-0.375-0.625</i> | 1.77865  | 0.70678  | 1.24272  | 1.42857  | 0.32436  | 0.87647  |
| <i>SrLaFeNi-0.125-0.875-0.875-0.125</i> | 3.14721  | 0.57174  | 1.85948  | 2.95957  | 0.21119  | 1.58538  |
| <i>SrLaFeNi-0.25-0.75-0.125-0.875</i>   | 0.54294  | 0.0509   | 0.29692  | 0.34785  | -0.34141 | 0.00322  |
| <i>SrLaFeNi-0.25-0.75-0.25-0.75</i>     | -0.02689 | 1.06733  | 0.52022  | -0.28497 | 0.61495  | 0.16499  |
| <i>SrLaFeNi-0.25-0.75-0.375-0.625</i>   | 0.38065  | 0.93346  | 0.65705  | 0.27206  | 0.54696  | 0.40951  |
| <i>SrLaFeNi-0.25-0.75-0.5-0.5</i>       | 0.48299  | 2.66866  | 1.57582  | 0.19852  | 2.40051  | 1.29952  |
| <i>SrLaFeNi-0.25-0.75-0.75-0.25</i>     | 2.16782  | 0.67932  | 1.42357  | 1.90029  | 0.19973  | 1.05001  |
| <i>SrLaFeNi-0.375-0.625-0.125-0.875</i> | 0.61531  | 0.34358  | 0.47944  | 0.36103  | -0.08201 | 0.13951  |
| <i>SrLaFeNi-0.375-0.625-0.25-0.75</i>   | 0.83746  | 0.57032  | 0.70389  | 0.52418  | 0.16384  | 0.34401  |
| <i>SrLaFeNi-0.375-0.625-0.375-0.625</i> | 1.17662  | 0.07829  | 0.62745  | 0.89002  | -0.176   | 0.35701  |
| <i>SrLaFeNi-0.5-0.5-0.125-0.875</i>     | 0.18316  | 0.52621  | 0.35469  | -0.08688 | 0.14479  | 0.02895  |
| <i>SrLaFeNi-0.5-0.5-0.25-0.75</i>       | 0.36177  | 0.25559  | 0.30868  | 0.06507  | -0.18237 | -0.05865 |
| <i>SrLaFeNi-0.5-0.5-0.375-0.625</i>     | 0.16156  | 1.48772  | 0.82464  | -0.13532 | 1.04434  | 0.45451  |
| <i>SrLaFeNi-0.5-0.5-0.5-0.5</i>         | 1.54173  | 0.01676  | 0.77925  | 1.2395   | -0.48183 | 0.37884  |
| <i>SrLaFeNi-0.5-0.5-0.625-0.375</i>     | 1.55086  | -0.17541 | 0.68773  | 1.25961  | -0.49633 | 0.38164  |
| <i>SrLaFeNi-0.5-0.5-0.875-0.125</i>     | 1.65166  | 1.01011  | 1.33088  | 1.21049  | 0.68071  | 0.9456   |
| <i>SrLaFeNi-0.625-0.375-0.125-0.875</i> | 0.15387  | -0.21813 | -0.03213 | -0.08651 | -0.6394  | -0.36296 |
| <i>SrLaFeNi-0.625-0.375-0.25-0.75</i>   | 0.00837  | 0.10142  | 0.0549   | -0.131   | -0.41593 | -0.27346 |
| <i>SrLaFeNi-0.625-0.375-0.375-0.625</i> | 0.48636  | 0.4003   | 0.44333  | 0.18895  | -0.02978 | 0.07958  |
| <i>SrLaFeNi-0.625-0.375-0.5-0.5</i>     | 0.78704  | 0.21937  | 0.5032   | 0.4842   | -0.14534 | 0.16943  |

|                                         |          |          |          |          |          |          |
|-----------------------------------------|----------|----------|----------|----------|----------|----------|
| <i>SrLaFeNi-0.625-0.375-0.625-0.375</i> | 0.5621   | 0.39105  | 0.47657  | 0.2683   | 0.0213   | 0.1448   |
| <i>SrLaFeNi-0.625-0.375-0.75-0.25</i>   | 1.69901  | 0.59414  | 1.14657  | 1.47758  | -0.00535 | 0.73611  |
| <i>SrLaFeNi-0.625-0.375-0.875-0.125</i> | 2.03665  | -0.1031  | 0.96678  | 1.72145  | -0.49671 | 0.61237  |
| <i>SrLaFeNi-0.75-0.25-0.125-0.875</i>   | -0.47986 | -0.21033 | -0.34509 | -0.674   | -0.49687 | -0.58544 |
| <i>SrLaFeNi-0.75-0.25-0.25-0.75</i>     | -0.45227 | 0.26829  | -0.09199 | -0.64629 | -0.14655 | -0.39642 |
| <i>SrLaFeNi-0.75-0.25-0.375-0.625</i>   | -0.33838 | 0.95648  | 0.30905  | -0.58976 | 0.68094  | 0.04559  |
| <i>SrLaFeNi-0.75-0.25-0.5-0.5</i>       | -0.05661 | 1.30508  | 0.62423  | -0.25382 | 0.83831  | 0.29225  |
| <i>SrLaFeNi-0.75-0.25-0.625-0.375</i>   | -0.19308 | 0.5917   | 0.19931  | -0.46636 | 0.24789  | -0.10924 |
| <i>SrLaFeNi-0.75-0.25-0.75-0.25</i>     | 0.883    | 0.13954  | 0.51127  | 0.64619  | -0.17771 | 0.23424  |
| <i>SrLaFeNi-0.75-0.25-0.875-0.125</i>   | 2.19444  | 0.11553  | 1.15499  | 1.92855  | -0.26639 | 0.83108  |
| <i>SrLaFeNi-0.875-0.125-0.125-0.875</i> | -0.08182 | -0.61497 | -0.34839 | -0.29914 | -0.95223 | -0.62568 |
| <i>SrLaFeNi-0.875-0.125-0.25-0.75</i>   | -0.32233 | -0.04798 | -0.18515 | -0.58764 | -0.31109 | -0.44937 |
| <i>SrLaFeNi-0.875-0.125-0.375-0.625</i> | -0.03134 | -0.00789 | -0.01961 | -0.26534 | -0.27063 | -0.26798 |
| <i>SrLaFeNi-0.875-0.125-0.5-0.5</i>     | -0.10524 | 0.19573  | 0.04525  | -0.37239 | -0.14117 | -0.25678 |
| <i>SrLaFeNi-0.875-0.125-0.625-0.375</i> | 0.19229  | 0.60972  | 0.401    | -0.10601 | 0.11205  | 0.00302  |
| <i>SrLaFeNi-0.875-0.125-0.75-0.25</i>   | 0.29413  | 0.47088  | 0.3825   | 0.0507   | 0.09388  | 0.07229  |
| <i>SrLaFeNi-0.875-0.125-0.875-0.125</i> | 1.30503  | -0.27596 | 0.51453  | 1.05227  | -0.59826 | 0.227    |
| <i>SrLaFeTi-0.75-0.25-0.875-0.125</i>   | 2.06691  | 0.67766  | 1.37228  | 1.72932  | 0.31155  | 1.02044  |
| <i>SrLaFeTi-0.875-0.125-0.625-0.375</i> | 2.37639  | 0.89782  | 1.63711  | 2.13925  | 0.45036  | 1.2948   |
| <i>SrLaFeTi-0.875-0.125-0.875-0.125</i> | 1.72143  | 0.55708  | 1.13925  | 1.53174  | 0.132    | 0.83187  |
| <i>SrLaMn-0.875-0.125-1</i>             | 0.48708  | 0.55239  | 0.51973  | 0.13338  | 0.14077  | 0.13708  |
| <i>SrLaNi-0.125-0.875-1</i>             | -0.18071 | 1.43928  | 0.62929  | -0.53349 | 1.03684  | 0.25167  |
| <i>SrLaNi-0.25-0.75-1</i>               | -0.64604 | 1.59257  | 0.47326  | -0.83218 | 1.25928  | 0.21355  |
| <i>SrLaNi-0.375-0.625-1</i>             | 0.09556  | 0.29927  | 0.19741  | -0.15627 | -0.20972 | -0.183   |
| <i>SrLaNi-0.5-0.5-1</i>                 | -0.234   | -0.59916 | -0.41658 | -0.47168 | -0.92578 | -0.69873 |
| <i>SrLaNi-0.625-0.375-1</i>             | 0.11468  | -0.43722 | -0.16127 | -0.12937 | -0.74308 | -0.43623 |
| <i>SrLaNi-0.875-0.125-1</i>             | 0.29738  | -0.47648 | -0.08955 | 0.17291  | -0.81993 | -0.32351 |
| <i>SrMn-1-1</i>                         | 0.18261  | -1.52353 | -0.67046 | -0.05988 | -1.71992 | -0.8899  |
| <i>SrSmCo-0.25-0.75-1</i>               | -1.47552 | 3.01564  | 0.77006  | -1.77194 | 2.6443   | 0.43618  |
| <i>SrSmCo-0.375-0.625-1</i>             | 0.68593  | 2.81165  | 1.74879  | 0.34467  | 2.54355  | 1.44411  |
| <i>SrSmCo-0.5-0.5-1</i>                 | 1.49519  | 0.73053  | 1.11286  | 1.3258   | 0.2231   | 0.77445  |
| <i>SrSmCo-0.625-0.375-1</i>             | -0.15986 | 1.9613   | 0.90072  | -0.47092 | 1.54723  | 0.53815  |
| <i>SrSmCo-0.75-0.25-1</i>               | 0.000202 | 1.10509  | 0.55264  | -0.17899 | 0.6905   | 0.25576  |
| <i>SrSmCo-0.875-0.125-1</i>             | 0.72377  | -0.06512 | 0.32932  | 0.42045  | -0.26822 | 0.07612  |
| <i>SrSmCu-0.125-0.875-1</i>             | 2.08747  | 0.76393  | 1.4257   | 1.82384  | 0.28387  | 1.05385  |
| <i>SrSmCu-0.25-0.75-1</i>               | -1.01022 | 1.42675  | 0.20827  | -1.08095 | 0.94429  | -0.06833 |
| <i>SrSmCu-0.375-0.625-1</i>             | -0.46202 | 0.5656   | 0.05179  | -0.66033 | 0.20544  | -0.22745 |
| <i>SrSmCu-0.5-0.5-1</i>                 | -0.74783 | 0.54685  | -0.10049 | -0.96977 | 0.12238  | -0.4237  |
| <i>SrSmCu-0.625-0.375-1</i>             | -0.18836 | -0.37065 | -0.2795  | -0.4937  | -0.82592 | -0.65981 |
| <i>SrSmCu-0.75-0.25-1</i>               | 0.47917  | -0.08697 | 0.1961   | 0.15764  | -0.63965 | -0.24101 |
| <i>SrSmCu-0.875-0.125-1</i>             | 0.01097  | -1.13222 | -0.56062 | -0.37433 | -1.37123 | -0.87278 |
| <i>SrSmFe-0.625-0.375-1</i>             | 2.80574  | 0.21901  | 1.51237  | 2.55061  | -0.16191 | 1.19435  |
| <i>SrSmFe-0.75-0.25-1</i>               | 1.41655  | 0.30746  | 0.862    | 1.26912  | 0.0575   | 0.66331  |
| <i>SrSmFe-0.875-0.125-1</i>             | 2.13616  | -0.05856 | 1.0388   | 1.92382  | -0.38817 | 0.76783  |



|                                         |          |          |          |          |          |          |
|-----------------------------------------|----------|----------|----------|----------|----------|----------|
| <i>SrSmFeCo-0.25-0.75-0.25-0.75</i>     | -0.14951 | 2.40223  | 1.12636  | -0.39564 | 2.00377  | 0.80407  |
| <i>SrSmFeCo-0.25-0.75-0.375-0.625</i>   | 2.15787  | 0.34936  | 1.25361  | 2.02047  | -0.04662 | 0.98693  |
| <i>SrSmFeCo-0.25-0.75-0.625-0.375</i>   | 0.39866  | 2.88171  | 1.64018  | 0.1467   | 2.61487  | 1.38078  |
| <i>SrSmFeCo-0.25-0.75-0.75-0.25</i>     | 0.62371  | 1.66627  | 1.14499  | 0.3336   | 1.34276  | 0.83818  |
| <i>SrSmFeCo-0.375-0.625-0.25-0.75</i>   | 0.69861  | 2.66156  | 1.68009  | 0.3311   | 2.38828  | 1.35969  |
| <i>SrSmFeCo-0.375-0.625-0.375-0.625</i> | 1.18511  | 1.08422  | 1.13466  | 0.86687  | 0.66511  | 0.76599  |
| <i>SrSmFeCo-0.5-0.5-0.125-0.875</i>     | 0.60059  | 2.12674  | 1.36366  | 0.2561   | 1.78611  | 1.02111  |
| <i>SrSmFeCo-0.5-0.5-0.625-0.375</i>     | 1.85233  | 0.85618  | 1.35425  | 1.55067  | 0.61754  | 1.0841   |
| <i>SrSmFeCo-0.5-0.5-0.875-0.125</i>     | 3.20916  | 1.01677  | 2.11296  | 3.13364  | 0.56453  | 1.84909  |
| <i>SrSmFeCo-0.625-0.375-0.125-0.875</i> | 1.30093  | -0.90216 | 0.19939  | 1.21268  | -1.46069 | -0.12401 |
| <i>SrSmFeCo-0.625-0.375-0.25-0.75</i>   | 0.76687  | 1.007    | 0.88694  | 0.43376  | 0.59872  | 0.51624  |
| <i>SrSmFeCo-0.625-0.375-0.375-0.625</i> | 0.26594  | 1.7275   | 0.99672  | -0.15391 | 1.41493  | 0.63051  |
| <i>SrSmFeCo-0.625-0.375-0.5-0.5</i>     | 1.42654  | 0.69147  | 1.059    | 1.05884  | 0.39979  | 0.72932  |
| <i>SrSmFeCo-0.625-0.375-0.875-0.125</i> | 2.20402  | 0.22773  | 1.21587  | 1.88728  | -0.03347 | 0.9269   |
| <i>SrSmFeCo-0.75-0.25-0.125-0.875</i>   | 0.52625  | 0.39269  | 0.45947  | 0.28067  | 0.02112  | 0.1509   |
| <i>SrSmFeCo-0.75-0.25-0.375-0.625</i>   | 0.44143  | 1.09064  | 0.76604  | 0.18672  | 0.82122  | 0.50397  |
| <i>SrSmFeCo-0.75-0.25-0.5-0.5</i>       | 0.28198  | 1.05293  | 0.66745  | 0.07496  | 0.71165  | 0.39331  |
| <i>SrSmFeCo-0.75-0.25-0.625-0.375</i>   | 0.89695  | 0.84851  | 0.87273  | 0.74667  | 0.51567  | 0.63117  |
| <i>SrSmFeCo-0.75-0.25-0.75-0.25</i>     | -0.00244 | 1.32661  | 0.66208  | -0.40946 | 1.12745  | 0.359    |
| <i>SrSmFeCo-0.75-0.25-0.875-0.125</i>   | 1.63082  | 0.61887  | 1.12484  | 1.38979  | 0.43182  | 0.91081  |
| <i>SrSmFeCo-0.875-0.125-0.125-0.875</i> | 0.44776  | -0.07891 | 0.18443  | 0.14791  | -0.49207 | -0.17208 |
| <i>SrSmFeCo-0.875-0.125-0.25-0.75</i>   | 0.0328   | 0.80436  | 0.41858  | -0.25156 | 0.49609  | 0.12226  |
| <i>SrSmFeCo-0.875-0.125-0.375-0.625</i> | 0.55228  | -0.26361 | 0.14433  | 0.334    | -0.55599 | -0.11099 |
| <i>SrSmFeCo-0.875-0.125-0.5-0.5</i>     | 0.80363  | 0.83678  | 0.82021  | 0.55006  | 0.52218  | 0.53612  |
| <i>SrSmFeCo-0.875-0.125-0.625-0.375</i> | -0.07477 | 1.1475   | 0.53637  | -0.33514 | 0.54798  | 0.10642  |
| <i>SrSmFeCo-0.875-0.125-0.75-0.25</i>   | 0.83537  | 0.25485  | 0.54511  | 0.55689  | -0.10569 | 0.2256   |
| <i>SrSmFeCo-0.875-0.125-0.875-0.125</i> | 1.77795  | 0.36146  | 1.0697   | 1.59897  | 0.04752  | 0.82324  |
| <i>SrSmFeCu-0.125-0.875-0.125-0.875</i> | 0.07852  | 2.0598   | 1.06916  | -0.17637 | 1.69254  | 0.75808  |
| <i>SrSmFeCu-0.125-0.875-0.375-0.625</i> | 1.35266  | 0.58809  | 0.97037  | 1.05745  | 0.08599  | 0.57172  |
| <i>SrSmFeCu-0.25-0.75-0.125-0.875</i>   | -1.57461 | 1.3047   | -0.13495 | -1.77895 | 0.86905  | -0.45495 |
| <i>SrSmFeCu-0.25-0.75-0.25-0.75</i>     | 0.16425  | 0.79135  | 0.4778   | -0.1976  | 0.45639  | 0.12939  |
| <i>SrSmFeCu-0.25-0.75-0.375-0.625</i>   | -0.2592  | 1.61557  | 0.67819  | -0.57967 | 1.20887  | 0.3146   |
| <i>SrSmFeCu-0.25-0.75-0.5-0.5</i>       | 0.05087  | 2.37639  | 1.21363  | -0.35113 | 2.06366  | 0.85626  |
| <i>SrSmFeCu-0.25-0.75-0.625-0.375</i>   | 0.29492  | 0.6761   | 0.48551  | 0.03944  | 0.26556  | 0.1525   |
| <i>SrSmFeCu-0.25-0.75-0.75-0.25</i>     | 0.86245  | 2.57416  | 1.7183   | 0.50637  | 2.30464  | 1.4055   |
| <i>SrSmFeCu-0.375-0.625-0.125-0.875</i> | -0.52129 | 1.79901  | 0.63886  | -0.76729 | 1.41117  | 0.32194  |
| <i>SrSmFeCu-0.375-0.625-0.25-0.75</i>   | -0.08008 | 1.11444  | 0.51718  | -0.36716 | 0.71535  | 0.17409  |
| <i>SrSmFeCu-0.375-0.625-0.375-0.625</i> | 0.65     | 0.75919  | 0.70459  | 0.284    | 0.4605   | 0.37225  |
| <i>SrSmFeCu-0.375-0.625-0.5-0.5</i>     | 1.36113  | 0.85183  | 1.10648  | 1.04615  | 0.556    | 0.80107  |
| <i>SrSmFeCu-0.375-0.625-0.625-0.375</i> | 1.71226  | 0.30469  | 1.00847  | 1.38441  | 0.01442  | 0.69942  |



|                                         |          |          |          |          |          |          |
|-----------------------------------------|----------|----------|----------|----------|----------|----------|
| <i>SrSmFeCu-0.375-0.625-0.875-0.125</i> | 0.96906  | 2.69191  | 1.83049  | 0.6073   | 2.33196  | 1.46963  |
| <i>SrSmFeCu-0.5-0.5-0.125-0.875</i>     | -0.661   | 1.27017  | 0.30459  | -0.90933 | 0.80689  | -0.05122 |
| <i>SrSmFeCu-0.5-0.5-0.25-0.75</i>       | 0.16855  | -0.98497 | -0.40821 | -0.14566 | -1.29685 | -0.72125 |
| <i>SrSmFeCu-0.5-0.5-0.375-0.625</i>     | -0.12605 | 0.37337  | 0.12366  | -0.42644 | 0.05003  | -0.18821 |
| <i>SrSmFeCu-0.5-0.5-0.5-0.5</i>         | 0.61119  | 0.58763  | 0.59941  | 0.24668  | 0.28835  | 0.26751  |
| <i>SrSmFeCu-0.5-0.5-0.625-0.375</i>     | 0.31093  | 1.66782  | 0.98938  | -0.03208 | 1.36674  | 0.66733  |
| <i>SrSmFeCu-0.5-0.5-0.75-0.25</i>       | 0.3834   | 2.40395  | 1.39367  | 0.02976  | 2.07454  | 1.05215  |
| <i>SrSmFeCu-0.5-0.5-0.875-0.125</i>     | 2.17814  | 0.71709  | 1.44762  | 1.91762  | 0.33176  | 1.12469  |
| <i>SrSmFeCu-0.625-0.375-0.125-0.875</i> | -1.07341 | 1.09461  | 0.0106   | -1.35079 | 0.77782  | -0.28649 |
| <i>SrSmFeCu-0.625-0.375-0.25-0.75</i>   | 0.10814  | 0.48144  | 0.29479  | -0.19438 | 0.13206  | -0.03116 |
| <i>SrSmFeCu-0.625-0.375-0.375-0.625</i> | 0.09208  | 0.0648   | 0.07844  | -0.20991 | -0.22447 | -0.21719 |
| <i>SrSmFeCu-0.625-0.375-0.5-0.5</i>     | 0.14182  | -0.30413 | -0.08115 | -0.16834 | -0.54091 | -0.35463 |
| <i>SrSmFeCu-0.625-0.375-0.625-0.375</i> | -0.53462 | 1.44876  | 0.45707  | -0.88336 | 1.18716  | 0.1519   |
| <i>SrSmFeCu-0.625-0.375-0.75-0.25</i>   | 1.30416  | 0.98458  | 1.14437  | 1.00623  | 0.56839  | 0.78731  |
| <i>SrSmFeCu-0.625-0.375-0.875-0.125</i> | 1.92525  | 0.13987  | 1.03256  | 1.75241  | -0.36572 | 0.69334  |
| <i>SrSmFeCu-0.75-0.25-0.125-0.875</i>   | 0.13973  | -0.14109 | -0.00068 | -0.13437 | -0.42728 | -0.28082 |
| <i>SrSmFeCu-0.75-0.25-0.25-0.75</i>     | -0.23533 | 0.46607  | 0.11537  | -0.47438 | 0.14649  | -0.16394 |
| <i>SrSmFeCu-0.75-0.25-0.375-0.625</i>   | -0.35032 | -0.04866 | -0.19949 | -0.68306 | -0.2393  | -0.46118 |
| <i>SrSmFeCu-0.75-0.25-0.5-0.5</i>       | 0.0751   | 0.59838  | 0.33674  | -0.14225 | 0.20816  | 0.03295  |
| <i>SrSmFeCu-0.75-0.25-0.625-0.375</i>   | -0.75915 | 0.46248  | -0.14834 | -0.98516 | 0.19283  | -0.39616 |
| <i>SrSmFeCu-0.75-0.25-0.75-0.25</i>     | 0.39129  | 1.31273  | 0.85201  | 0.26401  | 0.9838   | 0.62391  |
| <i>SrSmFeCu-0.75-0.25-0.875-0.125</i>   | 1.64149  | 0.70062  | 1.17106  | 1.44168  | 0.47271  | 0.9572   |
| <i>SrSmFeCu-0.875-0.125-0.25-0.75</i>   | -0.38915 | 0.02408  | -0.18254 | -0.71823 | -0.4108  | -0.56452 |
| <i>SrSmFeCu-0.875-0.125-0.5-0.5</i>     | -0.3683  | 0.59557  | 0.11364  | -0.72015 | 0.3395   | -0.19032 |
| <i>SrSmFeCu-0.875-0.125-0.625-0.375</i> | -0.25537 | 0.11318  | -0.0711  | -0.54513 | -0.17615 | -0.36064 |
| <i>SrSmFeCu-0.875-0.125-0.75-0.25</i>   | 0.11258  | 0.83179  | 0.47219  | -0.16924 | 0.52355  | 0.17716  |
| <i>SrSmFeCu-0.875-0.125-0.875-0.125</i> | 0.96817  | 0.76125  | 0.86471  | 0.68616  | 0.58371  | 0.63494  |
| <i>SrSmFeMg-0.125-0.875-0.125-0.875</i> | -0.76508 | 1.00173  | 0.11832  | -1.10862 | 0.9105   | -0.09906 |
| <i>SrSmFeMg-0.125-0.875-0.25-0.75</i>   | 0.02777  | 1.84902  | 0.9384   | -0.2142  | 1.57023  | 0.67802  |
| <i>SrSmFeMg-0.25-0.75-0.125-0.875</i>   | -2.61498 | 0.0851   | -1.26494 | -2.91555 | -0.09144 | -1.50349 |
| <i>SrSmFeMg-0.25-0.75-0.25-0.75</i>     | -0.98266 | -0.02963 | -0.50614 | -1.05802 | -0.29112 | -0.67457 |
| <i>SrSmFeMg-0.25-0.75-0.375-0.625</i>   | -0.54893 | -0.09188 | -0.32041 | -0.69437 | -0.39705 | -0.54571 |
| <i>SrSmFeMg-0.25-0.75-0.5-0.5</i>       | -0.26943 | 1.32353  | 0.52705  | -0.52485 | 1.01237  | 0.24376  |
| <i>SrSmFeMg-0.25-0.75-0.625-0.375</i>   | 0.25385  | 1.28581  | 0.76983  | -0.02613 | 0.85435  | 0.41411  |
| <i>SrSmFeMg-0.25-0.75-0.75-0.25</i>     | -0.3154  | 1.58686  | 0.63573  | -0.66258 | 1.28034  | 0.30888  |
| <i>SrSmFeMg-0.25-0.75-0.875-0.125</i>   | 0.52609  | 3.45118  | 1.98864  | 0.16974  | 3.23749  | 1.70361  |
| <i>SrSmFeMg-0.375-0.625-0.25-0.75</i>   | -0.7096  | 0.35151  | -0.17904 | -0.86871 | 0.01246  | -0.42813 |
| <i>SrSmFeMg-0.375-0.625-0.375-0.625</i> | -0.2261  | 0.88476  | 0.32933  | -0.44027 | 0.64773  | 0.10373  |
| <i>SrSmFeMg-0.375-0.625-0.625-0.375</i> | 0.53922  | 2.56807  | 1.55365  | 0.3672   | 2.38241  | 1.3748   |
| <i>SrSmFeMg-0.5-0.5-0.375-0.625</i>     | -0.84834 | 1.40397  | 0.27781  | -1.03487 | 1.10833  | 0.03673  |
| <i>SrSmFeMg-0.5-0.5-0.5-0.5</i>         | 0.00451  | 0.17648  | 0.09049  | -0.23262 | -0.03788 | -0.13525 |
| <i>SrSmFeMg-0.5-0.5-0.625-0.375</i>     | 1.11396  | 0.26077  | 0.68736  | 0.81151  | 0.01633  | 0.41392  |

|                                         |          |          |          |          |          |          |
|-----------------------------------------|----------|----------|----------|----------|----------|----------|
| <i>SrSmFeMg-0.625-0.375-0.375-0.625</i> | -0.79595 | 0.50664  | -0.14465 | -1.04618 | 0.20052  | -0.42283 |
| <i>SrSmFeMg-0.625-0.375-0.5-0.5</i>     | -0.46991 | 0.16323  | -0.15334 | -0.71815 | -0.14257 | -0.43036 |
| <i>SrSmFeMg-0.625-0.375-0.625-0.375</i> | -0.00826 | 0.95443  | 0.47309  | -0.28809 | 0.77858  | 0.24524  |
| <i>SrSmFeMg-0.625-0.375-0.75-0.25</i>   | 0.21296  | 1.95974  | 1.08635  | -0.07091 | 1.62624  | 0.77766  |
| <i>SrSmFeMg-0.625-0.375-0.875-0.125</i> | 1.77052  | 0.83383  | 1.30218  | 1.47111  | 0.55708  | 1.0141   |
| <i>SrSmFeMg-0.75-0.25-0.375-0.625</i>   | -1.68734 | 1.24635  | -0.22049 | -1.91151 | 0.90464  | -0.50344 |
| <i>SrSmFeMg-0.75-0.25-0.5-0.5</i>       | -0.80439 | 0.49612  | -0.15414 | -1.01576 | 0.22598  | -0.39489 |
| <i>SrSmFeMg-0.75-0.25-0.625-0.375</i>   | -0.05727 | 0.32762  | 0.13517  | -0.26284 | 0.11872  | -0.07206 |
| <i>SrSmFeMg-0.75-0.25-0.75-0.25</i>     | -0.94306 | 0.78537  | -0.07884 | -1.21151 | 0.72705  | -0.24223 |
| <i>SrSmFeMg-0.75-0.25-0.875-0.125</i>   | 0.39846  | 1.85212  | 1.12529  | 0.1695   | 1.61402  | 0.89176  |
| <i>SrSmFeMg-0.875-0.125-0.5-0.5</i>     | -0.57149 | 0.69924  | 0.06388  | -0.77076 | 0.48082  | -0.14497 |
| <i>SrSmFeMg-0.875-0.125-0.625-0.375</i> | 0.38963  | -0.51696 | -0.06366 | 0.13407  | -0.7737  | -0.31981 |
| <i>SrSmFeMg-0.875-0.125-0.75-0.25</i>   | 0.51168  | -0.76868 | -0.1285  | 0.26865  | -0.91905 | -0.3252  |
| <i>SrSmFeMg-0.875-0.125-0.875-0.125</i> | 0.5867   | 0.3953   | 0.491    | 0.33577  | 0.19833  | 0.26705  |
| <i>SrSmFeMn-0.25-0.75-0.375-0.625</i>   | 0.87033  | 2.5453   | 1.70782  | 0.49285  | 2.21848  | 1.35566  |
| <i>SrSmFeMn-0.25-0.75-0.5-0.5</i>       | -0.0161  | 3.48032  | 1.73211  | -0.2846  | 3.14519  | 1.43029  |
| <i>SrSmFeMn-0.25-0.75-0.875-0.125</i>   | 0.51777  | 1.27215  | 0.89496  | 0.31694  | 0.91721  | 0.61707  |
| <i>SrSmFeMn-0.375-0.625-0.5-0.5</i>     | 0.74358  | 3.04228  | 1.89293  | 0.38992  | 2.76047  | 1.5752   |
| <i>SrSmFeMn-0.625-0.375-0.375-0.625</i> | 0.61622  | 2.24392  | 1.43007  | 0.24767  | 1.92075  | 1.08421  |
| <i>SrSmFeMn-0.625-0.375-0.625-0.375</i> | 0.76627  | 2.48812  | 1.62719  | 0.25884  | 2.38366  | 1.32125  |
| <i>SrSmFeMn-0.625-0.375-0.75-0.25</i>   | 1.75814  | 0.72245  | 1.24029  | 1.5249   | 0.17528  | 0.85009  |
| <i>SrSmFeMn-0.75-0.25-0.375-0.625</i>   | 1.12541  | 0.92389  | 1.02465  | 0.85955  | 0.60571  | 0.73263  |
| <i>SrSmFeMn-0.75-0.25-0.5-0.5</i>       | 0.62868  | 1.98197  | 1.30532  | 0.30308  | 1.8385   | 1.07079  |
| <i>SrSmFeMn-0.75-0.25-0.625-0.375</i>   | 0.71712  | 1.71162  | 1.21437  | 0.44435  | 1.39462  | 0.91949  |
| <i>SrSmFeMn-0.75-0.25-0.875-0.125</i>   | 1.588    | 0.7574   | 1.1727   | 1.44894  | 0.41995  | 0.93444  |
| <i>SrSmFeMn-0.875-0.125-0.125-0.875</i> | 0.75679  | 0.41871  | 0.58775  | 0.47011  | -0.01786 | 0.22612  |
| <i>SrSmFeMn-0.875-0.125-0.25-0.75</i>   | 0.8034   | 1.00556  | 0.90448  | 0.52669  | 0.68937  | 0.60803  |
| <i>SrSmFeMn-0.875-0.125-0.375-0.625</i> | 0.27183  | 0.95196  | 0.61189  | -0.04322 | 0.63008  | 0.29343  |
| <i>SrSmFeMn-0.875-0.125-0.5-0.5</i>     | 0.84654  | 0.83248  | 0.83951  | 0.53025  | 0.57821  | 0.55423  |
| <i>SrSmFeMn-0.875-0.125-0.625-0.375</i> | 0.13408  | 1.01999  | 0.57704  | -0.12101 | 0.72998  | 0.30449  |
| <i>SrSmFeMn-0.875-0.125-0.75-0.25</i>   | 1.41602  | 0.92189  | 1.16895  | 1.26946  | 0.52377  | 0.89662  |
| <i>SrSmFeMn-0.875-0.125-0.875-0.125</i> | 1.68866  | -0.22846 | 0.7301   | 1.371    | -0.32504 | 0.52298  |
| <i>SrSmFeNi-0.125-0.875-0.375-0.625</i> | 1.8514   | 0.70628  | 1.27884  | 1.51578  | 0.21887  | 0.86733  |
| <i>SrSmFeNi-0.25-0.75-0.125-0.875</i>   | -0.49082 | 1.6146   | 0.56189  | -0.826   | 1.28476  | 0.22938  |
| <i>SrSmFeNi-0.25-0.75-0.25-0.75</i>     | -1.10299 | 2.49734  | 0.69718  | -1.46383 | 2.22561  | 0.38089  |
| <i>SrSmFeNi-0.25-0.75-0.5-0.5</i>       | 0.89838  | 1.6955   | 1.29694  | 0.65814  | 1.355    | 1.00657  |
| <i>SrSmFeNi-0.25-0.75-0.625-0.375</i>   | 0.14263  | 1.85016  | 0.99639  | -0.06959 | 1.46715  | 0.69878  |
| <i>SrSmFeNi-0.375-0.625-0.125-0.875</i> | 0.44469  | 0.90115  | 0.67292  | 0.18869  | 0.53691  | 0.3628   |
| <i>SrSmFeNi-0.375-0.625-0.25-0.75</i>   | 0.68055  | 1.19558  | 0.93807  | 0.33745  | 0.90781  | 0.62263  |
| <i>SrSmFeNi-0.375-0.625-0.375-0.625</i> | -0.51641 | 2.32436  | 0.90398  | -0.8282  | 1.98674  | 0.57927  |

|                                         |          |          |          |          |          |          |
|-----------------------------------------|----------|----------|----------|----------|----------|----------|
| <i>SrSmFeNi-0.375-0.625-0.625-0.375</i> | 0.32492  | 2.74456  | 1.53474  | 0.04837  | 2.4281   | 1.23824  |
| <i>SrSmFeNi-0.375-0.625-0.75-0.25</i>   | 0.5302   | 3.0123   | 1.77125  | 0.24801  | 2.65044  | 1.44922  |
| <i>SrSmFeNi-0.5-0.5-0.125-0.875</i>     | 0.27836  | 0.43454  | 0.35645  | -0.00732 | 0.09084  | 0.04176  |
| <i>SrSmFeNi-0.5-0.5-0.25-0.75</i>       | 1.06846  | 0.4435   | 0.75598  | 0.75675  | 0.15582  | 0.45629  |
| <i>SrSmFeNi-0.5-0.5-0.375-0.625</i>     | 0.38287  | 0.90255  | 0.64271  | 0.05599  | 0.56787  | 0.31193  |
| <i>SrSmFeNi-0.5-0.5-0.625-0.375</i>     | 1.90725  | 0.63696  | 1.27211  | 1.60224  | 0.47592  | 1.03908  |
| <i>SrSmFeNi-0.5-0.5-0.75-0.25</i>       | 0.98314  | 0.34706  | 0.6651   | 0.62789  | 0.14095  | 0.38442  |
| <i>SrSmFeNi-0.625-0.375-0.125-0.875</i> | -0.06501 | 0.39975  | 0.16737  | -0.32706 | 0.0632   | -0.13193 |
| <i>SrSmFeNi-0.625-0.375-0.25-0.75</i>   | 0.37448  | 0.46016  | 0.41732  | 0.06535  | 0.17652  | 0.12094  |
| <i>SrSmFeNi-0.625-0.375-0.375-0.625</i> | -0.0737  | 0.26492  | 0.09561  | -0.35097 | -0.08417 | -0.21757 |
| <i>SrSmFeNi-0.625-0.375-0.5-0.5</i>     | 0.63427  | 0.53245  | 0.58336  | 0.35096  | 0.23714  | 0.29405  |
| <i>SrSmFeNi-0.625-0.375-0.625-0.375</i> | 0.91782  | 0.59283  | 0.75533  | 0.65354  | 0.26034  | 0.45694  |
| <i>SrSmFeNi-0.625-0.375-0.75-0.25</i>   | 1.20152  | 0.82297  | 1.01225  | 0.92529  | 0.46572  | 0.69551  |
| <i>SrSmFeNi-0.625-0.375-0.875-0.125</i> | 2.43166  | 0.91232  | 1.67199  | 2.15511  | 0.57168  | 1.36339  |
| <i>SrSmFeNi-0.75-0.25-0.125-0.875</i>   | -0.23314 | -0.08933 | -0.16123 | -0.3533  | -0.35964 | -0.35647 |
| <i>SrSmFeNi-0.75-0.25-0.25-0.75</i>     | -0.3209  | 0.58839  | 0.13374  | -0.42515 | 0.31131  | -0.05692 |
| <i>SrSmFeNi-0.75-0.25-0.375-0.625</i>   | -0.19044 | 0.18411  | -0.00317 | -0.41438 | -0.11897 | -0.26668 |
| <i>SrSmFeNi-0.75-0.25-0.5-0.5</i>       | 0.00187  | 0.77526  | 0.38856  | -0.19934 | 0.49492  | 0.14779  |
| <i>SrSmFeNi-0.75-0.25-0.625-0.375</i>   | -0.00929 | 0.98741  | 0.48906  | -0.27618 | 0.5712   | 0.14751  |
| <i>SrSmFeNi-0.75-0.25-0.75-0.25</i>     | -0.25454 | 0.89755  | 0.32151  | -0.40792 | 0.69193  | 0.14201  |
| <i>SrSmFeNi-0.75-0.25-0.875-0.125</i>   | 0.84763  | 1.0688   | 0.95821  | 0.68686  | 0.77431  | 0.73058  |
| <i>SrSmFeNi-0.875-0.125-0.125-0.875</i> | -0.04678 | -0.28713 | -0.16696 | -0.29869 | -0.63173 | -0.46521 |
| <i>SrSmFeNi-0.875-0.125-0.375-0.625</i> | -0.18298 | -0.10275 | -0.14286 | -0.42404 | -0.42002 | -0.42203 |
| <i>SrSmFeNi-0.875-0.125-0.5-0.5</i>     | -0.2844  | 0.57668  | 0.14614  | -0.56379 | 0.28109  | -0.14135 |
| <i>SrSmFeNi-0.875-0.125-0.625-0.375</i> | -0.33027 | 1.23304  | 0.45138  | -0.63054 | 0.98222  | 0.17584  |
| <i>SrSmFeNi-0.875-0.125-0.75-0.25</i>   | 0.73152  | 0.0953   | 0.41341  | 0.44677  | -0.16913 | 0.13882  |
| <i>SrSmFeNi-0.875-0.125-0.875-0.125</i> | 0.94281  | -0.10457 | 0.41912  | 0.69053  | -0.40015 | 0.14519  |
| <i>SrSmFeTi-0.25-0.75-0.875-0.125</i>   | 0.7709   | 2.75249  | 1.7617   | 0.43175  | 2.39217  | 1.41196  |
| <i>SrSmFeTi-0.875-0.125-0.625-0.375</i> | 0.61599  | 2.78178  | 1.69888  | 0.25576  | 2.56193  | 1.40884  |
| <i>SrSmFeTi-0.875-0.125-0.875-0.125</i> | 0.91538  | 0.96514  | 0.94026  | 0.57979  | 0.6218   | 0.6008   |
| <i>SrSmMn-0.125-0.875-1</i>             | 5.63427  | 0.97512  | 3.3047   | 5.24772  | 0.65991  | 2.95381  |
| <i>SrSmMn-0.25-0.75-1</i>               | 0.77593  | 2.47038  | 1.62316  | 0.45019  | 2.05154  | 1.25087  |
| <i>SrSmMn-0.75-0.25-1</i>               | 0.89474  | 1.65373  | 1.27423  | 0.56505  | 1.31434  | 0.93969  |
| <i>SrSmMn-0.875-0.125-1</i>             | 1.02876  | 0.45564  | 0.7422   | 0.6581   | 0.18837  | 0.42324  |
| <i>SrSmNi-0.125-0.875-1</i>             | 3.94057  | -2.45582 | 0.74237  | 3.71898  | -2.89673 | 0.41113  |
| <i>SrSmNi-0.25-0.75-1</i>               | -0.33796 | 0.74248  | 0.20226  | -0.60641 | 0.41069  | -0.09786 |
| <i>SrSmNi-0.375-0.625-1</i>             | 0.89251  | 0.10335  | 0.49793  | 0.61551  | -0.30381 | 0.15585  |
| <i>SrSmNi-0.5-0.5-1</i>                 | 0.70872  | -0.10018 | 0.30427  | 0.47104  | -0.38703 | 0.042    |
| <i>SrSmNi-0.625-0.375-1</i>             | 0.45082  | 0.22704  | 0.33893  | 0.28953  | -0.06989 | 0.10982  |
| <i>SrSmNi-0.75-0.25-1</i>               | -0.63601 | 0.03909  | -0.29846 | -0.8401  | -0.18219 | -0.51114 |
| <i>SrSmNi-0.875-0.125-1</i>             | 0.11311  | -0.03773 | 0.03769  | -0.03462 | -0.29919 | -0.16691 |
| <i>SrYCo-0.25-0.75-1</i>                | -0.10118 | 2.43337  | 1.1661   | -0.22693 | 2.05896  | 0.91601  |

|                                        |          |          |          |          |          |          |
|----------------------------------------|----------|----------|----------|----------|----------|----------|
| <i>SrYCo-0.375-0.625-1</i>             | 0.49601  | 1.73544  | 1.11572  | 0.1188   | 1.37106  | 0.74493  |
| <i>SrYCo-0.5-0.5-1</i>                 | 1.63727  | 0.61818  | 1.12772  | 1.41178  | 0.30935  | 0.86056  |
| <i>SrYCo-0.625-0.375-1</i>             | 0.06823  | 1.96452  | 1.01638  | -0.26477 | 1.54538  | 0.64031  |
| <i>SrYCo-0.75-0.25-1</i>               | -0.66368 | 1.65859  | 0.49745  | -0.83685 | 1.32064  | 0.2419   |
| <i>SrYCo-0.875-0.125-1</i>             | 0.39391  | 0.09703  | 0.24547  | 0.11647  | -0.21155 | -0.04754 |
| <i>SrYCu-0.125-0.875-1</i>             | 1.66257  | -1.74285 | -0.04014 | 1.46154  | -2.14768 | -0.34307 |
| <i>SrYCu-0.25-0.75-1</i>               | -0.35216 | 1.66958  | 0.65871  | -0.6304  | 1.21703  | 0.29331  |
| <i>SrYCu-0.375-0.625-1</i>             | 0.09808  | -1.48261 | -0.69226 | -0.26289 | -1.96976 | -1.11633 |
| <i>SrYCu-0.5-0.5-1</i>                 | 0.39419  | -1.86323 | -0.73452 | 0.01674  | -2.00293 | -0.9931  |
| <i>SrYCu-0.625-0.375-1</i>             | -0.7599  | 0.02173  | -0.36908 | -1.13611 | -0.25139 | -0.69375 |
| <i>SrYCu-0.75-0.25-1</i>               | -0.17232 | -0.25124 | -0.21178 | -0.23574 | -0.5407  | -0.38822 |
| <i>SrYCu-0.875-0.125-1</i>             | 1.11015  | -1.12277 | -0.00631 | 0.78159  | -1.64404 | -0.43123 |
| <i>SrYFe-0.125-0.875-1</i>             | 4.28084  | 0.86753  | 2.57419  | 3.95369  | 0.52002  | 2.23685  |
| <i>SrYFe-0.25-0.75-1</i>               | 0.85357  | 2.05615  | 1.45486  | 0.58242  | 1.65648  | 1.11945  |
| <i>SrYFe-0.875-0.125-1</i>             | 2.25815  | -0.33168 | 0.96323  | 1.92396  | -0.63198 | 0.64599  |
| <i>SrYFeCo-0.125-0.875-0.75-0.25</i>   | 2.68074  | 0.88747  | 1.78411  | 2.33596  | 0.48965  | 1.4128   |
| <i>SrYFeCo-0.25-0.75-0.125-0.875</i>   | -0.94764 | 2.02575  | 0.53905  | -1.19062 | 1.71507  | 0.26223  |
| <i>SrYFeCo-0.25-0.75-0.25-0.75</i>     | 0.00243  | 1.16476  | 0.58359  | -0.21951 | 0.86741  | 0.32395  |
| <i>SrYFeCo-0.25-0.75-0.375-0.625</i>   | -1.20372 | 2.82059  | 0.80844  | -1.39836 | 2.50217  | 0.5519   |
| <i>SrYFeCo-0.25-0.75-0.5-0.5</i>       | 0.17307  | 3.28395  | 1.72851  | 0.0347   | 2.92248  | 1.47859  |
| <i>SrYFeCo-0.25-0.75-0.625-0.375</i>   | 0.27134  | 2.54582  | 1.40858  | -0.03891 | 2.26622  | 1.11365  |
| <i>SrYFeCo-0.25-0.75-0.75-0.25</i>     | 0.2857   | 2.61823  | 1.45196  | 0.08313  | 2.22513  | 1.15413  |
| <i>SrYFeCo-0.25-0.75-0.875-0.125</i>   | 0.79468  | 2.73477  | 1.76472  | 0.51398  | 2.4643   | 1.48914  |
| <i>SrYFeCo-0.375-0.625-0.25-0.75</i>   | 0.91081  | 3.17702  | 2.04391  | 0.62773  | 2.87383  | 1.75078  |
| <i>SrYFeCo-0.375-0.625-0.875-0.125</i> | 1.09015  | 3.75804  | 2.4241   | 0.63145  | 3.65919  | 2.14532  |
| <i>SrYFeCo-0.5-0.5-0.125-0.875</i>     | -0.09952 | 2.29746  | 1.09897  | -0.69323 | 2.09391  | 0.70034  |
| <i>SrYFeCo-0.5-0.5-0.25-0.75</i>       | 0.59175  | 1.43917  | 1.01546  | 0.27973  | 1.07179  | 0.67576  |
| <i>SrYFeCo-0.5-0.5-0.375-0.625</i>     | 1.3503   | 0.47616  | 0.91323  | 1.10563  | 0.11721  | 0.61142  |
| <i>SrYFeCo-0.5-0.5-0.75-0.25</i>       | 1.63091  | 0.58954  | 1.11023  | 1.27095  | 0.25669  | 0.76382  |
| <i>SrYFeCo-0.5-0.5-0.875-0.125</i>     | 1.95176  | 0.99568  | 1.47372  | 1.68451  | 0.63379  | 1.15915  |
| <i>SrYFeCo-0.625-0.375-0.125-0.875</i> | 0.35652  | 1.21157  | 0.78404  | -0.03845 | 0.91903  | 0.44029  |
| <i>SrYFeCo-0.625-0.375-0.25-0.75</i>   | 0.2956   | 2.1431   | 1.21935  | -0.06381 | 1.89739  | 0.91679  |
| <i>SrYFeCo-0.625-0.375-0.5-0.5</i>     | 2.29173  | 0.52125  | 1.40649  | 2.01033  | 0.09564  | 1.05298  |
| <i>SrYFeCo-0.625-0.375-0.625-0.375</i> | 1.32524  | 0.21907  | 0.77215  | 1.02741  | -0.25017 | 0.38862  |
| <i>SrYFeCo-0.625-0.375-0.875-0.125</i> | 1.00966  | 1.89839  | 1.45402  | 0.65026  | 1.51522  | 1.08274  |
| <i>SrYFeCo-0.75-0.25-0.125-0.875</i>   | 0.49145  | 0.40729  | 0.44937  | 0.33644  | 0.13717  | 0.23681  |
| <i>SrYFeCo-0.75-0.25-0.25-0.75</i>     | -0.67337 | 1.95216  | 0.6394   | -0.90516 | 1.66351  | 0.37918  |
| <i>SrYFeCo-0.75-0.25-0.375-0.625</i>   | -0.36324 | 1.24172  | 0.43924  | -0.6978  | 1.12252  | 0.21236  |
| <i>SrYFeCo-0.75-0.25-0.5-0.5</i>       | 1.09834  | 0.03675  | 0.56755  | 0.8732   | -0.45219 | 0.21051  |
| <i>SrYFeCo-0.75-0.25-0.625-0.375</i>   | -0.21369 | 0.75266  | 0.26949  | -0.42505 | 0.47194  | 0.02344  |
| <i>SrYFeCo-0.75-0.25-0.75-0.25</i>     | 0.16398  | 0.82939  | 0.49668  | -0.02563 | 0.43717  | 0.20577  |
| <i>SrYFeCo-0.75-0.25-0.875-0.125</i>   | 1.43717  | -0.40458 | 0.5163   | 1.48163  | -0.7556  | 0.36301  |
| <i>SrYFeCo-0.875-0.125-0.125-0.875</i> | 0.72911  | 0.19033  | 0.45972  | 0.4159   | -0.09358 | 0.16116  |
| <i>SrYFeCo-0.875-0.125-0.25-0.75</i>   | -0.02366 | 0.12001  | 0.04818  | -0.33204 | -0.33318 | -0.33261 |
| <i>SrYFeCo-0.875-0.125-0.375-0.625</i> | 0.06645  | 0.94681  | 0.50663  | -0.21578 | 0.64178  | 0.213    |
| <i>SrYFeCo-0.875-0.125-0.5-0.5</i>     | 0.44953  | -0.60109 | -0.07578 | 0.17002  | -0.87117 | -0.35058 |
| <i>SrYFeCo-0.875-0.125-0.625-0.375</i> | 0.3893   | 0.84724  | 0.61827  | 0.1512   | 0.48236  | 0.31678  |
| <i>SrYFeCo-0.875-0.125-0.75-0.25</i>   | 0.89019  | 1.27929  | 1.08474  | 0.65366  | 0.98459  | 0.81913  |

|                                        |          |          |          |          |          |          |
|----------------------------------------|----------|----------|----------|----------|----------|----------|
| <i>SrYFeCo-0.875-0.125-0.875-0.125</i> | 1.65156  | -0.03664 | 0.80746  | 1.45258  | -0.35936 | 0.54661  |
| <i>SrYFeCu-0.125-0.875-0.125-0.875</i> | 1.10012  | 0.94333  | 1.02172  | 0.84194  | 0.52191  | 0.68193  |
| <i>SrYFeCu-0.125-0.875-0.25-0.75</i>   | 0.42042  | 2.03579  | 1.22811  | -0.10086 | 1.82847  | 0.86381  |
| <i>SrYFeCu-0.125-0.875-0.375-0.625</i> | 1.35608  | 0.99008  | 1.17308  | 1.02185  | 0.65798  | 0.83991  |
| <i>SrYFeCu-0.25-0.75-0.25-0.75</i>     | -1.37572 | 1.54321  | 0.08374  | -1.63174 | 1.19288  | -0.21943 |
| <i>SrYFeCu-0.25-0.75-0.375-0.625</i>   | -1.36868 | 2.33063  | 0.48097  | -1.62515 | 2.02097  | 0.19791  |
| <i>SrYFeCu-0.25-0.75-0.5-0.5</i>       | -1.03075 | 1.43308  | 0.20117  | -1.2911  | 1.10672  | -0.09219 |
| <i>SrYFeCu-0.25-0.75-0.625-0.375</i>   | 0.58993  | 1.52635  | 1.05814  | 0.22645  | 1.19026  | 0.70836  |
| <i>SrYFeCu-0.25-0.75-0.875-0.125</i>   | 0.29228  | 1.66074  | 0.97651  | -0.04546 | 1.31161  | 0.63307  |
| <i>SrYFeCu-0.375-0.625-0.125-0.875</i> | -0.73667 | 1.62227  | 0.4428   | -0.96401 | 1.2639   | 0.14995  |
| <i>SrYFeCu-0.375-0.625-0.25-0.75</i>   | 0.42498  | 0.65125  | 0.53812  | 0.07741  | 0.35064  | 0.21403  |
| <i>SrYFeCu-0.375-0.625-0.375-0.625</i> | 0.02932  | 2.07678  | 1.05305  | -0.32797 | 1.7547   | 0.71336  |
| <i>SrYFeCu-0.375-0.625-0.5-0.5</i>     | 0.9261   | 1.16603  | 1.04606  | 0.59022  | 0.8202   | 0.70521  |
| <i>SrYFeCu-0.375-0.625-0.75-0.25</i>   | 0.8576   | 2.74148  | 1.79954  | 0.51881  | 2.3541   | 1.43646  |
| <i>SrYFeCu-0.5-0.5-0.125-0.875</i>     | -0.16855 | 1.08943  | 0.46044  | -0.49066 | 0.76753  | 0.13844  |
| <i>SrYFeCu-0.5-0.5-0.25-0.75</i>       | 0.36559  | -0.30384 | 0.03088  | 0.11359  | -0.64581 | -0.26611 |
| <i>SrYFeCu-0.5-0.5-0.375-0.625</i>     | -0.24843 | 0.83422  | 0.29289  | -0.635   | 0.61714  | -0.00893 |
| <i>SrYFeCu-0.5-0.5-0.5-0.5</i>         | 1.859    | 0.95571  | 1.40736  | 1.51621  | 0.6476   | 1.08191  |
| <i>SrYFeCu-0.5-0.5-0.625-0.375</i>     | 0.62094  | 0.98877  | 0.80486  | 0.29488  | 0.70661  | 0.50075  |
| <i>SrYFeCu-0.5-0.5-0.75-0.25</i>       | 0.4198   | 2.61683  | 1.51832  | -0.00524 | 2.52881  | 1.26178  |
| <i>SrYFeCu-0.625-0.375-0.125-0.875</i> | -0.305   | 0.18419  | -0.06041 | -0.6074  | -0.12681 | -0.3671  |
| <i>SrYFeCu-0.625-0.375-0.25-0.75</i>   | 0.03569  | -0.42527 | -0.19479 | -0.2459  | -0.69625 | -0.47108 |
| <i>SrYFeCu-0.625-0.375-0.375-0.625</i> | 0.31318  | 0.05232  | 0.18275  | 0.05726  | -0.24538 | -0.09406 |
| <i>SrYFeCu-0.625-0.375-0.5-0.5</i>     | -0.32521 | 1.54569  | 0.61024  | -0.69648 | 1.3398   | 0.32166  |
| <i>SrYFeCu-0.625-0.375-0.625-0.375</i> | -0.5763  | 1.51364  | 0.46867  | -0.82017 | 1.09994  | 0.13989  |
| <i>SrYFeCu-0.625-0.375-0.75-0.25</i>   | 0.00373  | 1.167    | 0.58536  | -0.3044  | 0.59754  | 0.14657  |
| <i>SrYFeCu-0.625-0.375-0.875-0.125</i> | 1.81084  | 0.72733  | 1.26908  | 1.50104  | 0.33756  | 0.9193   |
| <i>SrYFeCu-0.75-0.25-0.25-0.75</i>     | -0.34853 | 0.30441  | -0.02206 | -0.43751 | -0.0741  | -0.2558  |
| <i>SrYFeCu-0.75-0.25-0.375-0.625</i>   | -0.62026 | 1.08128  | 0.23051  | -0.82794 | 0.79919  | -0.01437 |
| <i>SrYFeCu-0.75-0.25-0.5-0.5</i>       | -0.05097 | -0.28764 | -0.1693  | -0.32315 | -0.55296 | -0.43806 |
| <i>SrYFeCu-0.75-0.25-0.625-0.375</i>   | 0.09593  | -0.63824 | -0.27115 | -0.07012 | -0.89215 | -0.48113 |
| <i>SrYFeCu-0.75-0.25-0.75-0.25</i>     | -0.02711 | 0.85014  | 0.41151  | -0.30445 | 0.64917  | 0.17236  |
| <i>SrYFeCu-0.875-0.125-0.125-0.875</i> | 0.18683  | -0.47174 | -0.14245 | -0.09798 | -0.90583 | -0.5019  |
| <i>SrYFeCu-0.875-0.125-0.25-0.75</i>   | -0.5333  | -0.08856 | -0.31093 | -0.67993 | -0.56893 | -0.62443 |
| <i>SrYFeCu-0.875-0.125-0.375-0.625</i> | -0.8739  | 0.12958  | -0.37216 | -1.23676 | -0.09738 | -0.66707 |
| <i>SrYFeCu-0.875-0.125-0.5-0.5</i>     | -0.64283 | 0.66011  | 0.00864  | -0.95536 | 0.30484  | -0.32526 |
| <i>SrYFeCu-0.875-0.125-0.625-0.375</i> | -0.00149 | 0.08865  | 0.04358  | -0.23295 | -0.15456 | -0.19376 |
| <i>SrYFeCu-0.875-0.125-0.75-0.25</i>   | 0.64832  | -0.18376 | 0.23228  | 0.36131  | -0.56511 | -0.1019  |
| <i>SrYFeCu-0.875-0.125-0.875-0.125</i> | 0.98869  | 0.11689  | 0.55279  | 0.71868  | -0.19435 | 0.26216  |
| <i>SrYFeMg-0.125-0.875-0.125-0.875</i> | 0.10147  | -0.67714 | -0.28783 | -0.05621 | -0.93951 | -0.49786 |
| <i>SrYFeMg-0.125-0.875-0.25-0.75</i>   | -0.14791 | 1.34541  | 0.59875  | -0.32675 | 1.05694  | 0.3651   |
| <i>SrYFeMg-0.25-0.75-0.125-0.875</i>   | -1.92557 | 0.09041  | -0.91758 | -2.24614 | 0.05161  | -1.09726 |
| <i>SrYFeMg-0.25-0.75-0.25-0.75</i>     | -1.23998 | 0.19193  | -0.52403 | -1.38661 | -0.03791 | -0.71226 |
| <i>SrYFeMg-0.25-0.75-0.375-0.625</i>   | -0.6915  | 0.99955  | 0.15402  | -0.93519 | 0.66348  | -0.13585 |
| <i>SrYFeMg-0.25-0.75-0.5-0.5</i>       | 0.13757  | 1.61466  | 0.87612  | 0.02678  | 1.33265  | 0.67971  |
| <i>SrYFeMg-0.25-0.75-0.625-0.375</i>   | 0.55275  | 0.87387  | 0.71331  | 0.55196  | 0.23735  | 0.39465  |
| <i>SrYFeMg-0.25-0.75-0.75-0.25</i>     | -0.24942 | 2.11106  | 0.93082  | -0.49191 | 1.78683  | 0.64746  |
| <i>SrYFeMg-0.25-0.75-0.875-0.125</i>   | -0.89162 | 2.53201  | 0.82019  | -1.08334 | 2.21507  | 0.56586  |



|                                        |          |          |          |          |          |          |
|----------------------------------------|----------|----------|----------|----------|----------|----------|
| <i>SrYFeMg-0.375-0.625-0.25-0.75</i>   | -1.36616 | 0.63468  | -0.36574 | -1.59929 | 0.3118   | -0.64374 |
| <i>SrYFeMg-0.375-0.625-0.375-0.625</i> | 0.10435  | 1.41993  | 0.76214  | -0.08497 | 1.20872  | 0.56187  |
| <i>SrYFeMg-0.375-0.625-0.5-0.5</i>     | 1.20243  | -0.06206 | 0.57018  | 0.96819  | -0.33506 | 0.31656  |
| <i>SrYFeMg-0.375-0.625-0.625-0.375</i> | 0.63253  | 2.74099  | 1.68676  | 0.35456  | 2.38942  | 1.37199  |
| <i>SrYFeMg-0.5-0.5-0.25-0.75</i>       | 0.20857  | -0.56843 | -0.17993 | -0.07505 | -0.75942 | -0.41724 |
| <i>SrYFeMg-0.5-0.5-0.375-0.625</i>     | -0.71147 | 1.58409  | 0.43631  | -0.95005 | 1.3819   | 0.21592  |
| <i>SrYFeMg-0.5-0.5-0.5-0.5</i>         | -0.81478 | 1.08706  | 0.13614  | -1.03798 | 0.82077  | -0.10861 |
| <i>SrYFeMg-0.625-0.375-0.375-0.625</i> | -1.17403 | 1.3629   | 0.09443  | -1.3944  | 1.17239  | -0.111   |
| <i>SrYFeMg-0.625-0.375-0.5-0.5</i>     | 0.15946  | -0.16182 | -0.00118 | -0.03549 | -0.41013 | -0.22281 |
| <i>SrYFeMg-0.625-0.375-0.625-0.375</i> | -0.41491 | 0.62044  | 0.10276  | -0.71497 | 0.37752  | -0.16872 |
| <i>SrYFeMg-0.625-0.375-0.75-0.25</i>   | -0.07561 | 1.09199  | 0.50819  | -0.38138 | 0.85713  | 0.23787  |
| <i>SrYFeMg-0.75-0.25-0.375-0.625</i>   | -1.6015  | 1.26001  | -0.17074 | -1.83162 | 1.11178  | -0.35992 |
| <i>SrYFeMg-0.75-0.25-0.5-0.5</i>       | -1.18053 | 0.7872   | -0.19667 | -1.41639 | 0.56526  | -0.42556 |
| <i>SrYFeMg-0.75-0.25-0.625-0.375</i>   | 0.76706  | 0.61057  | 0.68882  | 0.64747  | 0.16071  | 0.40409  |
| <i>SrYFeMg-0.75-0.25-0.75-0.25</i>     | 0.69847  | 0.71796  | 0.70821  | 0.48418  | 0.53435  | 0.50926  |
| <i>SrYFeMg-0.75-0.25-0.875-0.125</i>   | 0.543    | 1.27382  | 0.90841  | 0.30346  | 1.05515  | 0.6793   |
| <i>SrYFeMg-0.875-0.125-0.5-0.5</i>     | 0.10827  | -0.12551 | -0.00862 | -0.02122 | -0.38991 | -0.20557 |
| <i>SrYFeMg-0.875-0.125-0.625-0.375</i> | 0.48233  | -0.54086 | -0.02927 | 0.23633  | -0.89351 | -0.32859 |
| <i>SrYFeMg-0.875-0.125-0.75-0.25</i>   | 0.56012  | 0.7212   | 0.64066  | 0.32712  | 0.52456  | 0.42584  |
| <i>SrYFeMg-0.875-0.125-0.875-0.125</i> | 0.52154  | 0.34521  | 0.43337  | 0.25489  | -0.00302 | 0.12593  |
| <i>SrYFeMn-0.25-0.75-0.375-0.625</i>   | 1.0727   | 1.37051  | 1.2216   | 0.66298  | 1.03533  | 0.84916  |
| <i>SrYFeMn-0.25-0.75-0.5-0.5</i>       | 0.80893  | 1.29501  | 1.05197  | 0.52849  | 0.98099  | 0.75474  |
| <i>SrYFeMn-0.25-0.75-0.625-0.375</i>   | 0.14344  | 0.88382  | 0.51363  | 0.03263  | 0.55311  | 0.29287  |
| <i>SrYFeMn-0.25-0.75-0.75-0.25</i>     | -0.68713 | 1.49807  | 0.40547  | -0.93402 | 1.0995   | 0.08274  |
| <i>SrYFeMn-0.25-0.75-0.875-0.125</i>   | -1.22764 | 2.30728  | 0.53982  | -1.55061 | 1.96575  | 0.20757  |
| <i>SrYFeMn-0.625-0.375-0.75-0.25</i>   | 0.5104   | 3.0593   | 1.78485  | 0.20095  | 2.71105  | 1.456    |
| <i>SrYFeMn-0.75-0.25-0.125-0.875</i>   | 0.53848  | 1.61208  | 1.07528  | 0.30908  | 1.2426   | 0.77584  |
| <i>SrYFeMn-0.75-0.25-0.375-0.625</i>   | 1.22022  | 0.86083  | 1.04052  | 1.05089  | 0.51624  | 0.78357  |
| <i>SrYFeMn-0.75-0.25-0.5-0.5</i>       | 1.52322  | 0.88306  | 1.20314  | 1.29008  | 0.56689  | 0.92848  |
| <i>SrYFeMn-0.75-0.25-0.625-0.375</i>   | 0.67897  | 1.78724  | 1.2331   | 0.31455  | 1.53186  | 0.9232   |
| <i>SrYFeMn-0.75-0.25-0.75-0.25</i>     | -0.09911 | 2.41926  | 1.16008  | -0.34872 | 2.08482  | 0.86805  |
| <i>SrYFeMn-0.875-0.125-0.125-0.875</i> | 0.43326  | 1.16341  | 0.79833  | 0.06007  | 0.86406  | 0.46207  |
| <i>SrYFeMn-0.875-0.125-0.25-0.75</i>   | 0.73915  | 1.09662  | 0.91789  | 0.42774  | 0.77989  | 0.60382  |
| <i>SrYFeMn-0.875-0.125-0.375-0.625</i> | 0.48371  | 1.15068  | 0.81719  | 0.20229  | 0.86579  | 0.53404  |
| <i>SrYFeMn-0.875-0.125-0.5-0.5</i>     | 0.38987  | 1.93316  | 1.16152  | 0.13656  | 1.55956  | 0.84806  |
| <i>SrYFeMn-0.875-0.125-0.625-0.375</i> | 0.7208   | 0.47244  | 0.59662  | 0.46118  | 0.08532  | 0.27325  |
| <i>SrYFeMn-0.875-0.125-0.75-0.25</i>   | 0.70338  | 1.14583  | 0.92461  | 0.47926  | 0.85912  | 0.66919  |
| <i>SrYFeMn-0.875-0.125-0.875-0.125</i> | 1.94152  | 0.22544  | 1.08348  | 1.70781  | 0.00692  | 0.85736  |
| <i>SrYFeNi-0.125-0.875-0.125-0.875</i> | 2.66015  | 0.57235  | 1.61625  | 2.29384  | 0.29118  | 1.29251  |
| <i>SrYFeNi-0.125-0.875-0.625-0.375</i> | 0.90382  | 3.93247  | 2.41814  | 0.64857  | 3.56142  | 2.10499  |
| <i>SrYFeNi-0.25-0.75-0.125-0.875</i>   | -0.56826 | 0.42815  | -0.07006 | -0.6696  | 0.03416  | -0.31772 |
| <i>SrYFeNi-0.25-0.75-0.25-0.75</i>     | -1.22707 | 2.02915  | 0.40104  | -1.51416 | 1.72484  | 0.10534  |



|                                        |          |          |          |          |          |          |
|----------------------------------------|----------|----------|----------|----------|----------|----------|
| <i>SrYFeNi-0.25-0.75-0.875-0.125</i>   | 0.27963  | 1.47944  | 0.87953  | 0.10929  | 1.1977   | 0.6535   |
| <i>SrYFeNi-0.375-0.625-0.125-0.875</i> | 1.93107  | 0.49975  | 1.21541  | 1.59946  | 0.14515  | 0.8723   |
| <i>SrYFeNi-0.375-0.625-0.25-0.75</i>   | 0.14291  | 1.96817  | 1.05554  | -0.23152 | 1.65372  | 0.7111   |
| <i>SrYFeNi-0.375-0.625-0.375-0.625</i> | 1.32464  | 0.83171  | 1.07817  | 0.97091  | 0.4938   | 0.73235  |
| <i>SrYFeNi-0.5-0.5-0.125-0.875</i>     | 0.47709  | 0.33722  | 0.40716  | 0.16031  | 0.01549  | 0.0879   |
| <i>SrYFeNi-0.5-0.5-0.25-0.75</i>       | 0.63744  | 0.26708  | 0.45226  | 0.36098  | -0.05237 | 0.1543   |
| <i>SrYFeNi-0.5-0.5-0.375-0.625</i>     | 0.90867  | 0.8743   | 0.89148  | 0.61917  | 0.55257  | 0.58587  |
| <i>SrYFeNi-0.5-0.5-0.625-0.375</i>     | 0.55903  | 2.58391  | 1.57147  | 0.26148  | 2.23775  | 1.24961  |
| <i>SrYFeNi-0.5-0.5-0.75-0.25</i>       | 1.37932  | 0.30788  | 0.8436   | 1.12539  | 0.01987  | 0.57263  |
| <i>SrYFeNi-0.625-0.375-0.125-0.875</i> | 0.0528   | 0.06152  | 0.05716  | -0.20313 | -0.29621 | -0.24967 |
| <i>SrYFeNi-0.625-0.375-0.25-0.75</i>   | -0.21951 | 0.25467  | 0.01758  | -0.45086 | -0.10525 | -0.27805 |
| <i>SrYFeNi-0.625-0.375-0.375-0.625</i> | -0.35422 | 1.08482  | 0.3653   | -0.7018  | 0.83486  | 0.06653  |
| <i>SrYFeNi-0.625-0.375-0.5-0.5</i>     | 0.04514  | 0.48971  | 0.26742  | -0.30885 | 0.246    | -0.03142 |
| <i>SrYFeNi-0.625-0.375-0.625-0.375</i> | -0.1983  | 1.09361  | 0.44765  | -0.44281 | 0.70537  | 0.13128  |
| <i>SrYFeNi-0.625-0.375-0.75-0.25</i>   | 0.99602  | 0.28275  | 0.63938  | 0.64909  | 0.01602  | 0.33256  |
| <i>SrYFeNi-0.625-0.375-0.875-0.125</i> | 1.95236  | 1.01073  | 1.48155  | 1.66785  | 0.63023  | 1.14904  |
| <i>SrYFeNi-0.75-0.25-0.25-0.75</i>     | -0.65166 | 0.51784  | -0.06691 | -0.806   | 0.22656  | -0.28972 |
| <i>SrYFeNi-0.75-0.25-0.375-0.625</i>   | -1.14742 | 0.66579  | -0.24081 | -1.36184 | 0.3341   | -0.51387 |
| <i>SrYFeNi-0.75-0.25-0.5-0.5</i>       | -0.12368 | -0.37868 | -0.25118 | -0.36818 | -0.63305 | -0.50061 |
| <i>SrYFeNi-0.75-0.25-0.625-0.375</i>   | -0.98133 | 2.0636   | 0.54114  | -1.23022 | 1.78438  | 0.27708  |
| <i>SrYFeNi-0.75-0.25-0.75-0.25</i>     | 0.01124  | 1.29539  | 0.65332  | -0.21863 | 1.04329  | 0.41233  |
| <i>SrYFeNi-0.75-0.25-0.875-0.125</i>   | 1.60081  | 0.4698   | 1.03531  | 1.36354  | 0.24996  | 0.80675  |
| <i>SrYFeNi-0.875-0.125-0.125-0.875</i> | -0.23994 | -0.61118 | -0.42556 | -0.53748 | -0.99103 | -0.76425 |
| <i>SrYFeNi-0.875-0.125-0.25-0.75</i>   | -0.46777 | 0.32163  | -0.07307 | -0.69172 | -0.04036 | -0.36604 |
| <i>SrYFeNi-0.875-0.125-0.375-0.625</i> | -0.33858 | -0.12586 | -0.23222 | -0.61371 | -0.39345 | -0.50358 |
| <i>SrYFeNi-0.875-0.125-0.5-0.5</i>     | -0.22334 | 0.45318  | 0.11492  | -0.40102 | 0.00683  | -0.19709 |
| <i>SrYFeNi-0.875-0.125-0.625-0.375</i> | 0.5804   | 0.41389  | 0.49715  | 0.36216  | 0.12503  | 0.2436   |
| <i>SrYFeNi-0.875-0.125-0.75-0.25</i>   | 0.48233  | 0.35114  | 0.41673  | 0.18164  | 0.10616  | 0.1439   |
| <i>SrYFeNi-0.875-0.125-0.875-0.125</i> | 1.16309  | -0.05043 | 0.55633  | 0.99823  | -0.23239 | 0.38292  |
| <i>SrYFeTi-0.25-0.75-0.875-0.125</i>   | 0.41197  | 3.33869  | 1.87533  | 0.24321  | 3.00105  | 1.62213  |
| <i>SrYFeTi-0.75-0.25-0.75-0.25</i>     | 0.18049  | 3.0323   | 1.6064   | -0.05919 | 2.75555  | 1.34818  |
| <i>SrYFeTi-0.875-0.125-0.875-0.125</i> | 1.87585  | 0.48642  | 1.18113  | 1.68359  | 0.22219  | 0.95289  |
| <i>SrYMn-0.125-0.875-1</i>             | 6.2071   | 0.57468  | 3.39089  | 5.83429  | 0.27473  | 3.05451  |
| <i>SrYMn-0.25-0.75-1</i>               | -0.00284 | 3.36113  | 1.67914  | -0.35246 | 3.03637  | 1.34196  |
| <i>SrYMn-0.75-0.25-1</i>               | 0.58792  | 1.34653  | 0.96722  | 0.25989  | 1.03466  | 0.64728  |
| <i>SrYMn-0.875-0.125-1</i>             | 0.55214  | 0.90674  | 0.72944  | 0.21757  | 0.68197  | 0.44977  |
| <i>SrYNi-0.25-0.75-1</i>               | -2.32552 | 1.97654  | -0.17449 | -2.50859 | 1.69099  | -0.4088  |
| <i>SrYNi-0.375-0.625-1</i>             | 0.76767  | 0.51787  | 0.64277  | 0.47328  | 0.21357  | 0.34342  |
| <i>SrYNi-0.5-0.5-1</i>                 | 0.11067  | 0.19557  | 0.15312  | -0.13807 | -0.14526 | -0.14166 |
| <i>SrYNi-0.625-0.375-1</i>             | -0.80781 | 0.52639  | -0.14071 | -1.04443 | 0.27987  | -0.38228 |
| <i>SrYNi-0.875-0.125-1</i>             | 0.20762  | -1.33064 | -0.56151 | -0.14442 | -1.46391 | -0.80416 |
| <i>YCu-1-1</i>                         | 0.14993  | -0.44775 | -0.14891 | -0.18672 | -0.80262 | -0.49467 |
| <i>YFe-1-1</i>                         | -0.88613 | -0.00942 | -0.44777 | -1.31557 | -0.31837 | -0.81697 |
| <i>YFeCo-1-0.125-0.875</i>             | -1.34422 | 3.23764  | 0.94671  | -1.5004  | 2.84327  | 0.67143  |
| <i>YFeCo-1-0.375-0.625</i>             | -0.13318 | 1.79266  | 0.82974  | -0.28251 | 1.40501  | 0.56125  |
| <i>YFeCo-1-0.5-0.5</i>                 | -0.55478 | 2.061    | 0.75311  | -0.82144 | 1.67695  | 0.42776  |
| <i>YFeCo-1-0.625-0.375</i>             | -0.43663 | 2.06086  | 0.81212  | -0.7705  | 1.7067   | 0.4681   |
| <i>YFeCu-1-0.25-0.75</i>               | -2.07512 | 2.1616   | 0.04324  | -2.44364 | 1.87841  | -0.28261 |

|                            |          |          |         |          |          |          |
|----------------------------|----------|----------|---------|----------|----------|----------|
| <i>YFeCu-1-0.375-0.625</i> | -0.02069 | 1.69243  | 0.83587 | -0.36588 | 1.25651  | 0.44532  |
| <i>YFeCu-1-0.5-0.5</i>     | 0.60597  | 1.60913  | 1.10755 | 0.40303  | 1.14136  | 0.7722   |
| <i>YFeCu-1-0.625-0.375</i> | 0.01318  | 2.46959  | 1.24138 | -0.34257 | 2.38854  | 1.02299  |
| <i>YFeCu-1-0.75-0.25</i>   | -1.00302 | 2.53347  | 0.76522 | -1.26049 | 2.21048  | 0.47499  |
| <i>YFeCu-1-0.875-0.125</i> | -1.03267 | 2.66841  | 0.81787 | -1.4168  | 2.1799   | 0.38155  |
| <i>YFeMg-1-0.125-0.875</i> | -2.33779 | 0.00698  | -1.1654 | -2.47034 | -0.27942 | -1.37488 |
| <i>YFeMg-1-0.25-0.75</i>   | -1.88238 | 1.98793  | 0.05278 | -2.13239 | 1.64592  | -0.24324 |
| <i>YFeMg-1-0.875-0.125</i> | -0.24915 | 3.45709  | 1.60397 | -0.50894 | 3.1451   | 1.31808  |
| <i>YFeMn-1-0.125-0.875</i> | 0.11107  | 3.46848  | 1.78977 | -0.16715 | 3.06965  | 1.45125  |
| <i>YFeMn-1-0.25-0.75</i>   | 0.79693  | 2.84977  | 1.82335 | 0.54913  | 2.45584  | 1.50249  |
| <i>YFeMn-1-0.625-0.375</i> | -0.67143 | 2.59145  | 0.96001 | -0.8999  | 2.08503  | 0.59256  |
| <i>YFeNi-1-0.125-0.875</i> | -0.32013 | 0.85733  | 0.2686  | -0.61993 | 0.52834  | -0.04579 |
| <i>YFeNi-1-0.25-0.75</i>   | -1.79961 | 3.26698  | 0.73369 | -2.03799 | 3.03711  | 0.49956  |
| <i>YFeNi-1-0.75-0.25</i>   | -1.11335 | 2.2689   | 0.57777 | -1.26818 | 1.8799   | 0.30586  |
| <i>YFeTi-1-0.5-0.5</i>     | 0.37769  | 5.03899  | 2.70834 | 0.24117  | 4.78575  | 2.51346  |
| <i>YFeTi-1-0.75-0.25</i>   | -0.17937 | 3.96273  | 1.89168 | -0.35355 | 3.65343  | 1.64994  |
| <i>YMn-1-1</i>             | 2.2455   | -1.31347 | 0.46601 | 1.97755  | -1.79937 | 0.08909  |
| <i>YTi-1-1</i>             | 0.47202  | 2.0298   | 1.25091 | -0.03912 | 1.80845  | 0.88467  |

**Table S5.** 113 promising candidates screened by the overlapping of DFT computed  $\Delta G_{0.25 \rightarrow 0.375}$ ,  $\Delta G_{0.375 \rightarrow 0.5}$ , and  $\Delta G_{0.3125 \rightarrow 0.4375}$  for CLAS at 400 and 700 °C.

| $\Delta G$ (eV)                         | T = 400 °C |            |           | T = 700 °C    |            |           |               |
|-----------------------------------------|------------|------------|-----------|---------------|------------|-----------|---------------|
|                                         | $\delta$   | 0.25-0.375 | 0.375-0.5 | 0.3125-0.4375 | 0.25-0.375 | 0.375-0.5 | 0.3125-0.4375 |
| <i>BaFeCo-1-0.875-0.125</i>             |            | 0.48271    | 0.33693   | 0.40982       | -0.03574   | 0.28383   | 0.12405       |
| <i>BaFeTi-1-0.875-0.125</i>             |            | 0.5933     | 0.36382   | 0.47856       | 0.49613    | 0.08819   | 0.29216       |
| <i>CaFeCo-1-0.5-0.5</i>                 |            | 0.08972    | 0.56377   | 0.32674       | -0.03696   | 0.33952   | 0.15128       |
| <i>CaFeMn-1-0.625-0.375</i>             |            | 0.50979    | 0.4605    | 0.48514       | 0.30081    | 0.15275   | 0.22678       |
| <i>LaCu-1-1</i>                         |            | 0.58164    | 0.3715    | 0.47657       | 0.07186    | 0.07078   | 0.07132       |
| <i>SrBaFe-0.125-0.875-1</i>             |            | 0.53478    | 0.10298   | 0.31888       | 0.28772    | -0.17794  | 0.05489       |
| <i>SrBaFeCo-0.125-0.875-0.375-0.625</i> |            | 0.14835    | 0.0959    | 0.12213       | -0.19153   | -0.17867  | -0.1851       |
| <i>SrBaFeCo-0.25-0.75-0.625-0.375</i>   |            | 0.38635    | 0.32112   | 0.35373       | 0.23514    | 0.00333   | 0.11923       |
| <i>SrBaFeCo-0.5-0.5-0.5-0.5</i>         |            | 0.30449    | 0.59474   | 0.44961       | 0.09269    | 0.2085    | 0.15059       |
| <i>SrBaFeCo-0.625-0.375-0.5-0.5</i>     |            | 0.03721    | 0.13755   | 0.08738       | -0.18969   | -0.17432  | -0.182        |
| <i>SrBaFeCo-0.75-0.25-0.5-0.5</i>       |            | 0.23642    | 0.27035   | 0.25339       | 0.02808    | -0.11008  | -0.041        |
| <i>SrBaFeCo-0.75-0.25-0.75-0.25</i>     |            | 0.28408    | 0.16514   | 0.22461       | 0.05287    | -0.16683  | -0.05698      |
| <i>SrBaFeCo-0.875-0.125-0.375-0.625</i> |            | 0.16511    | 0.52432   | 0.34472       | -0.05709   | 0.26353   | 0.10322       |
| <i>SrBaFeCo-0.875-0.125-0.5-0.5</i>     |            | 0.05355    | 0.12663   | 0.09009       | -0.21381   | -0.00867  | -0.11124      |
| <i>SrBaFeCu-0.5-0.5-0.75-0.25</i>       |            | 0.11351    | 0.19492   | 0.15422       | -0.17456   | -0.10925  | -0.1419       |
| <i>SrBaFeMg-0.375-0.625-0.5-0.5</i>     |            | -0.01091   | 0.34401   | 0.16655       | -0.10427   | 0.11638   | 0.00606       |
| <i>SrBaFeMg-0.375-0.625-0.875-0.125</i> |            | 0.16771    | 0.07822   | 0.12296       | -0.05453   | -0.11482  | -0.08467      |
| <i>SrBaFeMg-0.75-0.25-0.75-0.25</i>     |            | -0.09957   | 0.45867   | 0.17955       | -0.13136   | 0.19618   | 0.03241       |
| <i>SrBaFeMg-0.875-0.125-0.75-0.25</i>   |            | 0.18231    | -0.06099  | 0.06066       | -0.10135   | -0.20737  | -0.15436      |
| <i>SrBaFeMn-0.125-0.875-0.75-0.25</i>   |            | 0.21511    | 0.52965   | 0.37238       | -0.00363   | 0.24004   | 0.11821       |
| <i>SrBaFeMn-0.25-0.75-0.5-0.5</i>       |            | 0.37246    | 0.3374    | 0.35493       | 0.18143    | 0.08588   | 0.13366       |

|                                          |          |         |         |           |          |           |
|------------------------------------------|----------|---------|---------|-----------|----------|-----------|
| <i>SrBaFeMn-0.375-0.625-0.25-0.75</i>    | 0.01613  | 0.25094 | 0.13354 | -0.20936  | -0.06259 | -0.13598  |
| <i>SrBaFeMn-0.5-0.5-0.75-0.25</i>        | 0.17028  | 0.2868  | 0.22854 | -0.07792  | 0.12363  | 0.02285   |
| <i>SrBaFeMn-0.625-0.375-0.5-0.5</i>      | 0.0704   | 0.24001 | 0.15521 | -0.20419  | 0.05717  | -0.07351  |
| <i>SrBaFeMn-0.75-0.25-0.25-0.75</i>      | 0.22292  | 0.58233 | 0.40263 | 0.01588   | 0.18357  | 0.09972   |
| <i>SrBaFeMn-0.75-0.25-0.75-0.25</i>      | 0.57074  | 0.49875 | 0.53474 | 0.405     | 0.22733  | 0.31616   |
| <i>SrBaFeMn-0.875-0.125-0.125-0.875</i>  | 0.34797  | 0.17679 | 0.26238 | 0.08093   | -0.06899 | 0.00597   |
| <i>SrBaFeMn-0.875-0.125-0.375-0.625</i>  | 0.17094  | 0.40018 | 0.28556 | -0.05548  | 0.15608  | 0.0503    |
| <i>SrBaFeMn-0.875-0.125-0.5-0.5</i>      | 0.0472   | 0.38986 | 0.21853 | -0.21607  | 0.16122  | -0.02743  |
| <i>SrBaFeNi-0.125-0.875-0.875-0.125</i>  | -0.0962  | 0.19215 | 0.04798 | -0.22659  | -0.0426  | -0.1346   |
| <i>SrBaFeNi-0.375-0.625-0.625-0.375</i>  | 0.16963  | 0.35434 | 0.26199 | -0.09042  | 0.18209  | 0.04584   |
| <i>SrBaFeNi-0.5-0.5-0.75-0.25</i>        | 0.08683  | 0.05129 | 0.06906 | -0.18171  | -0.2099  | -0.19581  |
| <i>SrBaFeNi-0.875-0.125-0.75-0.25</i>    | 0.28202  | 0.35396 | 0.31799 | 0.00711   | 0.1003   | 0.0537    |
| <i>SrCaCo-0.75-0.25-1</i>                | 0.19103  | 0.40577 | 0.2984  | -6.57E-04 | -0.00444 | -0.00255  |
| <i>SrCaFe-0.875-0.125-1</i>              | 0.57668  | 0.57066 | 0.57367 | 0.33086   | 0.34956  | 0.34021   |
| <i>SrCaFeCo-0.125-0.875-0.25-0.75</i>    | 0.05621  | 0.5843  | 0.32026 | -0.22208  | 0.35893  | 0.06842   |
| <i>SrCaFeCo-0.375-0.625-0.125-0.875</i>  | 0.07644  | 0.60242 | 0.33943 | -0.16904  | 0.2367   | 0.03383   |
| <i>SrCaFeCo-0.625-0.375-0.75-0.25</i>    | 0.56823  | 0.41351 | 0.49087 | 0.3065    | 0.21367  | 0.26009   |
| <i>SrCaFeCo-0.75-0.25-0.375-0.625</i>    | 0.06354  | 0.51569 | 0.28961 | -0.03607  | 0.03434  | -8.66E-04 |
| <i>SrCaFeCo-0.75-0.25-0.5-0.5</i>        | 0.09002  | 0.36471 | 0.22736 | -0.06313  | 0.07222  | 0.00455   |
| <i>SrCaFeCo-0.875-0.125-0.375-0.625</i>  | 0.14885  | 0.42105 | 0.28495 | -0.01168  | 0.11173  | 0.05002   |
| <i>SrCaFeCo-0.875-0.125-0.625-0.375</i>  | 0.2067   | 0.44884 | 0.32777 | -0.09003  | 0.07789  | -0.00607  |
| <i>SrCaFeCo-0.875-0.125-0.75-0.25</i>    | 0.29804  | 0.5948  | 0.44642 | 0.01324   | 0.29377  | 0.15351   |
| <i>SrCaFeCu-0.5-0.5-0.75-0.25</i>        | 0.1229   | 0.2283  | 0.1756  | -0.16621  | -0.0796  | -0.1229   |
| <i>SrCaFeCu-0.625-0.375-0.75-0.25</i>    | 0.10208  | 0.26519 | 0.18363 | -0.21872  | 0.00503  | -0.10685  |
| <i>SrCaFeMg-0.125-0.875-0.875-0.125</i>  | 0.34851  | 0.61895 | 0.48373 | 0.13317   | 0.43354  | 0.28336   |
| <i>SrCaFeMg-0.375-0.625-0.875-0.125</i>  | 0.08192  | 0.44763 | 0.26478 | -0.16645  | 0.07125  | -0.0476   |
| <i>SrCaFeMg-0.625-0.375-0.875-0.125</i>  | 0.30938  | 0.34544 | 0.32741 | 0.08771   | 0.07317  | 0.08044   |
| <i>SrCaFeMg-0.875-0.125-0.625-0.375*</i> | 0.14483  | 0.28894 | 0.21689 | -0.07514  | 0.03269  | -0.02122  |
| <i>SrCaFeMn-0.375-0.625-0.625-0.375</i>  | 0.37453  | 0.23396 | 0.30424 | 0.05294   | -0.05668 | -0.00187  |
| <i>SrCaFeMn-0.625-0.375-0.25-0.75</i>    | 0.40468  | 0.24711 | 0.3259  | 0.04259   | -0.15028 | -0.05384  |
| <i>SrCaFeMn-0.625-0.375-0.75-0.25</i>    | 0.10572  | 0.5147  | 0.31021 | -0.10615  | 0.08098  | -0.01258  |
| <i>SrCaFeMn-0.75-0.25-0.25-0.75</i>      | 0.00385  | 0.34819 | 0.17602 | -0.21444  | 0.02792  | -0.09326  |
| <i>SrCaFeMn-0.75-0.25-0.75-0.25</i>      | 0.53013  | 0.3619  | 0.44602 | 0.42755   | 0.02462  | 0.22609   |
| <i>SrCaFeMn-0.875-0.125-0.25-0.75</i>    | 0.35706  | 0.52131 | 0.43919 | 0.03505   | 0.27756  | 0.15631   |
| <i>SrCaFeMn-0.875-0.125-0.375-0.625</i>  | 0.2352   | 0.56394 | 0.39957 | -0.01947  | 0.34458  | 0.16255   |
| <i>SrCaFeNi-0.125-0.875-0.25-0.75</i>    | 0.06578  | 0.18893 | 0.12736 | -0.05503  | -0.21339 | -0.13421  |
| <i>SrCaFeNi-0.25-0.75-0.75-0.25</i>      | -0.01217 | 0.10001 | 0.04392 | -0.10069  | -0.15425 | -0.12747  |
| <i>SrCaFeNi-0.625-0.375-0.625-0.375</i>  | 0.11689  | 0.2378  | 0.17734 | -0.04446  | -0.19482 | -0.11964  |
| <i>SrCaMn-0.5-0.5-1</i>                  | 0.24631  | 0.17118 | 0.20874 | -0.04433  | -0.1354  | -0.08987  |
| <i>SrCaMn-0.875-0.125-1</i>              | 0.26709  | 0.12885 | 0.19797 | -0.11171  | -0.16091 | -0.13631  |

|                                         |         |         |         |          |          |          |
|-----------------------------------------|---------|---------|---------|----------|----------|----------|
| <i>SrFeCo-1-0.375-0.625</i>             | 0.12955 | 0.41986 | 0.27471 | -0.11361 | 0.15769  | 0.02204  |
| <i>SrFeCo-1-0.625-0.375</i>             | 0.19303 | 0.41837 | 0.3057  | 0.07862  | 0.114    | 0.09631  |
| <i>SrFeCu-1-0.75-0.25</i>               | 0.30731 | 0.41729 | 0.3623  | 0.07264  | 0.10923  | 0.09093  |
| <i>SrFeMn-1-0.25-0.75</i>               | 0.13157 | 0.28482 | 0.2082  | -0.16554 | 0.03328  | -0.06613 |
| <i>SrFeMn-1-0.375-0.625</i>             | 0.00106 | 0.05198 | 0.02652 | -0.20494 | -0.21165 | -0.20829 |
| <i>SrFeMn-1-0.5-0.5</i>                 | 0.52152 | 0.21742 | 0.36947 | 0.29186  | -0.02942 | 0.13122  |
| <i>SrFeMn-1-0.625-0.375</i>             | 0.51378 | 0.15933 | 0.33655 | 0.35306  | -0.04384 | 0.15461  |
| <i>SrKCo-0.875-0.125-1</i>              | 0.32613 | 0.09959 | 0.21286 | 0.10637  | -0.14991 | -0.02177 |
| <i>SrKFe-0.625-0.375-1</i>              | 0.27688 | 0.12352 | 0.2002  | 0.01242  | -0.15055 | -0.06906 |
| <i>SrKFe-0.875-0.125-1</i>              | 0.4351  | 0.57842 | 0.50676 | 0.17555  | 0.22575  | 0.20065  |
| <i>SrKFeCo-0.875-0.125-0.75-0.25</i>    | 0.44088 | 0.46146 | 0.45117 | 0.20654  | 0.14667  | 0.17661  |
| <i>SrKFeMg-0.875-0.125-0.625-0.375</i>  | 0.0851  | -0.0433 | 0.0209  | -0.20243 | -0.21451 | -0.20847 |
| <i>SrKFeMn-0.875-0.125-0.375-0.625</i>  | 0.10576 | 0.35482 | 0.23029 | -0.10413 | 0.09299  | -0.00557 |
| <i>SrKFeMn-0.875-0.125-0.75-0.25</i>    | 0.2193  | 0.27336 | 0.24633 | -0.10859 | -0.02782 | -0.0682  |
| <i>SrLaCo-0.75-0.25-1</i>               | 0.56372 | 0.49102 | 0.52737 | 0.31562  | 0.36582  | 0.34072  |
| <i>SrLaCu-0.625-0.375-1</i>             | 0.05413 | 0.24897 | 0.15155 | -0.22745 | -0.08991 | -0.15868 |
| <i>SrLaFeCo-0.875-0.125-0.125-0.875</i> | 0.42866 | 0.48005 | 0.45436 | 0.10681  | 0.24468  | 0.17575  |
| <i>SrLaFeCo-0.875-0.125-0.25-0.75</i>   | 0.17304 | 0.49265 | 0.33284 | -0.10557 | 0.09846  | -0.00355 |
| <i>SrLaFeCo-0.875-0.125-0.5-0.5</i>     | 0.56692 | 0.54863 | 0.55777 | 0.34608  | 0.09996  | 0.22302  |
| <i>SrLaFeCu-0.5-0.5-0.25-0.75</i>       | 0.31725 | 0.12518 | 0.22122 | 0.02344  | -0.17733 | -0.07695 |
| <i>SrLaFeCu-0.625-0.375-0.625-0.375</i> | 0.56318 | 0.15869 | 0.36094 | 0.28582  | -0.07373 | 0.10604  |
| <i>SrLaFeCu-0.75-0.25-0.625-0.375</i>   | 0.40215 | 0.32947 | 0.36581 | 0.18322  | -0.03735 | 0.07293  |
| <i>SrLaFeCu-0.875-0.125-0.75-0.25</i>   | 0.38722 | 0.25224 | 0.31973 | 0.12097  | -0.07601 | 0.02248  |
| <i>SrLaFeMg-0.25-0.75-0.375-0.625</i>   | 0.11726 | 0.56336 | 0.34031 | -0.091   | 0.26861  | 0.08881  |
| <i>SrLaFeMg-0.875-0.125-0.75-0.25</i>   | 0.08061 | 0.52183 | 0.30122 | -0.13506 | 0.25454  | 0.05974  |
| <i>SrLaFeMg-0.875-0.125-0.875-0.125</i> | 0.39941 | 0.58209 | 0.49075 | 0.15359  | 0.29215  | 0.22287  |
| <i>SrLaFeMn-0.875-0.125-0.125-0.875</i> | 0.62728 | 0.58765 | 0.60747 | 0.31092  | 0.20223  | 0.25657  |
| <i>SrLaFeNi-0.375-0.625-0.125-0.875</i> | 0.61531 | 0.34358 | 0.47944 | 0.36103  | -0.08201 | 0.13951  |
| <i>SrLaFeNi-0.5-0.5-0.125-0.875</i>     | 0.18316 | 0.52621 | 0.35469 | -0.08688 | 0.14479  | 0.02895  |
| <i>SrLaFeNi-0.5-0.5-0.25-0.75</i>       | 0.36177 | 0.25559 | 0.30868 | 0.06507  | -0.18237 | -0.05865 |
| <i>SrLaFeNi-0.625-0.375-0.375-0.625</i> | 0.48636 | 0.4003  | 0.44333 | 0.18895  | -0.02978 | 0.07958  |
| <i>SrLaFeNi-0.625-0.375-0.625-0.375</i> | 0.5621  | 0.39105 | 0.47657 | 0.2683   | 0.0213   | 0.1448   |
| <i>SrLaFeNi-0.875-0.125-0.625-0.375</i> | 0.19229 | 0.60972 | 0.401   | -0.10601 | 0.11205  | 0.00302  |
| <i>SrLaFeNi-0.875-0.125-0.75-0.25</i>   | 0.29413 | 0.47088 | 0.3825  | 0.0507   | 0.09388  | 0.07229  |
| <i>SrLaMn-0.875-0.125-1</i>             | 0.48708 | 0.55239 | 0.51973 | 0.13338  | 0.14077  | 0.13708  |
| <i>SrLaNi-0.375-0.625-1</i>             | 0.09556 | 0.29927 | 0.19741 | -0.15627 | -0.20972 | -0.183   |
| <i>SrSmFeCo-0.75-0.25-0.125-0.875</i>   | 0.52625 | 0.39269 | 0.45947 | 0.28067  | 0.02112  | 0.1509   |
| <i>SrSmFeCu-0.5-0.5-0.5-0.5</i>         | 0.61119 | 0.58763 | 0.59941 | 0.24668  | 0.28835  | 0.26751  |
| <i>SrSmFeCu-0.625-0.375-0.25-0.75</i>   | 0.10814 | 0.48144 | 0.29479 | -0.19438 | 0.13206  | -0.03116 |
| <i>SrSmFeCu-0.625-0.375-0.375-0.625</i> | 0.09208 | 0.0648  | 0.07844 | -0.20991 | -0.22447 | -0.21719 |
| <i>SrSmFeCu-0.75-0.25-0.5-0.5</i>       | 0.0751  | 0.59838 | 0.33674 | -0.14225 | 0.20816  | 0.03295  |
| <i>SrSmFeMg-0.875-0.125-0.875-0.125</i> | 0.5867  | 0.3953  | 0.491   | 0.33577  | 0.19833  | 0.26705  |
| <i>SrSmFeNi-0.5-0.5-0.125-0.875</i>     | 0.27836 | 0.43454 | 0.35645 | -0.00732 | 0.09084  | 0.04176  |

|                                        |         |         |         |          |          |          |
|----------------------------------------|---------|---------|---------|----------|----------|----------|
| <i>SrSmFeNi-0.625-0.375-0.25-0.75</i>  | 0.37448 | 0.46016 | 0.41732 | 0.06535  | 0.17652  | 0.12094  |
| <i>SrSmNi-0.625-0.375-1</i>            | 0.45082 | 0.22704 | 0.33893 | 0.28953  | -0.06989 | 0.10982  |
| <i>SrYCo-0.875-0.125-1</i>             | 0.39391 | 0.09703 | 0.24547 | 0.11647  | -0.21155 | -0.04754 |
| <i>SrYFeCo-0.75-0.25-0.125-0.875</i>   | 0.49145 | 0.40729 | 0.44937 | 0.33644  | 0.13717  | 0.23681  |
| <i>SrYFeMg-0.875-0.125-0.875-0.125</i> | 0.52154 | 0.34521 | 0.43337 | 0.25489  | -0.00302 | 0.12593  |
| <i>SrYFeNi-0.5-0.5-0.125-0.875</i>     | 0.47709 | 0.33722 | 0.40716 | 0.16031  | 0.01549  | 0.0879   |
| <i>SrYFeNi-0.875-0.125-0.625-0.375</i> | 0.5804  | 0.41389 | 0.49715 | 0.36216  | 0.12503  | 0.2436   |
| <i>SrYFeNi-0.875-0.125-0.75-0.25</i>   | 0.48233 | 0.35114 | 0.41673 | 0.18164  | 0.10616  | 0.1439   |
| <i>SrYNi-0.5-0.5-1</i>                 | 0.11067 | 0.19557 | 0.15312 | -0.13807 | -0.14526 | -0.14166 |

**Table S6.** Experimental verification of three additional high-entropy perovskites.

|                                                                                                                 | Oxygen environment | Oxygen capacity | Recovery | Initial temperature |
|-----------------------------------------------------------------------------------------------------------------|--------------------|-----------------|----------|---------------------|
| <i>Sr<sub>0.875</sub>Ca<sub>0.125</sub>Fe<sub>0.75</sub>Co<sub>0.125</sub>Ni<sub>0.125</sub>O<sub>3-δ</sub></i> | 50%                | 4.05%           | 98.03%   | 319                 |
|                                                                                                                 | 5%                 | 3.36%           | 98.71%   | 316                 |
| <i>Sr<sub>0.875</sub>La<sub>0.125</sub>Fe<sub>0.75</sub>Co<sub>0.125</sub>Ni<sub>0.125</sub>O<sub>3-δ</sub></i> | 50%                | 3.28%           | 97.05%   | 312                 |
|                                                                                                                 | 5%                 | 3.61%           | 98.84%   | 266                 |
| <i>Sr<sub>0.875</sub>Sm<sub>0.125</sub>Fe<sub>0.75</sub>Co<sub>0.125</sub>Ni<sub>0.125</sub>O<sub>3-δ</sub></i> | 50%                | 4.45%           | 97.74%   | 265                 |
|                                                                                                                 | 5%                 | 3.31%           | 98.87%   | 264                 |

**Table S7.** 482 promising candidates screened by the DFT computed  $\Delta G_{0.25 \rightarrow 0.375}$ ,  $\Delta G_{0.375 \rightarrow 0.5}$ , or  $\Delta G_{0.3125 \rightarrow 0.4375}$  for CL H<sub>2</sub>O/CO<sub>2</sub> splitting at 800 or 950 °C. As long as one of these  $\Delta G$ s is within the target range, the corresponding material is considered as promising.

| $\Delta G$ (eV)             | T = 800 °C |            |           | T = 950 °C    |            |           |               |
|-----------------------------|------------|------------|-----------|---------------|------------|-----------|---------------|
|                             | $\delta$   | 0.25-0.375 | 0.375-0.5 | 0.3125-0.4375 | 0.25-0.375 | 0.375-0.5 | 0.3125-0.4375 |
| <i>BaFe-1-1</i>             |            | 2.62141    | -0.41565  | 1.10288       | 2.53887    | -0.52163  | 1.00862       |
| <i>BaFeTi-1-0.125-0.875</i> |            | 3.8555     | 1.3284    | 2.59195       | 3.71914    | 1.15483   | 2.43698       |
| <i>BaFeTi-1-0.25-0.75</i>   |            | 1.94144    | 4.14668   | 3.04406       | 1.71899    | 4.09476   | 2.90687       |
| <i>BaFeTi-1-0.75-0.25</i>   |            | 0.17366    | 2.82313   | 1.4984        | 0.02726    | 2.71658   | 1.37192       |
| <i>BaTi-1-1</i>             |            | 3.17488    | 2.87361   | 3.02425       | 3.00111    | 2.66226   | 2.83169       |
| <i>CaFeCo-1-0.75-0.25</i>   |            | -1.32072   | 1.79193   | 0.2356        | -1.51768   | 1.9894    | 0.23586       |
| <i>CaFeTi-1-0.375-0.625</i> |            | 1.57036    | 2.55637   | 2.06336       | 1.41885    | 2.40376   | 1.9113        |
| <i>CaFeTi-1-0.5-0.5</i>     |            | 1.25409    | 2.12743   | 1.69076       | 1.16998    | 1.95319   | 1.56158       |
| <i>CaFeTi-1-0.625-0.375</i> |            | 1.26168    | 2.32055   | 1.79111       | 1.18863    | 2.16912   | 1.67887       |
| <i>LaCo-1-1</i>             |            | -0.06769   | 2.86782   | 1.40006       | -0.259     | 2.74898   | 1.24499       |
| <i>LaFe-1-1</i>             |            | 1.83126    | 0.67777   | 1.25452       | 1.84057    | 0.30724   | 1.07391       |
| <i>LaFeCo-1-0.125-0.875</i> |            | 2.1394     | 1.45116   | 1.79528       | 2.03095    | 1.22124   | 1.6261        |
| <i>LaFeCo-1-0.25-0.75</i>   |            | 1.87337    | 2.35343   | 2.1134        | 1.80217    | 2.15328   | 1.97772       |
| <i>LaFeCo-1-0.375-0.625</i> |            | 2.55252    | 0.49061   | 1.52157       | 2.43564    | 0.29893   | 1.36729       |
| <i>LaFeCo-1-0.5-0.5</i>     |            | 2.01803    | 1.46021   | 1.73912       | 1.87493    | 1.25951   | 1.56722       |
| <i>LaFeCo-1-0.625-0.375</i> |            | 1.72397    | 2.21784   | 1.9709        | 1.62212    | 2.01816   | 1.82014       |
| <i>LaFeCo-1-0.75-0.25</i>   |            | 1.97852    | 3.66405   | 2.82129       | 1.84801    | 3.55773   | 2.70287       |
| <i>LaFeCo-1-0.875-0.125</i> |            | 2.60878    | 1.17978   | 1.89428       | 2.54495    | 0.98654   | 1.76575       |
| <i>LaFeCu-1-0.25-0.75</i>   |            | -0.10425   | 2.37085   | 1.1333        | -0.21621   | 2.18719   | 0.98549       |
| <i>LaFeCu-1-0.5-0.5</i>     |            | 1.01401    | 2.0337    | 1.52385       | 0.9017     | 1.83445   | 1.36807       |
| <i>LaFeMg-1-0.125-0.875</i> |            | -0.90927   | 2.56509   | 0.82791       | -0.98443   | 2.41393   | 0.71475       |
| <i>LaFeMg-1-0.5-0.5</i>     |            | 1.55043    | 2.66197   | 2.1062        | 1.41973    | 2.52361   | 1.97167       |
| <i>LaFeMg-1-0.75-0.25</i>   |            | 1.98445    | 0.95194   | 1.4682        | 1.93757    | 0.78738   | 1.36248       |



|                                     |          |         |         |          |         |         |
|-------------------------------------|----------|---------|---------|----------|---------|---------|
| <i>LaFeMg-1-0.875-0.125</i>         | 2.45832  | 2.382   | 2.42016 | 2.32419  | 2.21876 | 2.27147 |
| <i>LaFeMn-1-0.125-0.875</i>         | 3.49613  | 2.66265 | 3.07939 | 3.36403  | 2.49725 | 2.93064 |
| <i>LaFeMn-1-0.25-0.75</i>           | 2.04806  | 3.89049 | 2.96928 | 1.90243  | 3.78562 | 2.84402 |
| <i>LaFeMn-1-0.375-0.625</i>         | 2.38581  | 2.6456  | 2.5157  | 2.31299  | 2.45227 | 2.38263 |
| <i>LaFeMn-1-0.5-0.5</i>             | 1.13101  | 3.07411 | 2.10256 | 0.99942  | 2.91989 | 1.95966 |
| <i>LaFeMn-1-0.625-0.375</i>         | 2.05536  | 2.34986 | 2.20261 | 2.02352  | 2.1869  | 2.10521 |
| <i>LaFeMn-1-0.75-0.25</i>           | 1.67613  | 3.28004 | 2.47808 | 1.58394  | 3.1242  | 2.35407 |
| <i>LaFeMn-1-0.875-0.125</i>         | 3.04372  | 2.38517 | 2.71444 | 3.04498  | 2.12989 | 2.58744 |
| <i>LaFeNi-1-0.125-0.875</i>         | 0.45153  | 2.26411 | 1.35782 | 0.33617  | 2.10358 | 1.21988 |
| <i>LaFeNi-1-0.25-0.75</i>           | -0.11215 | 2.59552 | 1.24169 | -0.20032 | 2.44952 | 1.1246  |
| <i>LaFeNi-1-0.5-0.5</i>             | 1.19241  | 2.2773  | 1.73486 | 1.08678  | 2.09435 | 1.59057 |
| <i>LaFeNi-1-0.625-0.375</i>         | 1.75362  | 2.38349 | 2.06856 | 1.68081  | 2.21328 | 1.94705 |
| <i>LaFeNi-1-0.75-0.25</i>           | 1.51534  | 2.03586 | 1.7756  | 1.39607  | 1.86429 | 1.63018 |
| <i>LaFeTi-1-0.125-0.875</i>         | 2.75011  | 5.56675 | 4.15843 | 2.63347  | 5.40658 | 4.02003 |
| <i>LaFeTi-1-0.5-0.5</i>             | 2.14644  | 3.98251 | 3.06448 | 1.87112  | 3.83898 | 2.85505 |
| <i>LaFeTi-1-0.625-0.375</i>         | 2.54239  | 4.28772 | 3.41505 | 2.44828  | 4.13253 | 3.2904  |
| <i>LaFeTi-1-0.75-0.25</i>           | 1.61533  | 3.95528 | 2.7853  | 1.25436  | 3.82354 | 2.53895 |
| <i>LaFeTi-1-0.875-0.125</i>         | 0.79473  | 3.11403 | 1.95438 | 0.35726  | 2.94715 | 1.65221 |
| <i>LaMn-1-1</i>                     | 3.34667  | 1.99542 | 2.67105 | 3.26449  | 1.84654 | 2.55552 |
| <i>SmFeCo-1-0.25-0.75</i>           | 0.26743  | 2.81262 | 1.54003 | 0.13661  | 2.65959 | 1.3981  |
| <i>SmFeCo-1-0.5-0.5</i>             | 0.85942  | 1.96934 | 1.41438 | 0.75592  | 1.77214 | 1.26403 |
| <i>SmFeCo-1-0.75-0.25</i>           | 0.73286  | 3.14639 | 1.93963 | 0.54143  | 2.99724 | 1.76934 |
| <i>SmFeCo-1-0.875-0.125</i>         | 0.70412  | 1.93096 | 1.31754 | 0.59884  | 1.70071 | 1.14977 |
| <i>SmFeCu-1-0.5-0.5</i>             | -0.49322 | 2.41798 | 0.96238 | -0.6376  | 2.2615  | 0.81195 |
| <i>SmFeCu-1-0.625-0.375</i>         | -1.26011 | 2.04323 | 0.39156 | -1.50523 | 1.85306 | 0.17391 |
| <i>SmFeCu-1-0.75-0.25</i>           | 0.24048  | 2.03642 | 1.13845 | 0.1332   | 1.89803 | 1.01561 |
| <i>SmFeCu-1-0.875-0.125</i>         | 0.55232  | 2.66598 | 1.60915 | 0.2156   | 2.46349 | 1.33955 |
| <i>SmFeMg-1-0.125-0.875</i>         | -2.03914 | 2.15307 | 0.05696 | -2.12155 | 1.99796 | -0.0618 |
| <i>SmFeMg-1-0.375-0.625</i>         | -0.58232 | 2.42034 | 0.91901 | -0.73914 | 2.23115 | 0.74601 |
| <i>SmFeMg-1-0.5-0.5</i>             | -1.06827 | 2.56611 | 0.74892 | -1.28096 | 2.41579 | 0.56741 |
| <i>SmFeMg-1-0.625-0.375</i>         | -0.0699  | 2.42514 | 1.17762 | -0.26691 | 2.25269 | 0.99289 |
| <i>SmFeMn-1-0.125-0.875</i>         | 2.46959  | 1.92613 | 2.19786 | 2.31854  | 1.72494 | 2.02174 |
| <i>SmFeMn-1-0.375-0.625</i>         | 0.82143  | 2.27624 | 1.54883 | 0.698    | 2.09701 | 1.39751 |
| <i>SmFeMn-1-0.5-0.5</i>             | 0.06447  | 2.81803 | 1.44125 | -0.08815 | 2.61958 | 1.26571 |
| <i>SmFeMn-1-0.625-0.375</i>         | 1.51311  | 2.69074 | 2.10192 | 1.38213  | 2.52184 | 1.95199 |
| <i>SmFeNi-1-0.125-0.875</i>         | -0.81339 | 1.97322 | 0.57991 | -0.91898 | 1.77951 | 0.43026 |
| <i>SmFeNi-1-0.25-0.75</i>           | -1.62177 | 2.51884 | 0.44853 | -1.79499 | 2.38125 | 0.29313 |
| <i>SmFeNi-1-0.375-0.625</i>         | 1.47505  | 2.14244 | 1.80875 | 1.41776  | 1.94892 | 1.68334 |
| <i>SmFeNi-1-0.5-0.5</i>             | 0.10361  | 2.44166 | 1.27263 | -0.05601 | 2.25604 | 1.10001 |
| <i>SmFeNi-1-0.75-0.25</i>           | 1.02195  | 2.56042 | 1.79119 | 0.82143  | 2.50047 | 1.66095 |
| <i>SmFeNi-1-0.875-0.125</i>         | 0.69212  | 1.95656 | 1.32434 | 0.55674  | 1.74899 | 1.15286 |
| <i>SmFeTi-1-0.125-0.875</i>         | 1.02033  | 4.74376 | 2.88204 | 0.78101  | 4.64287 | 2.71194 |
| <i>SmFeTi-1-0.375-0.625</i>         | 2.39891  | 3.83114 | 3.11502 | 2.23977  | 3.70183 | 2.9708  |
| <i>SmFeTi-1-0.5-0.5</i>             | 0.58919  | 4.6514  | 2.62029 | 0.49554  | 4.48583 | 2.49068 |
| <i>SmFeTi-1-0.625-0.375</i>         | -0.47566 | 4.88278 | 2.20356 | -0.65831 | 4.73998 | 2.04084 |
| <i>SmFeTi-1-0.75-0.25</i>           | 2.25089  | 3.26034 | 2.75561 | 2.07509  | 3.13927 | 2.60718 |
| <i>SmFeTi-1-0.875-0.125</i>         | 1.35845  | 2.90717 | 2.13281 | 1.2292   | 2.74759 | 1.98839 |
| <i>SrBaFeMn-0.5-0.5-0.625-0.375</i> | -0.71203 | 2.39628 | 0.84213 | -0.85064 | 2.28741 | 0.71838 |



|                                         |          |         |         |          |         |         |
|-----------------------------------------|----------|---------|---------|----------|---------|---------|
| <i>SrBaFeTi-0.125-0.875-0.375-0.625</i> | 1.96024  | 2.99224 | 2.47624 | 1.84566  | 2.79625 | 2.32095 |
| <i>SrBaFeTi-0.125-0.875-0.5-0.5</i>     | 2.69762  | 0.88138 | 1.7895  | 2.61318  | 0.69742 | 1.6553  |
| <i>SrBaFeTi-0.125-0.875-0.75-0.25</i>   | 0.32393  | 2.09913 | 1.21153 | 0.19266  | 1.99166 | 1.09216 |
| <i>SrBaFeTi-0.25-0.75-0.125-0.875</i>   | 3.94602  | 3.03757 | 3.49179 | 3.77102  | 2.89578 | 3.3334  |
| <i>SrBaFeTi-0.25-0.75-0.375-0.625</i>   | 3.82518  | 1.71819 | 2.77169 | 3.77786  | 1.49265 | 2.63526 |
| <i>SrBaFeTi-0.25-0.75-0.625-0.375</i>   | 1.13599  | 2.31044 | 1.72322 | 1.23526  | 2.01277 | 1.62402 |
| <i>SrBaFeTi-0.25-0.75-0.75-0.25</i>     | 0.43994  | 2.19578 | 1.31786 | 0.39086  | 2.02591 | 1.20839 |
| <i>SrBaFeTi-0.375-0.625-0.125-0.875</i> | 2.6982   | 2.81009 | 2.75415 | 2.5502   | 2.61939 | 2.58479 |
| <i>SrBaFeTi-0.375-0.625-0.25-0.75</i>   | 3.79049  | 1.84913 | 2.81981 | 3.64518  | 1.70803 | 2.67661 |
| <i>SrBaFeTi-0.375-0.625-0.375-0.625</i> | 1.27774  | 3.53121 | 2.40447 | 1.14665  | 3.41738 | 2.28201 |
| <i>SrBaFeTi-0.5-0.5-0.25-0.75</i>       | 2.68825  | 3.94301 | 3.31563 | 2.49711  | 3.84039 | 3.16875 |
| <i>SrBaFeTi-0.5-0.5-0.5-0.5</i>         | -0.10449 | 2.16596 | 1.03073 | -0.31962 | 2.05849 | 0.86943 |
| <i>SrBaFeTi-0.5-0.5-0.75-0.25</i>       | 0.15996  | 2.16491 | 1.16243 | 0.01279  | 2.03353 | 1.02316 |
| <i>SrBaFeTi-0.5-0.5-0.875-0.125</i>     | 0.99336  | 2.28036 | 1.63686 | 0.9099   | 2.13745 | 1.52367 |
| <i>SrBaFeTi-0.625-0.375-0.25-0.75</i>   | 3.21495  | 2.48203 | 2.84849 | 3.06619  | 2.35607 | 2.71113 |
| <i>SrBaFeTi-0.625-0.375-0.375-0.625</i> | 1.01402  | 3.52347 | 2.26874 | 0.89001  | 3.36684 | 2.12843 |
| <i>SrBaFeTi-0.625-0.375-0.625-0.375</i> | -0.18867 | 2.17354 | 0.99243 | -0.32671 | 2.04308 | 0.85818 |
| <i>SrBaFeTi-0.75-0.25-0.125-0.875</i>   | 5.41304  | 2.26771 | 3.84038 | 5.24031  | 2.13718 | 3.68874 |
| <i>SrBaFeTi-0.75-0.25-0.375-0.625</i>   | 1.4574   | 3.167   | 2.3122  | 1.30365  | 3.02439 | 2.16402 |
| <i>SrBaFeTi-0.75-0.25-0.625-0.375</i>   | 0.26764  | 3.03868 | 1.65316 | 0.20716  | 2.87644 | 1.5418  |
| <i>SrBaFeTi-0.75-0.25-0.75-0.25</i>     | 0.55433  | 2.21354 | 1.38393 | 0.44313  | 2.05762 | 1.25038 |
| <i>SrBaFeTi-0.875-0.125-0.375-0.625</i> | 2.92267  | 2.00046 | 2.46156 | 2.79851  | 1.82974 | 2.31413 |
| <i>SrBaFeTi-0.875-0.125-0.5-0.5</i>     | 1.47132  | 1.98774 | 1.72953 | 1.32429  | 1.86026 | 1.59227 |
| <i>SrBaFeTi-0.875-0.125-0.625-0.375</i> | 0.47209  | 1.96061 | 1.21635 | 0.41898  | 1.81749 | 1.11824 |
| <i>SrBaTi-0.125-0.875-1</i>             | 2.49681  | 5.49697 | 3.99689 | 2.30865  | 5.4256  | 3.86712 |
| <i>SrCaFeCo-0.375-0.625-0.75-0.25</i>   | -0.7625  | 2.47    | 0.85375 | -0.8968  | 2.36116 | 0.73218 |
| <i>SrCaFeCo-0.5-0.5-0.875-0.125</i>     | 0.59992  | 2.17238 | 1.38615 | 0.49399  | 2.01049 | 1.25224 |
| <i>SrCaFeCo-0.875-0.125-0.75-0.25</i>   | -0.08036 | 2.30204 | 1.11084 | -0.21927 | 2.31616 | 1.04845 |
| <i>SrCaFeMn-0.125-0.875-0.5-0.5</i>     | 0.20395  | 2.05321 | 1.12858 | 0.07216  | 1.93173 | 1.00195 |
| <i>SrCaFeMn-0.25-0.75-0.875-0.125</i>   | -0.47965 | 2.13918 | 0.82977 | -0.54861 | 1.96392 | 0.70766 |
| <i>SrCaFeTi-0.125-0.875-0.125-0.875</i> | 5.84233  | 1.98415 | 3.91324 | 5.72118  | 1.82853 | 3.77485 |
| <i>SrCaFeTi-0.125-0.875-0.375-0.625</i> | 2.46566  | 3.4225  | 2.94408 | 2.27414  | 3.27546 | 2.7748  |
| <i>SrCaFeTi-0.125-0.875-0.625-0.375</i> | 0.67647  | 2.77609 | 1.72628 | 0.53899  | 2.64274 | 1.59086 |
| <i>SrCaFeTi-0.125-0.875-0.875-0.125</i> | 2.05746  | 0.32425 | 1.19085 | 2.05465  | 0.05853 | 1.05659 |

|                                         |          |          |         |          |          |         |
|-----------------------------------------|----------|----------|---------|----------|----------|---------|
| <i>SrCaFeTi-0.25-0.75-0.375-0.625</i>   | 1.73087  | 3.73413  | 2.7325  | 1.67276  | 3.56926  | 2.62101 |
| <i>SrCaFeTi-0.25-0.75-0.5-0.5</i>       | 1.33714  | 2.21095  | 1.77405 | 1.2251   | 2.02985  | 1.62748 |
| <i>SrCaFeTi-0.25-0.75-0.625-0.375</i>   | 0.20758  | 2.53587  | 1.37172 | 0.13309  | 2.43789  | 1.28549 |
| <i>SrCaFeTi-0.25-0.75-0.75-0.25</i>     | 0.35163  | 2.66635  | 1.50899 | 0.26086  | 2.54134  | 1.4011  |
| <i>SrCaFeTi-0.375-0.625-0.25-0.75</i>   | 5.00901  | 2.76257  | 3.88579 | 4.83963  | 2.63949  | 3.73956 |
| <i>SrCaFeTi-0.375-0.625-0.5-0.5</i>     | 0.8629   | 2.47814  | 1.67052 | 0.68092  | 2.3822   | 1.53156 |
| <i>SrCaFeTi-0.5-0.5-0.375-0.625</i>     | 2.17411  | 3.56656  | 2.87033 | 2.01872  | 3.49147  | 2.7551  |
| <i>SrCaFeTi-0.5-0.5-0.5-0.5</i>         | 1.6353   | 3.06591  | 2.35061 | 1.48075  | 2.89943  | 2.19009 |
| <i>SrCaFeTi-0.625-0.375-0.375-0.625</i> | 1.98905  | 2.7555   | 2.37227 | 1.8502   | 2.58542  | 2.21781 |
| <i>SrCaFeTi-0.625-0.375-0.5-0.5</i>     | 1.55897  | 2.15344  | 1.85621 | 1.40328  | 1.99604  | 1.69966 |
| <i>SrCaFeTi-0.625-0.375-0.625-0.375</i> | 0.02437  | 2.8453   | 1.43484 | -0.07746 | 2.68084  | 1.30169 |
| <i>SrCaFeTi-0.75-0.25-0.375-0.625</i>   | 2.97458  | 1.62096  | 2.29777 | 2.88241  | 1.48599  | 2.1842  |
| <i>SrCaFeTi-0.75-0.25-0.5-0.5</i>       | 1.01756  | 2.34568  | 1.68162 | 0.93313  | 2.19214  | 1.56263 |
| <i>SrCaFeTi-0.75-0.25-0.75-0.25</i>     | 0.39886  | 2.78574  | 1.5923  | 0.32149  | 2.63988  | 1.48069 |
| <i>SrCaFeTi-0.875-0.125-0.375-0.625</i> | 1.37582  | 3.82671  | 2.60126 | 1.25977  | 3.64184  | 2.45081 |
| <i>SrCaFeTi-0.875-0.125-0.5-0.5</i>     | 0.85915  | 2.40835  | 1.63375 | 0.73296  | 2.24394  | 1.48845 |
| <i>SrCaFeTi-0.875-0.125-0.625-0.375</i> | 1.97149  | 1.26377  | 1.61763 | 1.92275  | 1.11691  | 1.51983 |
| <i>SrFeCo-1-0.75-0.25</i>               | -0.10522 | 2.0588   | 0.97679 | -0.27013 | 2.02234  | 0.87611 |
| <i>SrFeTi-1-0.125-0.875</i>             | 5.07415  | 2.48119  | 3.77767 | 4.91571  | 2.35569  | 3.6357  |
| <i>SrFeTi-1-0.25-0.75</i>               | 2.70537  | 3.12691  | 2.91614 | 2.55984  | 2.97928  | 2.76956 |
| <i>SrFeTi-1-0.375-0.625</i>             | 2.63963  | 2.94866  | 2.79415 | 2.48786  | 2.87021  | 2.67903 |
| <i>SrFeTi-1-0.75-0.25</i>               | 0.93896  | 2.0496   | 1.49428 | 0.88892  | 1.87913  | 1.38402 |
| <i>SrKFeCu-0.125-0.875-0.375-0.625</i>  | 2.46922  | -1.42122 | 0.524   | 2.57106  | -1.77234 | 0.39936 |
| <i>SrKFeTi-0.5-0.5-0.125-0.875</i>      | 0.77995  | 3.45552  | 2.11773 | 0.62951  | 3.28438  | 1.95695 |
| <i>SrKFeTi-0.625-0.375-0.125-0.875</i>  | 2.89402  | 1.8404   | 2.36721 | 2.75854  | 1.70823  | 2.23338 |
| <i>SrKFeTi-0.625-0.375-0.25-0.75</i>    | 1.23392  | 2.47078  | 1.85235 | 1.10555  | 2.33273  | 1.71914 |
| <i>SrKFeTi-0.75-0.25-0.125-0.875</i>    | 2.4769   | 4.89619  | 3.68654 | 2.37706  | 4.73508  | 3.55607 |
| <i>SrKFeTi-0.75-0.25-0.25-0.75</i>      | 1.55579  | 3.74113  | 2.64846 | 1.41319  | 3.58667  | 2.49993 |
| <i>SrKFeTi-0.75-0.25-0.375-0.625</i>    | 0.33468  | 2.62098  | 1.47783 | 0.19879  | 2.45211  | 1.32545 |
| <i>SrKFeTi-0.75-0.25-0.5-0.5</i>        | -0.0638  | 1.9385   | 0.93735 | -0.20451 | 1.80608  | 0.80078 |
| <i>SrKFeTi-0.875-0.125-0.25-0.75</i>    | 1.94338  | 3.44616  | 2.69477 | 1.82551  | 3.29875  | 2.56213 |
| <i>SrKFeTi-0.875-0.125-0.375-0.625</i>  | 2.18497  | 2.34023  | 2.2626  | 2.0563   | 2.16461  | 2.11046 |
| <i>SrKFeTi-0.875-0.125-0.75-0.25</i>    | -0.31951 | 2.05007  | 0.86528 | -0.42627 | 1.88555  | 0.72964 |
| <i>SrKTi-0.5-0.5-1</i>                  | 3.09487  | 4.56947  | 3.83217 | 2.90656  | 4.43511  | 3.67083 |
| <i>SrKTi-0.625-0.375-1</i>              | 2.79752  | 4.08245  | 3.43998 | 2.66509  | 3.9005   | 3.28279 |
| <i>SrKTi-0.75-0.25-1</i>                | 2.75175  | 4.44026  | 3.596   | 2.45856  | 4.35488  | 3.40672 |
| <i>SrLaFe-0.125-0.875-1</i>             | 3.34231  | 1.71869  | 2.5305  | 3.12841  | 1.87013  | 2.49927 |
| <i>SrLaFe-0.25-0.75-1</i>               | 1.97339  | 2.52613  | 2.24976 | 1.91929  | 2.36279  | 2.14104 |
| <i>SrLaFe-0.375-0.625-1</i>             | 1.68958  | 2.52707  | 2.10832 | 1.58331  | 2.31879  | 1.95105 |
| <i>SrLaFe-0.625-0.375-1</i>             | 2.42481  | 0.99373  | 1.70927 | 2.2734   | 0.85258  | 1.56299 |
| <i>SrLaFe-0.75-0.25-1</i>               | 2.57107  | 0.99193  | 1.7815  | 2.5084   | 0.8428   | 1.6756  |
| <i>SrLaFeCo-0.125-0.875-0.125-</i>      | 1.68021  | 2.16352  | 1.92187 | 1.52702  | 2.01933  | 1.77318 |

|                                         |          |          |         |          |          |         |
|-----------------------------------------|----------|----------|---------|----------|----------|---------|
| 0.875                                   |          |          |         |          |          |         |
| <i>SrLaFeCo-0.125-0.875-0.25-0.75</i>   | 1.727    | 2.6557   | 2.19135 | 1.59222  | 2.46986  | 2.03104 |
| <i>SrLaFeCo-0.125-0.875-0.5-0.5</i>     | 2.2876   | 2.00371  | 2.14566 | 2.1445   | 1.83701  | 1.99076 |
| <i>SrLaFeCo-0.125-0.875-0.625-0.375</i> | 2.32008  | 3.1463   | 2.73319 | 2.172    | 3.00579  | 2.5889  |
| <i>SrLaFeCo-0.125-0.875-0.75-0.25</i>   | 3.08057  | 1.77357  | 2.42707 | 2.97127  | 1.61985  | 2.29556 |
| <i>SrLaFeCo-0.125-0.875-0.875-0.125</i> | 2.34326  | 1.8354   | 2.08933 | 2.13963  | 1.64151  | 1.89057 |
| <i>SrLaFeCo-0.25-0.75-0.375-0.625</i>   | 1.0633   | 2.53494  | 1.79912 | 0.96534  | 2.48318  | 1.72426 |
| <i>SrLaFeCo-0.25-0.75-0.5-0.5</i>       | 2.0073   | -0.44946 | 0.77892 | 1.91121  | -0.62926 | 0.64097 |
| <i>SrLaFeCo-0.25-0.75-0.625-0.375</i>   | 1.67065  | 1.99939  | 1.83502 | 1.54634  | 1.78772  | 1.66703 |
| <i>SrLaFeCo-0.25-0.75-0.75-0.25</i>     | 1.50522  | 2.54489  | 2.02506 | 1.34578  | 2.55516  | 1.95047 |
| <i>SrLaFeCo-0.25-0.75-0.875-0.125</i>   | 1.99159  | 0.82537  | 1.40848 | 1.8625   | 0.67674  | 1.26962 |
| <i>SrLaFeCo-0.375-0.625-0.625-0.375</i> | 1.30776  | 2.29512  | 1.80144 | 1.15223  | 2.16628  | 1.65925 |
| <i>SrLaFeCo-0.375-0.625-0.875-0.125</i> | 1.74364  | 2.2231   | 1.98337 | 1.60072  | 2.09119  | 1.84596 |
| <i>SrLaFeCo-0.5-0.5-0.625-0.375</i>     | 0.68038  | 3.46322  | 2.0718  | 0.57076  | 3.34175  | 1.95625 |
| <i>SrLaFeCo-0.5-0.5-0.875-0.125</i>     | 2.22837  | 1.38902  | 1.80869 | 2.11616  | 1.16592  | 1.64104 |
| <i>SrLaFeCo-0.625-0.375-0.5-0.5</i>     | -0.09552 | 2.43125  | 1.16787 | -0.25113 | 2.29465  | 1.02176 |
| <i>SrLaFeCo-0.625-0.375-0.875-0.125</i> | 2.34014  | 0.56835  | 1.45425 | 2.24257  | 0.44984  | 1.34621 |
| <i>SrLaFeCo-0.75-0.25-0.625-0.375</i>   | -0.29738 | 1.98584  | 0.84423 | -0.43999 | 1.8409   | 0.70045 |
| <i>SrLaFeCu-0.125-0.875-0.75-0.25</i>   | 2.37649  | 1.41815  | 1.89732 | 2.23641  | 1.25359  | 1.745   |
| <i>SrLaFeCu-0.125-0.875-0.875-0.125</i> | 2.60449  | 0.22445  | 1.41447 | 2.48443  | 0.0654   | 1.27491 |
| <i>SrLaFeCu-0.25-0.75-0.875-0.125</i>   | 2.13047  | 2.15533  | 2.1429  | 1.93756  | 2.00529  | 1.97143 |
| <i>SrLaFeCu-0.5-0.5-0.75-0.25</i>       | -0.35177 | 2.81598  | 1.2321  | -0.51465 | 2.67763  | 1.08149 |
| <i>SrLaFeCu-0.5-0.5-0.875-0.125</i>     | 1.69126  | 2.0179   | 1.85458 | 1.5743   | 1.86746  | 1.72088 |
| <i>SrLaFeMg-0.125-0.875-0.625-0.375</i> | 1.94857  | 2.03499  | 1.99178 | 1.77512  | 1.86181  | 1.81846 |
| <i>SrLaFeMg-0.125-0.875-0.75-0.25</i>   | 1.81687  | 2.60628  | 2.21157 | 1.6416   | 2.44592  | 2.04376 |
| <i>SrLaFeMg-0.125-0.875-0.875-0.125</i> | 3.21686  | 2.04196  | 2.62941 | 3.12352  | 1.90917  | 2.51634 |
| <i>SrLaFeMg-0.25-0.75-0.625-0.375</i>   | 2.40368  | 1.83524  | 2.11946 | 2.34949  | 1.65714  | 2.00331 |
| <i>SrLaFeMg-0.25-0.75-0.75-0.25</i>     | 0.72545  | 3.51296  | 2.1192  | 0.70012  | 3.33157  | 2.01585 |
| <i>SrLaFeMg-0.25-0.75-0.875-0.125</i>   | 2.1067   | 2.05468  | 2.08069 | 2.05644  | 1.92362  | 1.99003 |
| <i>SrLaFeMg-0.375-0.625-0.75-0.25</i>   | 0.05369  | 2.01546  | 1.03457 | -0.11605 | 1.85112  | 0.86753 |
| <i>SrLaFeMg-0.375-0.625-0.875-0.125</i> | 1.14726  | 2.01909  | 1.58318 | 1.0202   | 1.79817  | 1.40919 |
| <i>SrLaFeMg-0.5-0.5-0.625-0.375</i>     | 0.506    | 2.15805  | 1.33203 | 0.39569  | 1.99243  | 1.19406 |
| <i>SrLaFeMg-0.75-0.25-0.75-0.25</i>     | -0.44193 | 2.83586  | 1.19697 | -0.58945 | 2.81699  | 1.11377 |
| <i>SrLaFeMn-0.125-0.875-0.125-0.875</i> | 2.71946  | 2.51324  | 2.61635 | 2.54071  | 2.36481  | 2.45276 |
| <i>SrLaFeMn-0.125-0.875-0.25-</i>       | 2.68237  | 2.70599  | 2.69418 | 2.50571  | 2.53732  | 2.52151 |

|                                         |          |         |         |          |          |         |
|-----------------------------------------|----------|---------|---------|----------|----------|---------|
| 0.75                                    |          |         |         |          |          |         |
| <i>SrLaFeMn-0.125-0.875-0.375-0.625</i> | 1.8283   | 3.03558 | 2.43194 | 1.64801  | 2.87042  | 2.25921 |
| <i>SrLaFeMn-0.125-0.875-0.5-0.5</i>     | 1.97254  | 3.41233 | 2.69244 | 1.80816  | 3.25134  | 2.52975 |
| <i>SrLaFeMn-0.125-0.875-0.625-0.375</i> | 2.40517  | 2.26568 | 2.33542 | 2.24194  | 2.11689  | 2.17942 |
| <i>SrLaFeMn-0.125-0.875-0.75-0.25</i>   | 1.87486  | 2.99821 | 2.43654 | 1.73464  | 2.82062  | 2.27763 |
| <i>SrLaFeMn-0.125-0.875-0.875-0.125</i> | 0.83673  | 3.88106 | 2.3589  | 0.65678  | 3.73737  | 2.19708 |
| <i>SrLaFeMn-0.25-0.75-0.125-0.875</i>   | 2.14625  | 2.2616  | 2.20392 | 2.03065  | 2.11652  | 2.07359 |
| <i>SrLaFeMn-0.25-0.75-0.25-0.75</i>     | 2.02085  | 1.85207 | 1.93646 | 1.95363  | 1.68697  | 1.8203  |
| <i>SrLaFeMn-0.25-0.75-0.375-0.625</i>   | 1.82753  | 1.95963 | 1.89358 | 1.70307  | 1.80439  | 1.75373 |
| <i>SrLaFeMn-0.25-0.75-0.5-0.5</i>       | 1.85552  | 2.74666 | 2.30109 | 1.81676  | 2.58844  | 2.2026  |
| <i>SrLaFeMn-0.25-0.75-0.625-0.375</i>   | 1.84114  | 2.01236 | 1.92675 | 1.7051   | 1.87975  | 1.79242 |
| <i>SrLaFeMn-0.25-0.75-0.75-0.25</i>     | 1.81423  | 1.99645 | 1.90534 | 1.74068  | 1.8283   | 1.78449 |
| <i>SrLaFeMn-0.25-0.75-0.875-0.125</i>   | 1.72026  | 2.45037 | 2.08532 | 1.61269  | 2.28601  | 1.94935 |
| <i>SrLaFeMn-0.375-0.625-0.375-0.625</i> | 1.97594  | 1.38526 | 1.6806  | 1.84893  | 1.20989  | 1.52941 |
| <i>SrLaFeMn-0.375-0.625-0.5-0.5</i>     | 2.18529  | 1.56956 | 1.87743 | 2.07037  | 1.32013  | 1.69525 |
| <i>SrLaFeMn-0.375-0.625-0.625-0.375</i> | 2.38727  | 1.32211 | 1.85469 | 2.30282  | 1.16468  | 1.73375 |
| <i>SrLaFeMn-0.375-0.625-0.875-0.125</i> | 1.48849  | 3.04569 | 2.26709 | 1.39857  | 2.90434  | 2.15146 |
| <i>SrLaFeMn-0.5-0.5-0.375-0.625</i>     | 3.01148  | 0.37815 | 1.69481 | 2.89146  | 0.19409  | 1.54278 |
| <i>SrLaFeMn-0.5-0.5-0.5-0.5</i>         | 2.42354  | 1.33564 | 1.87959 | 2.52679  | 0.97566  | 1.75122 |
| <i>SrLaFeMn-0.5-0.5-0.875-0.125</i>     | 1.48008  | 2.63227 | 2.05617 | 1.33718  | 2.57266  | 1.95492 |
| <i>SrLaFeMn-0.625-0.375-0.5-0.5</i>     | 0.93928  | 2.30369 | 1.62148 | 0.80759  | 2.12203  | 1.46481 |
| <i>SrLaFeMn-0.625-0.375-0.75-0.25</i>   | 0.34169  | 2.80667 | 1.57418 | 0.24307  | 2.64173  | 1.4424  |
| <i>SrLaFeMn-0.75-0.25-0.625-0.375</i>   | 0.24544  | 2.26547 | 1.25545 | 0.17484  | 2.11428  | 1.14456 |
| <i>SrLaFeMn-0.875-0.125-0.75-0.25</i>   | 0.08449  | 1.97837 | 1.03143 | -0.03884 | 1.86031  | 0.91073 |
| <i>SrLaFeNi-0.125-0.875-0.25-0.75</i>   | 0.80349  | 2.1975  | 1.5005  | 0.65301  | 2.03989  | 1.34645 |
| <i>SrLaFeNi-0.125-0.875-0.5-0.5</i>     | 1.03021  | 2.64088 | 1.83555 | 0.87911  | 2.48932  | 1.68422 |
| <i>SrLaFeNi-0.125-0.875-0.625-0.375</i> | 2.75598  | 1.26143 | 2.00871 | 2.84379  | 0.91872  | 1.88125 |
| <i>SrLaFeNi-0.125-0.875-0.875-0.125</i> | 2.89646  | 0.0921  | 1.49428 | 2.80172  | -0.08502 | 1.35835 |
| <i>SrLaFeNi-0.25-0.75-0.25-0.75</i>     | -0.36983 | 2.75327 | 1.19172 | -0.49565 | 2.59837  | 1.05136 |
| <i>SrLaFeNi-0.25-0.75-0.5-0.5</i>       | 0.10484  | 2.46048 | 1.28266 | -0.03438 | 2.40274  | 1.18418 |
| <i>SrLaFeNi-0.25-0.75-0.875-0.125</i>   | 2.20383  | 1.49317 | 1.8485  | 2.11708  | 1.26801  | 1.69255 |
| <i>SrLaFeNi-0.5-0.5-0.375-0.625</i>     | -0.23299 | 2.33845 | 1.05273 | -0.37806 | 2.19404  | 0.90799 |
| <i>SrLaFeNi-0.5-0.5-0.75-0.25</i>       | 0.80849  | 1.93265 | 1.37057 | 0.76347  | 1.69142  | 1.22744 |
| <i>SrLaFeNi-0.5-0.5-0.875-0.125</i>     | 1.06613  | 2.85229 | 1.95921 | 0.85214  | 2.7731   | 1.81262 |
| <i>SrLaFeNi-0.625-0.375-0.5-0.5</i>     | 0.38459  | 2.46575 | 1.42517 | 0.23682  | 2.29801  | 1.26742 |
| <i>SrLaFeTi-0.125-0.875-0.375-0.625</i> | 2.26893  | 4.4363  | 3.35261 | 2.10985  | 4.27777  | 3.19381 |
| <i>SrLaFeTi-0.125-0.875-0.75-</i>       | 2.40157  | 3.93286 | 3.16721 | 2.22756  | 3.79718  | 3.01237 |

|                                         |          |         |         |          |         |         |
|-----------------------------------------|----------|---------|---------|----------|---------|---------|
| 0.25                                    |          |         |         |          |         |         |
| <i>SrLaFeTi-0.125-0.875-0.875-0.125</i> | 2.30463  | 2.16573 | 2.23518 | 2.18839  | 1.94655 | 2.06747 |
| <i>SrLaFeTi-0.25-0.75-0.125-0.875</i>   | 2.74228  | 6.02286 | 4.38257 | 2.72063  | 5.88692 | 4.30378 |
| <i>SrLaFeTi-0.25-0.75-0.375-0.625</i>   | 2.88632  | 4.52354 | 3.70493 | 2.80933  | 4.38653 | 3.59793 |
| <i>SrLaFeTi-0.25-0.75-0.5-0.5</i>       | 4.04249  | 2.96247 | 3.50248 | 4.02671  | 2.79033 | 3.40852 |
| <i>SrLaFeTi-0.25-0.75-0.75-0.25</i>     | 2.83573  | 3.00608 | 2.92091 | 2.73363  | 2.82022 | 2.77693 |
| <i>SrLaFeTi-0.25-0.75-0.875-0.125</i>   | 1.52746  | 2.40096 | 1.96421 | 1.29687  | 2.23348 | 1.76518 |
| <i>SrLaFeTi-0.375-0.625-0.125-0.875</i> | 2.74717  | 4.23196 | 3.48956 | 2.58661  | 4.07177 | 3.32919 |
| <i>SrLaFeTi-0.375-0.625-0.75-0.25</i>   | 2.27576  | 3.27644 | 2.7761  | 2.13758  | 3.12089 | 2.62923 |
| <i>SrLaFeTi-0.375-0.625-0.875-0.125</i> | 2.41955  | 2.03463 | 2.22709 | 2.29078  | 1.86701 | 2.07889 |
| <i>SrLaFeTi-0.5-0.5-0.125-0.875</i>     | 6.28999  | 2.57692 | 4.43345 | 6.14102  | 2.40488 | 4.27295 |
| <i>SrLaFeTi-0.5-0.5-0.25-0.75</i>       | 5.66256  | 2.8319  | 4.24723 | 5.55711  | 2.65453 | 4.10582 |
| <i>SrLaFeTi-0.5-0.5-0.625-0.375</i>     | 1.88123  | 3.06793 | 2.47458 | 1.74527  | 2.89353 | 2.3194  |
| <i>SrLaFeTi-0.5-0.5-0.75-0.25</i>       | 2.03701  | 2.52219 | 2.2796  | 1.91287  | 2.36785 | 2.14036 |
| <i>SrLaFeTi-0.5-0.5-0.875-0.125</i>     | 2.20514  | 2.42297 | 2.31406 | 2.09054  | 2.27787 | 2.1842  |
| <i>SrLaFeTi-0.625-0.375-0.125-0.875</i> | 5.58061  | 2.92243 | 4.25152 | 5.4655   | 2.75219 | 4.10884 |
| <i>SrLaFeTi-0.625-0.375-0.25-0.75</i>   | 4.39425  | 2.84389 | 3.61907 | 4.26313  | 2.63798 | 3.45055 |
| <i>SrLaFeTi-0.625-0.375-0.625-0.375</i> | 1.82614  | 4.00267 | 2.9144  | 1.67647  | 3.8511  | 2.76379 |
| <i>SrLaFeTi-0.625-0.375-0.75-0.25</i>   | 1.93415  | 2.5284  | 2.23127 | 1.77536  | 2.37192 | 2.07364 |
| <i>SrLaFeTi-0.625-0.375-0.875-0.125</i> | 1.59553  | 2.22698 | 1.91126 | 1.4542   | 2.10931 | 1.78176 |
| <i>SrLaFeTi-0.75-0.25-0.125-0.875</i>   | 2.79966  | 4.00759 | 3.40362 | 2.66426  | 3.88298 | 3.27362 |
| <i>SrLaFeTi-0.75-0.25-0.25-0.75</i>     | 4.13383  | 2.95362 | 3.54373 | 3.97998  | 2.83266 | 3.40632 |
| <i>SrLaFeTi-0.75-0.25-0.375-0.625</i>   | 2.68024  | 3.44289 | 3.06156 | 2.53969  | 3.31682 | 2.92826 |
| <i>SrLaFeTi-0.75-0.25-0.5-0.5</i>       | 1.00218  | 4.57341 | 2.78779 | 0.8858   | 4.44014 | 2.66297 |
| <i>SrLaFeTi-0.75-0.25-0.625-0.375</i>   | 2.40501  | 1.21133 | 1.80817 | 2.24905  | 1.0776  | 1.66332 |
| <i>SrLaFeTi-0.75-0.25-0.75-0.25</i>     | 0.98245  | 3.07586 | 2.02916 | 0.87371  | 2.92487 | 1.89929 |
| <i>SrLaFeTi-0.875-0.125-0.375-0.625</i> | 1.1535   | 2.7721  | 1.9628  | 1.03375  | 2.62413 | 1.82894 |
| <i>SrLaFeTi-0.875-0.125-0.5-0.5</i>     | 1.19956  | 3.2049  | 2.20223 | 1.05662  | 3.05305 | 2.05483 |
| <i>SrLaFeTi-0.875-0.125-0.625-0.375</i> | 2.06349  | 0.78026 | 1.42187 | 1.95252  | 0.59554 | 1.27403 |
| <i>SrLaFeTi-0.875-0.125-0.75-0.25</i>   | 1.38496  | 2.01684 | 1.7009  | 1.29505  | 1.87643 | 1.58574 |
| <i>SrLaMn-0.125-0.875-1</i>             | 2.17238  | 3.46009 | 2.81623 | 1.95413  | 3.34579 | 2.64996 |
| <i>SrLaMn-0.25-0.75-1</i>               | 1.59852  | 3.32681 | 2.46267 | 1.47776  | 3.17841 | 2.32808 |
| <i>SrLaMn-0.375-0.625-1</i>             | 2.07952  | 0.90396 | 1.49174 | 1.93578  | 0.68685 | 1.31132 |
| <i>SrLaMn-0.5-0.5-1</i>                 | 1.70433  | 2.14072 | 1.92253 | 1.56411  | 1.96367 | 1.76389 |
| <i>SrSmCo-0.125-0.875-1</i>             | 1.99901  | 1.92126 | 1.96013 | 1.85493  | 1.69641 | 1.77567 |
| <i>SrSmCo-0.25-0.75-1</i>               | -1.87335 | 2.52156 | 0.32411 | -2.02721 | 2.33861 | 0.1557  |
| <i>SrSmCo-0.375-0.625-1</i>             | 0.23209  | 2.44926 | 1.34068 | 0.06442  | 2.30907 | 1.18674 |

|                                         |          |          |         |          |          |         |
|-----------------------------------------|----------|----------|---------|----------|----------|---------|
| <i>SrSmFe-0.5-0.5-1</i>                 | 2.5494   | 1.72555  | 2.13748 | 2.49234  | 1.53142  | 2.01188 |
| <i>SrSmFe-0.625-0.375-1</i>             | 2.47027  | -0.29107 | 1.0896  | 2.35383  | -0.4866  | 0.93361 |
| <i>SrSmFeCo-0.125-0.875-0.125-0.875</i> | 1.5894   | 2.08462  | 1.83701 | 1.43391  | 1.92489  | 1.6794  |
| <i>SrSmFeCo-0.125-0.875-0.25-0.75</i>   | 2.1492   | 2.82523  | 2.48721 | 2.06098  | 2.60436  | 2.33267 |
| <i>SrSmFeCo-0.125-0.875-0.375-0.625</i> | 2.06316  | 2.12314  | 2.09315 | 1.88194  | 1.93662  | 1.90928 |
| <i>SrSmFeCo-0.125-0.875-0.5-0.5</i>     | 1.10579  | 3.3725   | 2.23915 | 0.91531  | 3.22024  | 2.06778 |
| <i>SrSmFeCo-0.125-0.875-0.625-0.375</i> | 2.1994   | 3.08825  | 2.64382 | 2.04135  | 2.95403  | 2.49769 |
| <i>SrSmFeCo-0.125-0.875-0.75-0.25</i>   | 1.83844  | 3.20289  | 2.52066 | 1.62272  | 3.09754  | 2.36013 |
| <i>SrSmFeCo-0.125-0.875-0.875-0.125</i> | 1.81373  | 3.58742  | 2.70057 | 1.63314  | 3.46498  | 2.54906 |
| <i>SrSmFeCo-0.25-0.75-0.125-0.875</i>   | -0.95101 | 2.42063  | 0.73481 | -1.14529 | 2.2853   | 0.57    |
| <i>SrSmFeCo-0.25-0.75-0.375-0.625</i>   | 1.97363  | -0.17715 | 0.89824 | 1.90332  | -0.37174 | 0.76579 |
| <i>SrSmFeCo-0.25-0.75-0.5-0.5</i>       | 2.24796  | 1.50621  | 1.87708 | 2.18516  | 1.27956  | 1.73236 |
| <i>SrSmFeCo-0.25-0.75-0.625-0.375</i>   | 0.06024  | 2.84618  | 1.45321 | -0.071   | 2.67793  | 1.30346 |
| <i>SrSmFeCo-0.25-0.75-0.875-0.125</i>   | 1.39552  | 2.11472  | 1.75512 | 1.29346  | 1.95755  | 1.6255  |
| <i>SrSmFeCo-0.375-0.625-0.25-0.75</i>   | 0.20995  | 2.29842  | 1.25418 | 0.02938  | 2.16492  | 1.09715 |
| <i>SrSmFeCo-0.375-0.625-0.5-0.5</i>     | 0.76996  | 2.92702  | 1.84849 | 0.61391  | 2.79037  | 1.70214 |
| <i>SrSmFeCo-0.375-0.625-0.625-0.375</i> | 1.23148  | 3.21345  | 2.22247 | 1.11317  | 3.01733  | 2.06525 |
| <i>SrSmFeCo-0.375-0.625-0.75-0.25</i>   | 0.61717  | 2.7538   | 1.68548 | 0.45813  | 2.62054  | 1.53933 |
| <i>SrSmFeCo-0.5-0.5-0.5-0.5</i>         | 1.1163   | 2.46831  | 1.79231 | 1.04014  | 2.51259  | 1.77637 |
| <i>SrSmFeCo-0.5-0.5-0.875-0.125</i>     | 3.11608  | 1.19502  | 2.15555 | 3.09594  | 0.94376  | 2.01985 |
| <i>SrSmFeCo-0.75-0.25-0.75-0.25</i>     | -0.54419 | 2.4952   | 0.97551 | -0.74515 | 2.41749  | 0.83617 |
| <i>SrSmFeCu-0.125-0.875-0.625-0.375</i> | 0.90422  | 2.2811   | 1.59266 | 0.72679  | 2.1123   | 1.41955 |
| <i>SrSmFeCu-0.125-0.875-0.75-0.25</i>   | 1.99977  | 2.33523  | 2.1675  | 1.87774  | 2.17207  | 2.0249  |
| <i>SrSmFeCu-0.25-0.75-0.5-0.5</i>       | -0.48787 | 1.96058  | 0.73635 | -0.69467 | 1.80726  | 0.55629 |
| <i>SrSmFeCu-0.25-0.75-0.75-0.25</i>     | 0.39013  | 2.21086  | 1.3005  | 0.2185   | 2.0673   | 1.1429  |
| <i>SrSmFeCu-0.25-0.75-0.875-0.125</i>   | 2.08654  | 0.95612  | 1.52133 | 1.89235  | 0.79378  | 1.34307 |
| <i>SrSmFeCu-0.375-0.625-0.75-0.25</i>   | 0.8436   | 2.17235  | 1.50797 | 0.65536  | 2.03573  | 1.34555 |
| <i>SrSmFeCu-0.375-0.625-0.875-0.125</i> | 0.48994  | 2.21469  | 1.35232 | 0.31657  | 2.04131  | 1.17894 |
| <i>SrSmFeCu-0.5-0.5-0.75-0.25</i>       | -0.08691 | 1.96592  | 0.93951 | -0.26063 | 1.80412  | 0.77174 |
| <i>SrSmFeMg-0.125-0.875-0.5-0.5</i>     | 1.77589  | 2.36978  | 2.07283 | 1.65584  | 2.18955  | 1.92269 |
| <i>SrSmFeMg-0.125-0.875-0.75-0.25</i>   | 2.56287  | 1.55062  | 2.05675 | 2.43379  | 1.37874  | 1.90626 |
| <i>SrSmFeMg-0.125-0.875-0.875-0.125</i> | 1.70089  | 2.56367  | 2.13228 | 1.48537  | 2.47962  | 1.9825  |
| <i>SrSmFeMg-0.375-0.625-0.5-0.5</i>     | 0.60116  | 2.44294  | 1.52205 | 0.46658  | 2.30711  | 1.38684 |
| <i>SrSmFeMg-0.375-0.625-0.625-0.375</i> | 0.31154  | 2.9435   | 1.62752 | 0.22937  | 2.80103  | 1.5152  |
| <i>SrSmFeMg-0.375-0.625-0.75-0.25</i>   | 1.47461  | 2.74685  | 2.11073 | 1.40405  | 2.58195  | 1.993   |



|                                         |          |         |         |          |         |         |
|-----------------------------------------|----------|---------|---------|----------|---------|---------|
| <i>SrSmFeMg-0.5-0.5-0.75-0.25</i>       | 2.07999  | 2.50421 | 2.2921  | 2.00288  | 2.35665 | 2.17977 |
| <i>SrSmFeMg-0.5-0.5-0.875-0.125</i>     | 0.92779  | 2.43992 | 1.68385 | 0.82232  | 2.29782 | 1.56007 |
| <i>SrSmFeMg-0.625-0.375-0.75-0.25</i>   | -0.16406 | 2.53995 | 1.18795 | -0.3027  | 2.40629 | 1.0518  |
| <i>SrSmFeMn-0.125-0.875-0.125-0.875</i> | 1.92847  | 3.64562 | 2.78705 | 1.71347  | 3.50779 | 2.61063 |
| <i>SrSmFeMn-0.125-0.875-0.25-0.75</i>   | 3.73405  | 2.00136 | 2.8677  | 3.5732   | 1.82004 | 2.69662 |
| <i>SrSmFeMn-0.125-0.875-0.375-0.625</i> | 3.05904  | 2.3843  | 2.72167 | 2.89233  | 2.2174  | 2.55486 |
| <i>SrSmFeMn-0.125-0.875-0.5-0.5</i>     | 2.99284  | 3.09109 | 3.04196 | 2.80312  | 2.92098 | 2.86205 |
| <i>SrSmFeMn-0.125-0.875-0.625-0.375</i> | 2.45855  | 1.74079 | 2.09967 | 2.29736  | 1.56833 | 1.93285 |
| <i>SrSmFeMn-0.125-0.875-0.75-0.25</i>   | 2.01038  | 2.37883 | 2.1946  | 1.8479   | 2.19871 | 2.0233  |
| <i>SrSmFeMn-0.125-0.875-0.875-0.125</i> | 1.13489  | 3.1611  | 2.14799 | 0.96323  | 3.0037  | 1.98346 |
| <i>SrSmFeMn-0.25-0.75-0.125-0.875</i>   | -0.80662 | 2.10615 | 0.64976 | -0.96954 | 1.92141 | 0.47594 |
| <i>SrSmFeMn-0.25-0.75-0.375-0.625</i>   | 0.36244  | 2.11063 | 1.23653 | 0.16344  | 1.95008 | 1.05676 |
| <i>SrSmFeMn-0.25-0.75-0.5-0.5</i>       | -0.37695 | 3.03454 | 1.32879 | -0.51709 | 2.86958 | 1.17624 |
| <i>SrSmFeMn-0.25-0.75-0.625-0.375</i>   | 2.24499  | 2.0292  | 2.13709 | 2.15159  | 1.88755 | 2.01957 |
| <i>SrSmFeMn-0.375-0.625-0.125-0.875</i> | 1.70557  | 2.55272 | 2.12914 | 1.53097  | 2.38538 | 1.95817 |
| <i>SrSmFeMn-0.375-0.625-0.25-0.75</i>   | 1.72614  | 2.25221 | 1.98918 | 1.56349  | 2.07746 | 1.82047 |
| <i>SrSmFeMn-0.375-0.625-0.375-0.625</i> | 2.17309  | 1.98443 | 2.07876 | 2.03192  | 1.82082 | 1.92637 |
| <i>SrSmFeMn-0.375-0.625-0.5-0.5</i>     | 0.27314  | 2.66767 | 1.47041 | 0.09915  | 2.52962 | 1.31439 |
| <i>SrSmFeMn-0.375-0.625-0.625-0.375</i> | 3.21126  | 1.74711 | 2.47918 | 3.17186  | 1.54967 | 2.36077 |
| <i>SrSmFeMn-0.375-0.625-0.875-0.125</i> | 0.90045  | 2.86389 | 1.88217 | 0.7914   | 2.70566 | 1.74853 |
| <i>SrSmFeMn-0.5-0.5-0.375-0.625</i>     | 1.59362  | 2.02207 | 1.80784 | 1.45001  | 1.82581 | 1.63791 |
| <i>SrSmFeMn-0.5-0.5-0.875-0.125</i>     | 2.20687  | 2.42856 | 2.31772 | 2.10722  | 2.55632 | 2.33177 |
| <i>SrSmFeMn-0.625-0.375-0.625-0.375</i> | 0.09108  | 2.34989 | 1.22048 | -0.15942 | 2.30039 | 1.07048 |
| <i>SrSmFeNi-0.125-0.875-0.5-0.5</i>     | 2.32751  | 1.24464 | 1.78607 | 2.17393  | 1.0781  | 1.62602 |
| <i>SrSmFeNi-0.125-0.875-0.625-0.375</i> | 2.04062  | 1.13924 | 1.58993 | 1.91523  | 0.90796 | 1.41159 |
| <i>SrSmFeNi-0.125-0.875-0.75-0.25</i>   | 1.49446  | 3.05709 | 2.27577 | 1.35386  | 2.87934 | 2.1166  |
| <i>SrSmFeNi-0.125-0.875-0.875-0.125</i> | 2.73061  | 2.58286 | 2.65674 | 2.71244  | 2.44917 | 2.5808  |
| <i>SrSmFeNi-0.25-0.75-0.25-0.75</i>     | -1.58669 | 2.87561 | 0.64446 | -1.77305 | 2.69709 | 0.46202 |
| <i>SrSmFeNi-0.25-0.75-0.375-0.625</i>   | -1.06428 | 2.36534 | 0.65053 | -1.30086 | 2.2112  | 0.45517 |
| <i>SrSmFeNi-0.25-0.75-0.875-0.125</i>   | 1.29016  | 1.993   | 1.64158 | 1.14331  | 1.83787 | 1.49059 |
| <i>SrSmFeNi-0.375-0.625-0.375-0.625</i> | -0.93077 | 2.82458 | 0.94691 | -1.08324 | 2.6475  | 0.78213 |
| <i>SrSmFeNi-0.375-0.625-0.625-0.375</i> | -0.04228 | 2.32368 | 1.1407  | -0.17698 | 2.16831 | 0.99567 |
| <i>SrSmFeNi-0.375-0.625-0.75-0.25</i>   | 0.16237  | 2.52378 | 1.34307 | 0.04117  | 2.32897 | 1.18507 |
| <i>SrSmFeNi-0.5-0.5-0.875-0.125</i>     | 2.14116  | 1.54206 | 1.84161 | 2.04897  | 1.32686 | 1.68791 |

|                                         |          |         |         |          |         |         |
|-----------------------------------------|----------|---------|---------|----------|---------|---------|
| <i>SrSmFeNi-0.625-0.375-0.875-0.125</i> | 2.05674  | 1.32017 | 1.68846 | 1.90486  | 1.14437 | 1.52461 |
| <i>SrSmFeTi-0.125-0.875-0.875-0.125</i> | 3.09016  | 2.73068 | 2.91042 | 2.95877  | 2.56063 | 2.7597  |
| <i>SrSmFeTi-0.25-0.75-0.25-0.75</i>     | 2.49321  | 4.33991 | 3.41656 | 2.37998  | 4.19226 | 3.28612 |
| <i>SrSmFeTi-0.25-0.75-0.375-0.625</i>   | 2.00798  | 4.77538 | 3.39168 | 1.95753  | 4.62626 | 3.29189 |
| <i>SrSmFeTi-0.25-0.75-0.5-0.5</i>       | 2.81209  | 4.1543  | 3.4832  | 2.67066  | 3.97347 | 3.32207 |
| <i>SrSmFeTi-0.25-0.75-0.625-0.375</i>   | 2.09858  | 3.34682 | 2.7227  | 1.97073  | 3.19007 | 2.5804  |
| <i>SrSmFeTi-0.25-0.75-0.75-0.25</i>     | 1.11878  | 3.25787 | 2.18832 | 0.9979   | 3.1092  | 2.05355 |
| <i>SrSmFeTi-0.25-0.75-0.875-0.125</i>   | 0.31406  | 2.27301 | 1.29354 | 0.13445  | 2.09534 | 1.11489 |
| <i>SrSmFeTi-0.375-0.625-0.75-0.25</i>   | 1.689    | 3.97364 | 2.83132 | 1.50136  | 3.81079 | 2.65608 |
| <i>SrSmFeTi-0.375-0.625-0.875-0.125</i> | 1.92132  | 2.18658 | 2.05395 | 1.8036   | 1.98249 | 1.89305 |
| <i>SrSmFeTi-0.5-0.5-0.25-0.75</i>       | 4.61138  | 2.67168 | 3.64153 | 4.47738  | 2.39828 | 3.43783 |
| <i>SrSmFeTi-0.5-0.5-0.625-0.375</i>     | 3.02556  | 3.56714 | 3.29635 | 2.85522  | 3.4171  | 3.13616 |
| <i>SrSmFeTi-0.5-0.5-0.75-0.25</i>       | 2.92462  | 2.27365 | 2.59914 | 2.83402  | 2.12524 | 2.47963 |
| <i>SrSmFeTi-0.5-0.5-0.875-0.125</i>     | 2.20175  | 2.22043 | 2.21109 | 2.0546   | 2.04931 | 2.05196 |
| <i>SrSmFeTi-0.625-0.375-0.5-0.5</i>     | 2.69153  | 4.36232 | 3.52693 | 2.53184  | 4.22118 | 3.37651 |
| <i>SrSmFeTi-0.625-0.375-0.625-0.375</i> | 2.00148  | 1.57117 | 1.78632 | 1.83872  | 1.41791 | 1.62831 |
| <i>SrSmFeTi-0.625-0.375-0.75-0.25</i>   | 1.82908  | 2.4124  | 2.12074 | 1.70501  | 2.22024 | 1.96262 |
| <i>SrSmFeTi-0.625-0.375-0.875-0.125</i> | 0.75363  | 2.58496 | 1.66929 | 0.64832  | 2.39027 | 1.51929 |
| <i>SrSmFeTi-0.75-0.25-0.25-0.75</i>     | 3.87197  | 3.01045 | 3.44121 | 3.74412  | 2.80882 | 3.27647 |
| <i>SrSmFeTi-0.75-0.25-0.375-0.625</i>   | 2.60555  | 3.59722 | 3.10139 | 2.47819  | 3.45559 | 2.96689 |
| <i>SrSmFeTi-0.75-0.25-0.5-0.5</i>       | 1.90574  | 3.25883 | 2.58228 | 1.76764  | 3.14489 | 2.45626 |
| <i>SrSmFeTi-0.75-0.25-0.75-0.25</i>     | 1.44166  | 2.50825 | 1.97495 | 1.35787  | 2.34858 | 1.85322 |
| <i>SrSmFeTi-0.875-0.125-0.125-0.875</i> | 2.75786  | 4.04594 | 3.4019  | 2.6163   | 3.89113 | 3.25371 |
| <i>SrSmFeTi-0.875-0.125-0.25-0.75</i>   | 4.20854  | 2.91342 | 3.56098 | 4.04106  | 2.79161 | 3.41634 |
| <i>SrSmFeTi-0.875-0.125-0.375-0.625</i> | 1.95175  | 3.515   | 2.73338 | 1.8099   | 3.36791 | 2.5889  |
| <i>SrSmFeTi-0.875-0.125-0.5-0.5</i>     | 2.04852  | 2.73391 | 2.39122 | 1.90273  | 2.58731 | 2.24502 |
| <i>SrSmFeTi-0.875-0.125-0.625-0.375</i> | 0.13171  | 2.48992 | 1.31081 | -0.05707 | 2.38289 | 1.16291 |
| <i>SrSmFeTi-0.875-0.125-0.75-0.25</i>   | 0.78287  | 2.3519  | 1.56739 | 0.69238  | 2.19939 | 1.44589 |
| <i>SrSmFeTi-0.875-0.125-0.875-0.125</i> | 0.47279  | 2.21216 | 1.34248 | 0.31649  | 2.07606 | 1.19627 |
| <i>SrSmMn-0.125-0.875-1</i>             | 5.12196  | 0.55396 | 2.83796 | 4.93617  | 0.39448 | 2.66533 |
| <i>SrSmMn-0.375-0.625-1</i>             | 2.21697  | 1.81308 | 2.01502 | 2.05092  | 1.61969 | 1.83531 |
| <i>SrSmMn-0.5-0.5-1</i>                 | 0.82064  | 2.94473 | 1.88269 | 0.65538  | 2.76517 | 1.71027 |
| <i>SrYCo-0.125-0.875-1</i>              | 2.09236  | 2.23061 | 2.16148 | 1.95312  | 2.05051 | 2.00181 |
| <i>SrYCo-0.25-0.75-1</i>                | -0.26919 | 1.9349  | 0.83285 | -0.33314 | 1.75024 | 0.70855 |
| <i>SrYCo-0.75-0.25-1</i>                | -0.89327 | 2.03093 | 0.56883 | -0.97665 | 1.87679 | 0.45007 |
| <i>SrYFe-0.125-0.875-1</i>              | 3.84939  | 0.4018  | 2.12559 | 3.69712  | 0.2227  | 1.95991 |
| <i>SrYFe-0.375-0.625-1</i>              | 1.54395  | 2.09594 | 1.81994 | 1.39607  | 1.93581 | 1.66594 |
| <i>SrYFe-0.5-0.5-1</i>                  | 2.4141   | 1.14618 | 1.78014 | 2.24947  | 0.99959 | 1.62453 |

|                                        |          |         |         |          |         |         |
|----------------------------------------|----------|---------|---------|----------|---------|---------|
| <i>SrYFe-0.625-0.375-1</i>             | 2.0851   | 1.74782 | 1.91646 | 1.94654  | 1.58598 | 1.76626 |
| <i>SrYFeCo-0.125-0.875-0.125-0.875</i> | 1.41084  | 2.52663 | 1.96874 | 1.23341  | 2.37317 | 1.80329 |
| <i>SrYFeCo-0.125-0.875-0.25-0.75</i>   | 1.37373  | 3.38896 | 2.38135 | 1.23859  | 3.20069 | 2.21964 |
| <i>SrYFeCo-0.125-0.875-0.375-0.625</i> | 2.04984  | 1.06033 | 1.55508 | 1.87446  | 0.91817 | 1.39632 |
| <i>SrYFeCo-0.125-0.875-0.5-0.5</i>     | 2.57412  | 3.42475 | 2.99943 | 2.43504  | 3.28676 | 2.8609  |
| <i>SrYFeCo-0.125-0.875-0.625-0.375</i> | 1.48234  | 3.98965 | 2.73599 | 1.29145  | 3.82755 | 2.5595  |
| <i>SrYFeCo-0.125-0.875-0.75-0.25</i>   | 2.22232  | 0.35811 | 1.29022 | 2.05309  | 0.16197 | 1.10753 |
| <i>SrYFeCo-0.125-0.875-0.875-0.125</i> | 1.35536  | 2.80696 | 2.08116 | 1.17255  | 2.65765 | 1.9151  |
| <i>SrYFeCo-0.25-0.75-0.375-0.625</i>   | -1.46405 | 2.3971  | 0.46653 | -1.56295 | 2.24054 | 0.3388  |
| <i>SrYFeCo-0.25-0.75-0.5-0.5</i>       | -0.01031 | 2.82264 | 1.40616 | -0.07653 | 2.63219 | 1.27783 |
| <i>SrYFeCo-0.25-0.75-0.75-0.25</i>     | 0.01483  | 2.0952  | 1.05502 | -0.08799 | 1.9014  | 0.90671 |
| <i>SrYFeCo-0.25-0.75-0.875-0.125</i>   | 0.41774  | 2.37329 | 1.39551 | 0.27144  | 2.23658 | 1.25401 |
| <i>SrYFeCo-0.375-0.625-0.25-0.75</i>   | 0.53477  | 2.76338 | 1.64908 | 0.39694  | 2.59442 | 1.49568 |
| <i>SrYFeCo-0.375-0.625-0.375-0.625</i> | 1.118    | 2.48277 | 1.80038 | 0.99936  | 2.33077 | 1.66506 |
| <i>SrYFeCo-0.375-0.625-0.5-0.5</i>     | 0.78695  | 2.66869 | 1.72782 | 0.58493  | 2.51751 | 1.55122 |
| <i>SrYFeCo-0.375-0.625-0.625-0.375</i> | 1.48476  | 2.41075 | 1.94776 | 1.36345  | 2.17901 | 1.77123 |
| <i>SrYFeCo-0.375-0.625-0.75-0.25</i>   | 0.98213  | 3.18051 | 2.08132 | 0.77625  | 3.09859 | 1.93742 |
| <i>SrYFeCo-0.375-0.625-0.875-0.125</i> | 0.47771  | 3.69527 | 2.08649 | 0.24709  | 3.60633 | 1.92671 |
| <i>SrYFeCo-0.5-0.5-0.125-0.875</i>     | -0.88834 | 2.02893 | 0.57029 | -1.17847 | 1.93382 | 0.37768 |
| <i>SrYFeCo-0.5-0.5-0.5-0.5</i>         | 1.45922  | 1.98326 | 1.72124 | 1.31645  | 1.83531 | 1.57588 |
| <i>SrYFeCo-0.5-0.5-0.625-0.375</i>     | 2.94462  | 0.82455 | 1.88458 | 2.75679  | 0.64892 | 1.70285 |
| <i>SrYFeCo-0.625-0.375-0.25-0.75</i>   | -0.18067 | 2.49466 | 1.157   | -0.35306 | 2.37754 | 1.01224 |
| <i>SrYFeCo-0.625-0.375-0.5-0.5</i>     | 1.91762  | 2.34547 | 2.13154 | 1.77977  | 2.15474 | 1.96725 |
| <i>SrYFeCu-0.125-0.875-0.75-0.25</i>   | 1.55738  | 2.44441 | 2.0009  | 1.37324  | 2.3365  | 1.85487 |
| <i>SrYFeCu-0.125-0.875-0.875-0.125</i> | 2.43315  | 2.06862 | 2.25089 | 2.3197   | 1.86956 | 2.09463 |
| <i>SrYFeCu-0.375-0.625-0.75-0.25</i>   | 0.40706  | 2.22594 | 1.3165  | 0.24042  | 2.03504 | 1.13773 |
| <i>SrYFeCu-0.375-0.625-0.875-0.125</i> | 1.22689  | 2.08997 | 1.65843 | 1.06721  | 1.93142 | 1.49931 |
| <i>SrYFeCu-0.5-0.5-0.75-0.25</i>       | -0.14572 | 2.50986 | 1.18207 | -0.35524 | 2.49001 | 1.06739 |
| <i>SrYFeMg-0.125-0.875-0.625-0.375</i> | 2.51009  | 0.80978 | 1.65993 | 2.33126  | 0.63348 | 1.48237 |
| <i>SrYFeMg-0.125-0.875-0.75-0.25</i>   | 1.28031  | 2.85265 | 2.06648 | 1.11638  | 2.70307 | 1.90973 |
| <i>SrYFeMg-0.125-0.875-0.875-0.125</i> | 1.0735   | 3.41781 | 2.24566 | 0.93058  | 3.25535 | 2.09296 |
| <i>SrYFeMg-0.25-0.75-0.875-0.125</i>   | -1.15219 | 2.1104  | 0.4791  | -1.25902 | 1.95451 | 0.34775 |
| <i>SrYFeMg-0.375-0.625-0.625-0.375</i> | 0.26343  | 2.27307 | 1.26825 | 0.12814  | 2.09958 | 1.11386 |
| <i>SrYFeMg-0.375-0.625-0.75-0.25</i>   | 1.24615  | 2.27865 | 1.7624  | 1.10247  | 2.13722 | 1.61984 |

|                                        |          |         |         |          |         |         |
|----------------------------------------|----------|---------|---------|----------|---------|---------|
| <i>SrYFeMg-0.375-0.625-0.875-0.125</i> | 0.83702  | 2.70839 | 1.77271 | 0.65009  | 2.60703 | 1.62856 |
| <i>SrYFeMg-0.5-0.5-0.625-0.375</i>     | 0.84913  | 2.45805 | 1.65359 | 0.64924  | 2.38084 | 1.51504 |
| <i>SrYFeMn-0.125-0.875-0.125-0.875</i> | 2.78598  | 2.80492 | 2.79545 | 2.61456  | 2.60889 | 2.61173 |
| <i>SrYFeMn-0.125-0.875-0.25-0.75</i>   | 1.91169  | 3.18218 | 2.54694 | 1.72573  | 2.99552 | 2.36063 |
| <i>SrYFeMn-0.125-0.875-0.375-0.625</i> | 2.01993  | 3.49556 | 2.75775 | 1.86334  | 3.31091 | 2.58713 |
| <i>SrYFeMn-0.125-0.875-0.5-0.5</i>     | 1.99019  | 3.28117 | 2.63568 | 1.78442  | 3.11596 | 2.45019 |
| <i>SrYFeMn-0.125-0.875-0.625-0.375</i> | 2.00986  | 3.1994  | 2.60463 | 1.79967  | 3.07724 | 2.43845 |
| <i>SrYFeMn-0.125-0.875-0.75-0.25</i>   | 2.92896  | 0.8258  | 1.87738 | 2.77712  | 0.65586 | 1.71649 |
| <i>SrYFeMn-0.125-0.875-0.875-0.125</i> | 2.42781  | 2.46479 | 2.4463  | 2.24817  | 2.32291 | 2.28554 |
| <i>SrYFeMn-0.25-0.75-0.125-0.875</i>   | 0.77471  | 2.52463 | 1.64967 | 0.62083  | 2.34014 | 1.48049 |
| <i>SrYFeMn-0.375-0.625-0.125-0.875</i> | 1.94888  | 2.31556 | 2.13222 | 1.77338  | 2.11637 | 1.94487 |
| <i>SrYFeMn-0.375-0.625-0.25-0.75</i>   | 2.51597  | 1.86675 | 2.19136 | 2.33855  | 1.7218  | 2.03018 |
| <i>SrYFeMn-0.375-0.625-0.375-0.625</i> | 1.60514  | 2.77736 | 2.19125 | 1.39882  | 2.63851 | 2.01867 |
| <i>SrYFeMn-0.375-0.625-0.5-0.5</i>     | 1.02583  | 2.97374 | 1.99978 | 0.88977  | 2.76306 | 1.82642 |
| <i>SrYFeMn-0.375-0.625-0.625-0.375</i> | 1.03496  | 2.78452 | 1.90974 | 0.86994  | 2.61051 | 1.74022 |
| <i>SrYFeMn-0.375-0.625-0.75-0.25</i>   | 0.84379  | 2.75633 | 1.80006 | 0.64536  | 2.63834 | 1.64185 |
| <i>SrYFeMn-0.5-0.5-0.75-0.25</i>       | 1.40937  | 1.93357 | 1.67147 | 1.25576  | 1.82036 | 1.53806 |
| <i>SrYFeMn-0.625-0.375-0.125-0.875</i> | 1.14348  | 2.66516 | 1.90432 | 0.99791  | 2.45512 | 1.72651 |
| <i>SrYFeMn-0.625-0.375-0.5-0.5</i>     | 0.65242  | 1.93471 | 1.29357 | 0.49906  | 1.76975 | 1.1344  |
| <i>SrYFeMn-0.625-0.375-0.625-0.375</i> | 0.89837  | 2.29636 | 1.59736 | 0.72441  | 2.14052 | 1.43247 |
| <i>SrYFeMn-0.625-0.375-0.75-0.25</i>   | 0.09908  | 2.59641 | 1.34775 | -0.0521  | 2.42553 | 1.18672 |
| <i>SrYFeMn-0.75-0.25-0.75-0.25</i>     | -0.43036 | 2.57719 | 1.07342 | -0.55181 | 2.44749 | 0.94784 |
| <i>SrYFeMn-0.875-0.125-0.5-0.5</i>     | 0.05348  | 2.07947 | 1.06648 | -0.06952 | 1.91148 | 0.92098 |
| <i>SrYFeNi-0.125-0.875-0.125-0.875</i> | 2.17294  | 0.33026 | 1.2516  | 1.99291  | 0.1894  | 1.09115 |
| <i>SrYFeNi-0.125-0.875-0.25-0.75</i>   | 0.79061  | 4.30496 | 2.54779 | 0.6206   | 4.17474 | 2.39767 |
| <i>SrYFeNi-0.125-0.875-0.375-0.625</i> | 2.01084  | 1.07336 | 1.5421  | 1.86692  | 0.94509 | 1.40601 |
| <i>SrYFeNi-0.125-0.875-0.625-0.375</i> | 0.56448  | 3.43878 | 2.00163 | 0.43967  | 3.25587 | 1.84777 |
| <i>SrYFeNi-0.125-0.875-0.75-0.25</i>   | 1.43308  | 3.23708 | 2.33508 | 1.28699  | 3.07115 | 2.17907 |
| <i>SrYFeNi-0.125-0.875-0.875-0.125</i> | 2.77373  | 2.2551  | 2.51442 | 2.61317  | 2.12193 | 2.36755 |
| <i>SrYFeNi-0.25-0.75-0.375-0.625</i>   | -0.9215  | 2.38493 | 0.73172 | -1.03975 | 2.20331 | 0.58178 |
| <i>SrYFeNi-0.25-0.75-0.625-0.375</i>   | -0.76369 | 2.74164 | 0.98897 | -0.85991 | 2.61602 | 0.87806 |
| <i>SrYFeNi-0.375-0.625-0.75-0.25</i>   | 1.1114   | 2.61881 | 1.86511 | 0.89883  | 2.50824 | 1.70353 |
| <i>SrYFeNi-0.5-0.5-0.625-0.375</i>     | 0.16323  | 2.12378 | 1.14351 | 0.0175   | 1.95411 | 0.98581 |
| <i>SrYFeNi-0.5-0.5-0.875-0.125</i>     | 1.89063  | 2.17809 | 2.03436 | 1.71178  | 2.16807 | 1.93993 |
| <i>SrYFeTi-0.125-0.875-0.125-0.875</i> | 5.35815  | 2.29285 | 3.8255  | 5.05729  | 2.06889 | 3.56309 |
| <i>SrYFeTi-0.125-0.875-0.75-0.25</i>   | 2.84117  | 3.4644  | 3.15279 | 2.66033  | 3.30295 | 2.98164 |

|                                        |          |         |         |          |         |          |
|----------------------------------------|----------|---------|---------|----------|---------|----------|
| <i>SrYFeTi-0.125-0.875-0.875-0.125</i> | 3.67017  | 1.3639  | 2.51703 | 3.55312  | 1.17395 | 2.36353  |
| <i>SrYFeTi-0.25-0.75-0.125-0.875</i>   | 1.86357  | 5.189   | 3.52629 | 1.84191  | 5.01214 | 3.42703  |
| <i>SrYFeTi-0.25-0.75-0.25-0.75</i>     | 0.95931  | 4.35767 | 2.65849 | 0.80998  | 4.25357 | 2.53178  |
| <i>SrYFeTi-0.25-0.75-0.375-0.625</i>   | 2.03809  | 4.62506 | 3.33157 | 1.94329  | 4.44024 | 3.19177  |
| <i>SrYFeTi-0.25-0.75-0.625-0.375</i>   | 2.01799  | 4.50013 | 3.25906 | 1.93522  | 4.35473 | 3.14498  |
| <i>SrYFeTi-0.25-0.75-0.75-0.25</i>     | 0.94237  | 2.54203 | 1.7422  | 0.84703  | 2.38934 | 1.61818  |
| <i>SrYFeTi-0.25-0.75-0.875-0.125</i>   | 0.18455  | 2.88929 | 1.53692 | 0.09451  | 2.72292 | 1.40871  |
| <i>SrYFeTi-0.375-0.625-0.75-0.25</i>   | 1.88763  | 2.39096 | 2.1393  | 1.71492  | 2.22756 | 1.97124  |
| <i>SrYFeTi-0.375-0.625-0.875-0.125</i> | 2.35106  | 2.27019 | 2.31062 | 2.28436  | 2.0596  | 2.17198  |
| <i>SrYFeTi-0.5-0.5-0.625-0.375</i>     | 3.03624  | 2.32779 | 2.68201 | 2.87252  | 2.18309 | 2.52781  |
| <i>SrYFeTi-0.5-0.5-0.75-0.25</i>       | 0.99633  | 2.60023 | 1.79828 | 0.83337  | 2.4397  | 1.63654  |
| <i>SrYFeTi-0.5-0.5-0.875-0.125</i>     | 2.09191  | 1.92604 | 2.00897 | 1.93946  | 1.76269 | 1.85107  |
| <i>SrYFeTi-0.625-0.375-0.5-0.5</i>     | 3.00766  | 3.80812 | 3.40789 | 2.84057  | 3.66018 | 3.25037  |
| <i>SrYFeTi-0.625-0.375-0.625-0.375</i> | 1.60253  | 2.96362 | 2.28308 | 1.39757  | 2.83539 | 2.11648  |
| <i>SrYFeTi-0.625-0.375-0.75-0.25</i>   | 1.38653  | 2.33167 | 1.8591  | 1.26822  | 2.17352 | 1.72087  |
| <i>SrYFeTi-0.625-0.375-0.875-0.125</i> | 0.74725  | 2.39468 | 1.57096 | 0.58811  | 2.21827 | 1.40319  |
| <i>SrYFeTi-0.75-0.25-0.125-0.875</i>   | 2.71696  | 3.81898 | 3.26797 | 2.63872  | 3.64689 | 3.14281  |
| <i>SrYFeTi-0.75-0.25-0.25-0.75</i>     | 3.63759  | 2.75193 | 3.19476 | 3.53321  | 2.53278 | 3.03299  |
| <i>SrYFeTi-0.75-0.25-0.375-0.625</i>   | 2.7292   | 4.53593 | 3.63257 | 2.61987  | 4.38957 | 3.50472  |
| <i>SrYFeTi-0.75-0.25-0.5-0.5</i>       | 2.04809  | 3.23944 | 2.64377 | 1.91816  | 3.07123 | 2.49469  |
| <i>SrYFeTi-0.75-0.25-0.625-0.375</i>   | 1.89844  | 1.40765 | 1.65305 | 1.85993  | 1.23489 | 1.54741  |
| <i>SrYFeTi-0.875-0.125-0.25-0.75</i>   | 3.05111  | 3.82707 | 3.43909 | 2.86982  | 3.70632 | 3.28807  |
| <i>SrYFeTi-0.875-0.125-0.375-0.625</i> | 2.43147  | 3.50472 | 2.96809 | 2.29156  | 3.37217 | 2.83186  |
| <i>SrYFeTi-0.875-0.125-0.5-0.5</i>     | 1.81645  | 3.1522  | 2.48432 | 1.67891  | 3.01023 | 2.34457  |
| <i>SrYFeTi-0.875-0.125-0.625-0.375</i> | 0.72866  | 2.10695 | 1.41781 | 0.62359  | 1.91332 | 1.26845  |
| <i>SrYFeTi-0.875-0.125-0.75-0.25</i>   | 0.90473  | 2.04411 | 1.47442 | 0.78425  | 1.89259 | 1.33842  |
| <i>SrYMn-0.125-0.875-1</i>             | 5.71128  | 0.17576 | 2.94352 | 5.52757  | 0.02876 | 2.77817  |
| <i>SrYMn-0.25-0.75-1</i>               | -0.47173 | 2.92923 | 1.22875 | -0.65279 | 2.76973 | 1.05847  |
| <i>SrYMn-0.375-0.625-1</i>             | 2.29035  | 1.58895 | 1.93965 | 2.12119  | 1.40957 | 1.76538  |
| <i>YFe-1-1</i>                         | -1.46507 | 2.75291 | 0.64392 | -1.69426 | 2.66701 | 0.48638  |
| <i>YFeCo-1-0.125-0.875</i>             | -1.55342 | 2.71296 | 0.57977 | -1.63297 | 2.51864 | 0.44284  |
| <i>YFeCo-1-0.875-0.125</i>             | 2.69223  | 2.44786 | 2.57004 | 2.50957  | 2.26112 | 2.38534  |
| <i>YFeCu-1-0.625-0.375</i>             | -0.46419 | 2.37029 | 0.95305 | -0.64869 | 2.35024 | 0.85078  |
| <i>YFeCu-1-0.75-0.25</i>               | -1.34736 | 2.10405 | 0.37834 | -1.47806 | 1.94568 | 0.23381  |
| <i>YFeCu-1-0.875-0.125</i>             | -1.55476 | 2.01419 | 0.22971 | -1.76918 | 1.76368 | -0.00275 |
| <i>YFeMg-1-0.375-0.625</i>             | 1.59712  | 2.28237 | 1.93974 | 1.42561  | 2.15001 | 1.78781  |
| <i>YFeMg-1-0.5-0.5</i>                 | 1.13043  | 2.51042 | 1.82042 | 0.9479   | 2.34982 | 1.64886  |
| <i>YFeMg-1-0.625-0.375</i>             | -0.95553 | 2.48853 | 0.7665  | -1.06664 | 2.30385 | 0.6186   |
| <i>YFeMg-1-0.75-0.25</i>               | -0.77428 | 2.25172 | 0.73872 | -0.89885 | 2.07501 | 0.58808  |
| <i>YFeMg-1-0.875-0.125</i>             | -0.60342 | 3.04229 | 1.21944 | -0.75118 | 2.88918 | 1.069    |
| <i>YFeMn-1-0.125-0.875</i>             | -0.26266 | 2.93767 | 1.33751 | -0.40744 | 2.74074 | 1.16665  |
| <i>YFeMn-1-0.25-0.75</i>               | 0.46569  | 2.32566 | 1.39568 | 0.34036  | 2.13117 | 1.23577  |
| <i>YFeMn-1-0.375-0.625</i>             | -0.81494 | 2.85373 | 1.0194  | -0.96752 | 2.6686  | 0.85054  |
| <i>YFeMn-1-0.5-0.5</i>                 | -0.54102 | 2.54066 | 0.99982 | -0.63475 | 2.33472 | 0.84998  |
| <i>YFeNi-1-0.25-0.75</i>               | -2.11827 | 2.96178 | 0.42175 | -2.23874 | 2.84983 | 0.30554  |

|                            |          |         |         |          |         |         |
|----------------------------|----------|---------|---------|----------|---------|---------|
| <i>YFeNi-1-0.375-0.625</i> | -0.73588 | 2.12621 | 0.69516 | -0.80521 | 1.93378 | 0.56428 |
| <i>YFeNi-1-0.625-0.375</i> | -1.68672 | 2.99174 | 0.65251 | -1.84228 | 2.8125  | 0.48511 |
| <i>YFeTi-1-0.25-0.75</i>   | 0.7145   | 5.06311 | 2.88881 | 0.6242   | 4.89526 | 2.75973 |
| <i>YFeTi-1-0.375-0.625</i> | 0.79953  | 4.43847 | 2.619   | 0.6795   | 4.29884 | 2.48917 |
| <i>YFeTi-1-0.5-0.5</i>     | 0.19489  | 4.68317 | 2.43903 | 0.1249   | 4.52109 | 2.32299 |
| <i>YFeTi-1-0.625-0.375</i> | -0.81761 | 4.75315 | 1.96777 | -0.91001 | 4.56135 | 1.82567 |
| <i>YFeTi-1-0.875-0.125</i> | 0.93341  | 2.83993 | 1.88667 | 0.88188  | 2.66266 | 1.77227 |

**Table S8.** 30 promising candidates screened by the overlapping of DFT computed  $\Delta G_{0.25 \rightarrow 0.375}$ ,  $\Delta G_{0.375 \rightarrow 0.5}$ , and  $\Delta G_{0.3125 \rightarrow 0.4375}$  for CL H<sub>2</sub>O/CO<sub>2</sub> splitting at 800 and 950 °C.

| $\Delta G$ (eV)                         | T = 800 °C |            |           | T = 950 °C    |            |           |               |
|-----------------------------------------|------------|------------|-----------|---------------|------------|-----------|---------------|
|                                         | $\delta$   | 0.25-0.375 | 0.375-0.5 | 0.3125-0.4375 | 0.25-0.375 | 0.375-0.5 | 0.3125-0.4375 |
| <i>LaFeMg-1-0.875-0.125</i>             |            | 2.45832    | 2.382     | 2.42016       | 2.32419    | 2.21876   | 2.27147       |
| <i>LaFeMn-1-0.375-0.625</i>             |            | 2.38581    | 2.6456    | 2.5157        | 2.31299    | 2.45227   | 2.38263       |
| <i>LaFeMn-1-0.625-0.375</i>             |            | 2.05536    | 2.34986   | 2.20261       | 2.02352    | 2.1869    | 2.10521       |
| <i>SrKFeTi-0.875-0.125-0.375-0.625</i>  |            | 2.18497    | 2.34023   | 2.2626        | 2.0563     | 2.16461   | 2.11046       |
| <i>SrLaFe-0.25-0.75-1</i>               |            | 1.97339    | 2.52613   | 2.24976       | 1.91929    | 2.36279   | 2.14104       |
| <i>SrLaFeCo-0.125-0.875-0.5-0.5</i>     |            | 2.2876     | 2.00371   | 2.14566       | 2.1445     | 1.83701   | 1.99076       |
| <i>SrLaFeCu-0.25-0.75-0.875-0.125</i>   |            | 2.13047    | 2.15533   | 2.1429        | 1.93756    | 2.00529   | 1.97143       |
| <i>SrLaFeMg-0.25-0.75-0.875-0.125</i>   |            | 2.1067     | 2.05468   | 2.08069       | 2.05644    | 1.92362   | 1.99003       |
| <i>SrLaFeMn-0.125-0.875-0.125-0.875</i> |            | 2.71946    | 2.51324   | 2.61635       | 2.54071    | 2.36481   | 2.45276       |
| <i>SrLaFeMn-0.125-0.875-0.25-0.75</i>   |            | 2.68237    | 2.70599   | 2.69418       | 2.50571    | 2.53732   | 2.52151       |
| <i>SrLaFeMn-0.125-0.875-0.625-0.375</i> |            | 2.40517    | 2.26568   | 2.33542       | 2.24194    | 2.11689   | 2.17942       |
| <i>SrLaFeMn-0.25-0.75-0.125-0.875</i>   |            | 2.14625    | 2.2616    | 2.20392       | 2.03065    | 2.11652   | 2.07359       |
| <i>SrLaFeTi-0.125-0.875-0.875-0.125</i> |            | 2.30463    | 2.16573   | 2.23518       | 2.18839    | 1.94655   | 2.06747       |
| <i>SrLaFeTi-0.375-0.625-0.875-0.125</i> |            | 2.41955    | 2.03463   | 2.22709       | 2.29078    | 1.86701   | 2.07889       |
| <i>SrLaFeTi-0.5-0.5-0.75-0.25</i>       |            | 2.03701    | 2.52219   | 2.2796        | 1.91287    | 2.36785   | 2.14036       |
| <i>SrLaFeTi-0.5-0.5-0.875-0.125</i>     |            | 2.20514    | 2.42297   | 2.31406       | 2.09054    | 2.27787   | 2.1842        |
| <i>SrSmFeCo-0.125-0.875-0.375-0.625</i> |            | 2.06316    | 2.12314   | 2.09315       | 1.88194    | 1.93662   | 1.90928       |
| <i>SrSmFeCu-0.125-0.875-0.75-0.25</i>   |            | 1.99977    | 2.33523   | 2.1675        | 1.87774    | 2.17207   | 2.0249        |
| <i>SrSmFeMg-0.5-0.5-0.75-0.25</i>       |            | 2.07999    | 2.50421   | 2.2921        | 2.00288    | 2.35665   | 2.17977       |
| <i>SrSmFeMn-0.125-0.875-0.75-0.25</i>   |            | 2.01038    | 2.37883   | 2.1946        | 1.8479     | 2.19871   | 2.0233        |
| <i>SrSmFeMn-0.25-0.75-0.625-0.375</i>   |            | 2.24499    | 2.0292    | 2.13709       | 2.15159    | 1.88755   | 2.01957       |
| <i>SrSmFeMn-0.5-0.5-0.875-0.125</i>     |            | 2.20687    | 2.42856   | 2.31772       | 2.10722    | 2.55632   | 2.33177       |
| <i>SrSmFeNi-0.125-0.875-0.875-0.125</i> |            | 2.73061    | 2.58286   | 2.65674       | 2.71244    | 2.44917   | 2.5808        |
| <i>SrSmFeTi-0.5-0.5-0.875-0.125</i>     |            | 2.20175    | 2.22043   | 2.21109       | 2.0546     | 2.04931   | 2.05196       |
| <i>SrSmFeTi-0.875-0.125-0.5-0.5</i>     |            | 2.04852    | 2.73391   | 2.39122       | 1.90273    | 2.58731   | 2.24502       |
| <i>SrYCo-0.125-0.875-1</i>              |            | 2.09236    | 2.23061   | 2.16148       | 1.95312    | 2.05051   | 2.00181       |
| <i>SrYFeCu-0.125-0.875-0.875-0.125</i>  |            | 2.43315    | 2.06862   | 2.25089       | 2.3197     | 1.86956   | 2.09463       |
| <i>SrYFeMn-0.125-0.875-0.875-0.125</i>  |            | 2.42781    | 2.46479   | 2.4463        | 2.24817    | 2.32291   | 2.28554       |
| <i>SrYFeTi-0.375-0.625-0.875-0.125</i>  |            | 2.35106    | 2.27019   | 2.31062       | 2.28436    | 2.0596    | 2.17198       |
| <i>YFeCo-1-0.875-0.125</i>              |            | 2.69223    | 2.44786   | 2.57004       | 2.50957    | 2.26112   | 2.38534       |



**Table S9.** 55 promising candidates screened by DFT computed  $\Delta G_{0 \rightarrow 0.125}$ ,  $\Delta G_{0.125 \rightarrow 0.25}$ , or  $\Delta G_{0.0625 \rightarrow 0.1875}$  for CL H<sub>2</sub>O/CO<sub>2</sub> splitting at 800 or 950 °C. The  $\Delta G_{0.25 \rightarrow 0.375}$  of these samples are all greater than 3 eV, making it impractical to reach very high  $\delta$ .

| $\Delta G$ (eV)                         | T = 800 °C |         |            | T = 950 °C    |         |            |               |
|-----------------------------------------|------------|---------|------------|---------------|---------|------------|---------------|
|                                         | $\delta$   | 0-0.125 | 0.125-0.25 | 0.0625-0.1875 | 0-0.125 | 0.125-0.25 | 0.0625-0.1875 |
| <i>LaFeTi-1-0.25-0.75</i>               |            | 2.61833 | 0.37584    | 1.49708       | 2.21279 | -0.02466   | 1.09406       |
| <i>SrBaFeTi-0.125-0.875-0.25-0.75</i>   |            | 2.73005 | -0.9878    | 0.87112       | 2.56834 | -1.14021   | 0.71406       |
| <i>SrBaFeTi-0.25-0.75-0.125-0.875</i>   |            | 1.53297 | 3.16408    | 2.34853       | 1.43513 | 3.0434     | 2.23927       |
| <i>SrBaFeTi-0.5-0.5-0.125-0.875</i>     |            | 2.52477 | 0.56256    | 1.54367       | 2.39961 | 0.39974    | 1.39967       |
| <i>SrBaFeTi-0.625-0.375-0.25-0.75</i>   |            | 1.02045 | 2.69068    | 1.85557       | 0.99084 | 2.57603    | 1.78343       |
| <i>SrBaTi-0.375-0.625-1</i>             |            | 1.10089 | 4.01777    | 2.55933       | 0.72784 | 3.91838    | 2.32311       |
| <i>SrBaTi-0.5-0.5-1</i>                 |            | 1.01364 | 4.31933    | 2.66649       | 0.61839 | 4.22356    | 2.42098       |
| <i>SrBaTi-0.625-0.375-1</i>             |            | 1.21633 | 3.51969    | 2.36801       | 0.84566 | 3.34673    | 2.0962        |
| <i>SrBaTi-0.75-0.25-1</i>               |            | 1.10322 | 3.48444    | 2.29383       | 0.62956 | 3.29501    | 1.96229       |
| <i>SrBaTi-0.875-0.125-1</i>             |            | 0.76827 | 3.61074    | 2.18951       | 0.30147 | 3.45844    | 1.87996       |
| <i>SrCaFeTi-0.375-0.625-0.125-0.875</i> |            | 2.98525 | 1.86667    | 2.42596       | 2.86675 | 1.72369    | 2.29522       |
| <i>SrCaFeTi-0.625-0.375-0.125-0.875</i> |            | 2.75525 | 1.72026    | 2.23776       | 2.64512 | 1.56995    | 2.10753       |
| <i>SrCaFeTi-0.625-0.375-0.25-0.75</i>   |            | 0.85242 | 2.21989    | 1.53615       | 0.76839 | 2.09476    | 1.43158       |
| <i>SrCaTi-0.625-0.375-1</i>             |            | 0.18582 | 4.73157    | 2.45869       | 0.29962 | 4.69243    | 2.19641       |
| <i>SrKFeTi-0.875-0.125-0.125-0.875</i>  |            | 2.12724 | 0.47268    | 1.29996       | 2.07292 | 0.33653    | 1.20472       |
| <i>SrLaFeTi-0.125-0.875-0.125-0.875</i> |            | 0.44277 | 4.07956    | 2.26117       | 0.18162 | 4.01982    | 2.10072       |
| <i>SrLaFeTi-0.25-0.75-0.5-0.5</i>       |            | 0.82971 | 3.59693    | 2.21332       | 0.61209 | 3.35133    | 1.98171       |
| <i>SrLaFeTi-0.25-0.75-0.625-0.375</i>   |            | 2.07148 | 3.18229    | 2.62689       | 2.03791 | 2.96087    | 2.49939       |
| <i>SrLaFeTi-0.375-0.625-0.5-0.5</i>     |            | 1.78934 | 3.25536    | 2.52235       | 1.76537 | 3.13098    | 2.44817       |
| <i>SrLaFeTi-0.375-0.625-0.625-0.375</i> |            | 2.4382  | 2.45988    | 2.44904       | 2.32327 | 2.33526    | 2.32927       |
| <i>SrLaFeTi-0.5-0.5-0.125-0.875</i>     |            | 1.09986 | 3.69375    | 2.3968        | 0.59966 | 3.57172    | 2.08569       |
| <i>SrLaFeTi-0.5-0.5-0.375-0.625</i>     |            | 2.64907 | 3.91694    | 3.283         | 2.61296 | 3.75229    | 3.18262       |
| <i>SrLaFeTi-0.625-0.375-0.375-0.625</i> |            | 2.2582  | 3.43892    | 2.84856       | 2.18278 | 3.29976    | 2.74127       |
| <i>SrLaFeTi-0.625-0.375-0.5-0.5</i>     |            | 2.00979 | 1.95869    | 1.98424       | 1.88632 | 1.86521    | 1.87577       |
| <i>SrLaFeTi-0.875-0.125-0.25-0.75</i>   |            | 1.76828 | 2.96064    | 2.36446       | 1.65406 | 2.88835    | 2.27121       |
| <i>SrLaTi-0.25-0.75-1</i>               |            | 2.26366 | 5.18142    | 3.72254       | 2.09363 | 5.15595    | 3.62479       |
| <i>SrLaTi-0.375-0.625-1</i>             |            | 0.35367 | 4.74228    | 2.54797       | 0.02842 | 4.65147    | 2.31153       |
| <i>SrLaTi-0.5-0.5-1</i>                 |            | 1.04013 | 3.80752    | 2.42383       | 0.56101 | 3.61374    | 2.08737       |
| <i>SrLaTi-0.875-0.125-1</i>             |            | 0.74824 | 4.20988    | 2.47906       | 0.18411 | 4.13168    | 2.1579        |
| <i>SrSmFeMn-0.125-0.875-0.25-0.75</i>   |            | 0.90949 | 2.67563    | 1.79256       | 0.7773  | 2.53358    | 1.65544       |
| <i>SrSmFeTi-0.125-0.875-0.25-0.75</i>   |            | 0.64527 | 4.55575    | 2.60051       | 0.47218 | 4.4146     | 2.44339       |
| <i>SrSmFeTi-0.125-0.875-0.375-0.625</i> |            | 2.5702  | 5.77071    | 4.17046       | 2.48114 | 5.60411    | 4.04262       |
| <i>SrSmFeTi-0.125-0.875-0.625-0.375</i> |            | 2.13477 | 3.19685    | 2.66581       | 1.99074 | 3.10755    | 2.54914       |
| <i>SrSmFeTi-0.375-0.625-0.375-0.625</i> |            | 2.62259 | 4.32369    | 3.47314       | 2.52522 | 4.19108    | 3.35815       |
| <i>SrSmFeTi-0.375-0.625-0.5-0.5</i>     |            | 1.61553 | 2.58371    | 2.09962       | 1.48445 | 2.44366    | 1.96405       |

|                                         |         |         |          |          |         |         |
|-----------------------------------------|---------|---------|----------|----------|---------|---------|
| <i>SrSmFeTi-0.5-0.5-0.125-0.875</i>     | 0.23435 | 4.60965 | 2.422    | 0.06879  | 4.51021 | 2.2895  |
| <i>SrSmFeTi-0.625-0.375-0.375-0.625</i> | 2.30435 | 3.12287 | 2.71361  | 2.17399  | 2.99457 | 2.58428 |
| <i>SrSmFeTi-0.875-0.125-0.25-0.75</i>   | 1.91979 | 2.6695  | 2.29464  | 1.86213  | 2.53912 | 2.20062 |
| <i>SrSmTi-0.375-0.625-1</i>             | 0.73188 | 4.74136 | 2.73662  | 0.50183  | 4.70165 | 2.60174 |
| <i>SrSmTi-0.75-0.25-1</i>               | 0.2649  | 4.47324 | 2.36907  | -0.3035  | 4.39566 | 2.04608 |
| <i>SrTi-1-1</i>                         | 0.03399 | 4.19383 | 2.11391  | -0.68592 | 4.16466 | 1.73937 |
| <i>SrYFeTi-0.125-0.875-0.25-0.75</i>    | 0.06104 | 4.84417 | 2.39156  | 0.15373  | 4.71249 | 2.27938 |
| <i>SrYFeTi-0.125-0.875-0.625-0.375</i>  | 1.16916 | 3.4309  | 2.30003  | 1.06842  | 3.28864 | 2.17853 |
| <i>SrYFeTi-0.125-0.875-0.875-0.125</i>  | 6.57365 | 2.58122 | -1.99622 | 6.85329  | 2.42008 | -2.2166 |
| <i>SrYFeTi-0.375-0.625-0.5-0.5</i>      | 1.12713 | 3.23622 | 2.18168  | 1.03727  | 3.10036 | 2.06882 |
| <i>SrYFeTi-0.375-0.625-0.625-0.375</i>  | 2.53148 | 2.24377 | 2.38763  | 2.42814  | 2.13511 | 2.28163 |
| <i>SrYFeTi-0.5-0.5-0.125-0.875</i>      | 0.02339 | 4.24864 | 2.11262  | 0.14214  | 4.11895 | 1.9884  |
| <i>SrYFeTi-0.5-0.5-0.25-0.75</i>        | 2.4195  | 3.92455 | 3.17202  | 2.24297  | 3.79338 | 3.01818 |
| <i>SrYFeTi-0.5-0.5-0.375-0.625</i>      | 2.4856  | 2.82335 | 2.65448  | 2.37062  | 2.69478 | 2.5327  |
| <i>SrYFeTi-0.5-0.5-0.5-0.5</i>          | 1.50006 | 2.04429 | 0.27212  | 1.67772  | 1.92026 | 0.12127 |
| <i>SrYFeTi-0.625-0.375-0.375-0.625</i>  | 2.25748 | 3.28948 | 2.77348  | 2.13157  | 3.14408 | 2.63782 |
| <i>SrYFeTi-0.75-0.25-0.25-0.75</i>      | 2.71785 | 4.15441 | 3.43613  | 2.61738  | 3.99223 | 3.3048  |
| <i>SrYFeTi-0.875-0.125-0.125-0.875</i>  | 2.22825 | 3.67554 | 2.95189  | 2.10701  | 3.53614 | 2.82157 |
| <i>SrYTi-0.625-0.375-1</i>              | 1.99003 | 4.0987  | 3.04437  | 1.83109  | 3.94363 | 2.88736 |
| <i>SrYTi-0.75-0.25-1</i>                | 0.26527 | 4.22596 | 1.98035  | 0.82876  | 4.08095 | 1.62609 |

## References

1. Frisch, M., Trucks, G., Schlegel, H.B., Scuseria, G.E., Robb, M.A., Cheeseman, J.R., Scalmani, G., Barone, V., Mennucci, B., and Petersson, G. (2009). gaussian 09, Revision d. 01, Gaussian. Inc., Wallingford CT 201.
2. <https://janaf.nist.gov/>
3. Montgomery Jr, J.A., Frisch, M.J., Ochterski, J.W., and Petersson, G.A. A complete basis set model chemistry. VI. Use of density functional geometries and frequencies. *J. Chem. Phys.* **110**, 2822-2827 (1999).
4. Radin, M.D., Rodriguez, J.F., Tian, F., and Siegel, D.J. Lithium peroxide surfaces are metallic, while lithium oxide surfaces are not. *J. Am. Chem. Soc.* **134**, 1093-1103 (2012).
5. Shannon, R.D. Revised effective ionic radii and systematic studies of interatomic distances in halides and chalcogenides. *Acta Crystallogr A* **32**, 751-767 (1976).
6. Chatzichristodoulou, C., Norby, P., Hendriksen, P.V., and Mogensen, M.B. Size of oxide vacancies in fluorite and perovskite structured oxides. *J. Electroceram.* **34**, 100-107 (2015).
7. Dou, J., Krzystowczyk, E., Wang, X., Robbins, T., Ma, L., Liu, X., and Li, F. A-and B-site Codoped SrFeO<sub>3</sub> Oxygen Sorbents for Enhanced Chemical Looping Air Separation. *ChemSusChem* **13**, 385-393 (2020).

8. Lankhorst, M.H., Bouwmeester, H., and Verweij, H. High-temperature coulometric titration of  $\text{La}_{1-x}\text{Sr}_x\text{CoO}_{3-\delta}$ : evidence for the effect of electronic band structure on nonstoichiometry behavior. *J. Solid State Chem.* **133**, 555-567 (1997).
9. Yasumoto, K., Inagaki, Y., Shiono, M., and Dokiya, M. An (La, Sr)(Co, Cu)  $\text{O}_{3-\delta}$  cathode for reduced temperature SOFCs. *Solid State Ionics* **148**, 545-549 (2002).
10. Kuhn, M., Hashimoto, S., Sato, K., Yashiro, K., and Mizusaki, J. Oxygen nonstoichiometry, thermo-chemical stability and lattice expansion of  $\text{La}_{0.6}\text{Sr}_{0.4}\text{FeO}_{3-\delta}$ . *Solid State Ion.* **195**, 7-15 (2011).
